# Supplementary material for: Measuring precarious employment in Sweden: translation, adaptation and psychometric properties of the Employment Precariousness Scale (EPRES)
Source: PubMed Central journal article supplement — BMJ Open. 2019 Sep 24;9(9):e029577. doi: 10.1136/bmjopen-2019-029577 (PMC6773301; doi:10.1136/bmjopen-2019-029577), 2019-09-24
Supplement: bmjopen-2019-029577.draft_revisions.pdf [file bmjopen-2019-029577.draft_revisions.pdf]

# BMJ Open

BMJ Open is committed to open peer review. As part of this commitment we make the peer review history of every article we publish publicly available.

When an article is published we post the peer reviewers' comments and the authors' responses online. We also post the versions of the paper that were used during peer review. These are the versions that the peer review comments apply to.

The versions of the paper that follow are the versions that were submitted during the peer review process. They are not the versions of record or the final published versions. They should not be cited or distributed as the published version of this manuscript.

BMJ Open is an open access journal and the full, final, typeset and author-corrected version of record of the manuscript is available on our site with no access controls, subscription charges or pay-per-view fees (<http://bmjopen.bmj.com>).

If you have any questions on BMJ Open's open peer review process please email [info.bmjopen@bmj.com](mailto:info.bmjopen@bmj.com)

# BMJ Open

## Measuring precarious employment in Sweden: Translation, adaptation and psychometric properties of the Employment Precariousness Scale (EPRES)

|                               |                                                                                                                                                                                                                                                                                                                                                                                                                                                                                                                                                                                                                                                                                                                                                                                                                                                                                                                                                                                                                                                                                                                                                                                                                                                                                                                                                                                                                                |
|-------------------------------|--------------------------------------------------------------------------------------------------------------------------------------------------------------------------------------------------------------------------------------------------------------------------------------------------------------------------------------------------------------------------------------------------------------------------------------------------------------------------------------------------------------------------------------------------------------------------------------------------------------------------------------------------------------------------------------------------------------------------------------------------------------------------------------------------------------------------------------------------------------------------------------------------------------------------------------------------------------------------------------------------------------------------------------------------------------------------------------------------------------------------------------------------------------------------------------------------------------------------------------------------------------------------------------------------------------------------------------------------------------------------------------------------------------------------------|
| Journal:                      | <i>BMJ Open</i>                                                                                                                                                                                                                                                                                                                                                                                                                                                                                                                                                                                                                                                                                                                                                                                                                                                                                                                                                                                                                                                                                                                                                                                                                                                                                                                                                                                                                |
| Manuscript ID                 | bmjopen-2019-029577                                                                                                                                                                                                                                                                                                                                                                                                                                                                                                                                                                                                                                                                                                                                                                                                                                                                                                                                                                                                                                                                                                                                                                                                                                                                                                                                                                                                            |
| Article Type:                 | Research                                                                                                                                                                                                                                                                                                                                                                                                                                                                                                                                                                                                                                                                                                                                                                                                                                                                                                                                                                                                                                                                                                                                                                                                                                                                                                                                                                                                                       |
| Date Submitted by the Author: | 31-Jan-2019                                                                                                                                                                                                                                                                                                                                                                                                                                                                                                                                                                                                                                                                                                                                                                                                                                                                                                                                                                                                                                                                                                                                                                                                                                                                                                                                                                                                                    |
| Complete List of Authors:     | <p>Jonsson, Johanna; Karolinska Institutet, Institute of Environmental Medicine, Unit of Occupational Medicine</p> <p>Vives, Alejandra; Pontificia Universidad Catolica de Chile Escuela de Medicina, Department of Public Health; Universitat Pompeu Fabra, Department of Political and Social Sciences, Health Inequalities Research Group, Employment Conditions Knowledge Network (GREDS-EMCONET)</p> <p>Benach, Joan; Universitat Pompeu Fabra, Department of Political and Social Sciences, Health Inequalities Research Group, Employment Conditions Knowledge Network (GREDS-EMCONET); Universidad Autonoma de Madrid, Transdisciplinary Research Group on Socioecological Transitions (GinTRANS2)</p> <p>Kjellberg, Katarina; Karolinska Institutet, Institute of Environmental Medicine, Unit of Occupational Medicine; Stockholm County Council, Center for Occupational and Environmental Medicine</p> <p>Johansson, Gun; Karolinska Institute, Institute of Environmental Medicine, Unit of Occupational Medicine; Stockholm County Council, Center for Occupational and Environmental Medicine</p> <p>Selander, Jenny; Karolinska Institutet, Institute of Environmental Medicine, Unit of Occupational Medicine</p> <p>Bodin, Theo; Karolinska Institutet, Unit of Occupational Medicine, Institute of Environmental Medicine; Stockholm County Council, Center for Occupational and Environmental Medicine</p> |
| Keywords:                     | EPIDEMIOLOGY, OCCUPATIONAL & INDUSTRIAL MEDICINE, PUBLIC HEALTH, STATISTICS & RESEARCH METHODS                                                                                                                                                                                                                                                                                                                                                                                                                                                                                                                                                                                                                                                                                                                                                                                                                                                                                                                                                                                                                                                                                                                                                                                                                                                                                                                                 |
|                               |                                                                                                                                                                                                                                                                                                                                                                                                                                                                                                                                                                                                                                                                                                                                                                                                                                                                                                                                                                                                                                                                                                                                                                                                                                                                                                                                                                                                                                |

SCHOLARONE™  
Manuscripts

1  
2  
3 **Measuring precarious employment in Sweden: Translation,**  
4 **adaptation and psychometric properties of the Employment**  
5 **Precariousness Scale (EPRES)**  
6  
7  
8  
9

10  
11  
12 Johanna Jonsson\* (MSc)<sup>1</sup>, Alejandra Vives (MD, PhD)<sup>2,3</sup>, Joan Benach (MD, PhD)<sup>3,4</sup>,  
13 Katarina Kjellberg (PhD)<sup>1,5</sup>, Jenny Selander (PhD)<sup>1</sup>, Gun Johansson (PhD)<sup>1,5</sup> & Theo  
14 Bodin (MD, PhD)<sup>1,5</sup>  
15  
16  
17  
18  
19

20 1 Institute of Environmental Medicine, Unit of Occupational Medicine, Karolinska Institutet, Stockholm,  
21 Sweden  
22

23 2 Department of Public Health, School of Medicine, Pontificia Universidad Católica de Chile  
24

25 3 Health Inequalities Research Group, Employment Conditions Knowledge Network (GREDS-  
26 EMCONET), Department of Political and Social Sciences, Universitat Pompeu Fabra, Barcelona, Spain  
27

28 4 Transdisciplinary Research Group on Socioecological Transitions (GinTRANS2). Universidad  
29 Autónoma Madrid, 28049 Madrid, Spain  
30

31 5 Centre for Occupational and Environmental Medicine, Stockholm County Council, Stockholm,  
32 Sweden  
33  
34  
35

36 \* Corresponding author:  
37

38 Johanna Jonsson  
39

40 Karolinska Institutet  
41

42 Institute of Environmental Medicine, Unit of Occupational Medicine  
43

44 Solnavägen 4, 11365  
45

46 Stockholm, SWEDEN  
47

48 [Johanna.Jonsson@ki.se](mailto:Johanna.Jonsson@ki.se)  
49

50 Telephone: +46 737 665367  
51  
52  
53  
54  
55  
56  
57  
58  
59  
60

## ABSTRACT

**Objectives:** Precarious employment is a determinant of poor health and health inequality. However, the evidence of health consequences and mechanisms underlying the associations, are still limited due to a lack of a precise definition and measurement instrument. The Employment Precariousness Scale (EPRES) is a Spanish, multidimensional scale, developed to measure degree of precarious employment. This study aims to translate the EPRES-2010 into Swedish, adapt it to the Swedish context, and to assess the psychometric properties of the Swedish EPRES.

**Method:** EPRES was translated, adapted and implemented for data collection within the research project PREMIS. During 2016-2017, questionnaire data was collected from 483 non-standard employees in Stockholm, Sweden, sampled with web-based respondent-driven sampling. Analyses included item descriptive statistics, scale descriptive statistics and exploratory factor analysis.

**Results:** The final EPRES-Se consisted of six dimensions and 23 items. There was a high response rate to all items and response options. Global Cronbach's alpha was 0.83. Subscales 'vulnerability', 'rights' and 'exercise rights' had reliability coefficients between  $\alpha = 0.78-0.89$  and item-subscale correlations between  $r = 0.48-0.79$ . 'Temporariness' had poor reliability ( $\alpha = -0.08$ ) and inter-item correlation ( $r = -0.04$ ), while 'disempowerment' showed acceptable psychometric properties ( $\alpha = 0.5$ ;  $r = 0.34$ ). Exploratory factor analysis confirmed the original EPRES factor structure.

**Conclusions:** 'Vulnerability', 'wages' 'rights', 'exercise rights' and 'disempowerment' worked in the Swedish context; however 'temporariness' would need revising before

1  
2  
3 implementing the EPRES-Se in further research. Continued work and validation of  
4  
5  
6 EPRES-Se is encouraged. In order to enable international comparisons and  
7  
8  
9 multinational studies, similar studies in other European countries are also called for.  
10  
11  
12  
13

#### 14 **Strengths and limitations of this study:**

- 16 • First translation and adaptation of the EPRES-2010 to Swedish and the Swedish  
17 context  
18
- 20 • First assessment of the psychometric properties of the EPRES-Se  
21
- 22 • Relatively small sample restricted to non-standard employees  
23
- 24 • Limited generalizability of results  
25  
26  
27  
28  
29  
30  
31  
32  
33  
34  
35  
36  
37  
38  
39  
40  
41  
42  
43  
44  
45  
46  
47  
48  
49  
50  
51  
52  
53  
54  
55  
56  
57  
58  
59  
60

## INTRODUCTION

1  
2  
3  
4  
5  
6 Precarious employment (PE) is considered a social determinant of poor health and  
7  
8 health inequality (1-3). PE is widespread in middle - and poor income countries but is  
9  
10 becoming more common also in wealthy countries (4). However, evidence of the health  
11  
12 consequences of precarious employment, and by which mechanisms PE harm workers'  
13  
14 health, is still limited due to the lack of a precise definition and measurement  
15  
16 instrument (5). This lack also brings about challenges in terms of capturing the size of  
17  
18 the population in precarious employment, as well as conducting occupational health  
19  
20 and safety surveillance (5, 6). The Employment Precariousness Scale (EPRES) is a  
21  
22 Spanish questionnaire developed to measure six dimensions of precarious  
23  
24 employment. EPRES has previously been validated in Spanish and Chilean populations  
25  
26 (7-10), and also applied to the population of Catalonia (11), but as of yet there is no  
27  
28 Swedish translation or adaptation.  
29  
30  
31  
32  
33  
34  
35  
36  
37  
38

### Precarious Employment

39  
40  
41 Financial crises, deterioration of labor market conditions, increased trade competition,  
42  
43 technological innovations and globalization has had a considerable impact on the  
44  
45 dynamics of the labor market (12, 13). These impacts have resulted in a decline in  
46  
47 attachment to employers, risk shifting from employer to employees, growth in  
48  
49 perceived and actual job insecurity and work-based stress, and increasing  
50  
51 unemployment and non-standard work (12). There has been a shift from standard  
52  
53 contracts (i.e., open-ended full-time contracts) towards more atypical and flexible  
54  
55  
56  
57  
58  
59  
60

1  
2  
3 contracts such as part-time work, temporary work, temporary agency work, zero hour  
4  
5 contracts, "gig" work arrangements and self-employment (1, 4, 6, 13, 14). Non-standard  
6  
7 work can also include holding multiple jobs (15). A comprehensive term used to  
8  
9 describe forms of non-standard employment is "precarious employment" (16). These  
10  
11 types of employments usually have a higher risk of insecurity – precariousness – , often  
12  
13 characterized by low pay and lower levels of social security and rights as compared to  
14  
15 standard contracts (3, 4, 13). However, these elements are not exclusively found in non-  
16  
17 standard employments *per se*, but could also exist within a standard employment,  
18  
19 meaning that employees in a standard employment also are at risk of experiencing  
20  
21 precariousness (13, 17, 18). Thereby, it is important to move beyond a simplistic  
22  
23 categorical grouping of employment, such as temporary vs. permanent, and instead  
24  
25 work towards a multidimensional approach in order to better capture and understand  
26  
27 precarious employment (15, 18). As of yet there is no universally accepted definition of  
28  
29 precarious employment, although several definitions have been proposed. Commonly,  
30  
31 definitions of precarious employment are multidimensional and include several aspects  
32  
33 related to the employer-employee relation (2, 5, 19), such as temporariness/insecurity  
34  
35 of the employment contract, vulnerability, wages and limited social protection and  
36  
37 rights (3, 4, 13, 16, 20-23).  
38  
39  
40  
41  
42  
43  
44  
45  
46  
47  
48  
49  
50  
51  
52  
53

### 54 **The Employment Precariousness Scale (EPRES)**

55  
56 EPRES is a Spanish, multidimensional scale, developed to measure degree of precarious  
57  
58 employment among waged and salaried workers (7). EPRES is comprised of 22 items  
59  
60

1  
2  
3 and six subscales corresponding to six dimensions: 'temporariness' (contract duration;  
4 two items), 'wages' (low or insufficient; possible economic deprivation; three items),  
5  
6  
7  
8 'disempowerment' (level of negotiation of employment conditions; two items),  
9  
10  
11 'vulnerability' (defenselessness to authoritarian treatment; five items), 'rights'  
12  
13 (entitlement to workplace rights and social security benefits; four items) and 'exercise  
14  
15 rights' (powerlessness, in practice, to exercise workplace rights; six items) (7, 8). EPRES  
16  
17 items are scored on a 5-point or 3-point scale, depending on item, and all items taken  
18  
19 together will give a global score ranging between 0 (least precarious) and 4 (most  
20  
21 precarious) (19). EPRES has demonstrated good acceptability, good internal  
22  
23 consistency and evidence of construct validity in Spanish and Chilean populations (7,  
24  
25 8). The original EPRES scale was revised in 2015 (hereafter known as EPRES-2010), which  
26  
27 showed good metric properties and improved sensitivity to worker vulnerability and  
28  
29 employment stability (9).  
30  
31  
32  
33  
34  
35  
36  
37  
38  
39  
40

### 41 **Precarious employment in Sweden**

42  
43 Reports show that the Swedish labor market is growing increasingly more insecure (24).  
44  
45 Sweden has, according to some definitions, one of the smallest proportions of  
46  
47 precarious employees in Europe (21). However, in the perspective of Nordic countries,  
48  
49 Sweden has the highest proportion of precarious employed individuals (25) and the  
50  
51 highest proportion of fixed-term employment contracts (26). The latter has been  
52  
53 around 15-17% since the late 1990's. However, there has been a shift within this group  
54  
55 where longer-term positions have been replaced by a higher proportion of on-demand  
56  
57  
58  
59  
60



1  
2  
3 employees and day laborers, which are more precarious by nature (24, 27, 28).  
4  
5 Especially women (19%, compared to 15% among men), 16-24 year olds (56%,  
6  
7 compared to 21% among 25-34 year olds and 9% among 35-44 year olds), and foreign  
8  
9 born (24%, compared to 15% among individuals born in Sweden) are likely of holding  
10  
11 a temporary employment (28). Around 10% of the employees in Sweden are not  
12  
13 covered by collective bargaining agreements and around 9% have multiple jobs. The  
14  
15 latter has seen an increase with 1.5% since 2005 (27). According to a definition by the  
16  
17 Swedish labor policy council, the group of atypical employees is constituted by those  
18  
19 that fulfil one of the following: not being covered by a collective bargaining agreement,  
20  
21 have a temporary employment, are employed by a temp agency or are self-employed,  
22  
23 have their own company, hold multiple jobs or are working in the informal sector. This  
24  
25 group of atypical workers is estimated to be around 35-39% of the Swedish workforce  
26  
27 (27).  
28  
29  
30  
31  
32  
33  
34  
35  
36  
37

38 Thus, a translation and adaptation of EPRES to Swedish and the Swedish context  
39  
40 is an important step in the direction to fully comprehend the distribution and health  
41  
42 consequences of precarious employment in Swedish population.  
43  
44  
45  
46  
47

## 48 **Aim**

49  
50  
51 The aim of this study was to translate the EPRES-2010 into Swedish, adapt it to the  
52  
53 Swedish context, and to assess the psychometric properties of the Swedish EPRES.  
54  
55  
56  
57

## 58 **METHOD**

1  
2  
3 In order to fulfil the study aims, the EPRES-2010 was first translated into Swedish and  
4  
5 subsequently adapted to suit the Swedish context (hereafter known as EPRES-Se).  
6  
7  
8 Thereafter, EPRES-Se was piloted and implemented as a part of the survey used in the  
9  
10 research project Precarious Employment in Stockholm (PREMIS).  
11  
12  
13  
14  
15

## 16 **Translation and adaptation of EPRES**

17  
18  
19 The translation and adaptation process of the EPRES-2010 consisted of five steps: 1.  
20  
21 Translation from Spanish to Swedish; 2. Cultural adaptation to fit the Swedish context;  
22  
23  
24 3. Back translation to Spanish and adjustments; 4. Pilot testing; 5. Final adaptations  
25  
26 based on user feedback in pilot.  
27  
28  
29

30 1. The Spanish version of the revised EPRES-2010 scale, which has been  
31  
32 published elsewhere (9), was translated into Swedish. The translation was done by a  
33  
34 bilingual member of the research team (TB) in close discussion with AV, a native  
35  
36 Spanish speaker with previous experience of validation studies of EPRES.  
37  
38  
39

40 2. Several adaptations of the questionnaire were implemented in order to fit  
41  
42 Swedish labor market conditions. The questionnaire and its translation was discussed  
43  
44 during workshops in the project team, which consisted of Swedish, Spanish and Chilean  
45  
46 researchers within public - and occupational health, as well as within the reference  
47  
48 group, which consisted of labor union members and workers with experience of  
49  
50 precarious employment.  
51  
52  
53  
54  
55  
56  
57  
58  
59  
60

1  
2  
3 3. Several drafts of the Swedish questionnaire were translated back to Spanish  
4  
5 during the adaptation process and discussed until the final translation was decided  
6  
7 upon.  
8  
9

10  
11 4. A two-stage pilot testing was performed: first face-to-face with five volunteers  
12  
13 from the reference group, and thereafter online with six volunteers who were currently  
14  
15 working but without a permanent full-time employment. The latter were also asked to  
16  
17 participate in an evaluation of the survey either via the phone or online.  
18  
19

20  
21 5. With the input from the pilot, a few minor adaptations were made to the EPRES.  
22  
23

24  
25 Further, in order to offer non-Swedish speaking participants an opportunity to  
26  
27 participate in the PREMIS-study, the PREMIS-survey, including the Swedish version of  
28  
29 EPRES, was translated into English by an external, professional, translator. After the  
30  
31 translation, minor changes in terms of style and terminology was made by the research  
32  
33 group. The English translation of the EPRES-Se was not validated in this study, nor has  
34  
35 it been validated in any previous studies.  
36  
37  
38  
39  
40  
41  
42  
43  
44  
45

#### 46 **Implementation of the EPRES-Se**

47  
48 PREMIS is an ongoing, longitudinal, web-based study conducted in Stockholm county,  
49  
50 Sweden, aiming at studying health outcomes of precarious employment. In 2016-2017,  
51  
52 483 non-standard employees were sampled with web-based respondent-driven  
53  
54 sampling (webRDS). WebRDS uses peer-to-peer recruitment to build a sample from  
55  
56 populations that are hard-to-reach and therefore lacks a sampling frame (29).  
57  
58  
59  
60

1  
2  
3 Questionnaire data was collected through an online survey tool specifically developed  
4  
5  
6 for RDS (30). The PREMIS-survey included all the items of the EPRES-Se, questions on  
7  
8 employment type, occupational environment, health outcomes and background. The  
9  
10 survey could be completed in Swedish or English. Inclusion criteria for participants  
11  
12 were: living and/or working in Stockholm County, being aged 18-65 years, having and  
13  
14 indicating a Swedish personal identification number, and having a current  
15  
16 employment. Exclusion criteria were: having a fixed, full-time, employment, being  
17  
18 voluntarily self-employed or being a student. Out of the 483 participants included in  
19  
20 the sample, 68 participants were excluded due to being deemed ineligible after  
21  
22 participation or due to suspected deception, giving a final sample of 415 participants.  
23  
24  
25  
26  
27  
28  
29  
30 The full description of the sampling process for PREMIS has been described elsewhere  
31  
32 (31).  
33  
34  
35

### 36 **Statistical analysis**

37  
38 Item descriptive statistics (mean, standard deviations, response frequencies, missing  
39  
40 responses and Pearson item-subscale correlations) and scale descriptive statistics  
41  
42 (mean, standard deviations, missing items, range, floor and ceiling effects, and  
43  
44 reliability (Cronbach's alpha coefficient) were assessed for the entire sample.  
45  
46  
47 Participants answering "No answer" on the question on income (question three in  
48  
49 EPRES-Se) were excluded from the analyses of this question due to the ambiguity of  
50  
51 the response alternative. Exploratory factor analysis was conducted in order to  
52  
53 determine the underlying factor structure of the data. Principal axis factoring, with  
54  
55 varimax rotation, extracting eigenvalues >1 was used. Sub-analyses were conducted  
56  
57  
58  
59  
60

1  
2  
3 without informal workers. Further, as the sample was recruited with respondent-driven  
4  
5 sampling (RDS), weighted analyses were conducted in addition to the unweighted  
6  
7 analyses. RDSII weights (32) were calculated in RDS Analyst 0.42 for Windows (Los  
8  
9 Angeles, CA). The results from these analyses will be shown in full in the supplementary  
10  
11 material. All analyses were performed using SPSS version 23 (IBM SPSS Statistics for  
12  
13  
14  
15  
16  
17 Windows, Version 23. Armonk, NY:IBM Corp).

## 21 **Ethical considerations**

22  
23  
24 Permission from the Regional Ethics Committee of Stockholm was given for the study,  
25  
26 with dnr: 2016/1291-31/5. Informed consent was attained from all participants by the  
27  
28 respondent clicking "Yes" to the question "I understand the information given above  
29  
30 and want to participate".  
31  
32  
33  
34  
35  
36  
37

## 38 **Results**

### 41 **Adaptations of EPRES-Se**

42  
43 The following adaptations were made to the EPRES-Se in comparison with EPRES-2010.

- 44  
45 (1) The response alternatives in 'temporariness' were stated as categories of duration,  
46  
47 as opposed to a free text value of number of days, months or years in EPRES-2010,  
48  
49 in order to increase usability. Further, in the first question, response options "I do  
50  
51 not have a contract" was added in order to capture informal work and "Do not  
52  
53 know" was added in order to capture poor contractual relationship.  
54  
55  
56  
57  
58  
59  
60

- 1  
2  
3 (2) In 'wages', the question of income was presented in local currency (SEK) and  
4  
5 intervals were set to ~300 EUR as the 150-200 EUR intervals used in the EPRES-2010  
6  
7 version were perceived as too narrow. In EPRES-2010, intervals were 150 EUR - 200  
8  
9 EUR below a monthly income of 1200 EUR, and 300 EUR above an income of 1201  
10  
11 EUR.  
12  
13  
14  
15  
16 (3) Items on 'disempowerment' were adapted to reflect Swedish collective bargaining  
17  
18 agreements: The two response alternatives where working conditions were decided  
19  
20 unilaterally by the employer were merged in the Swedish adaptation. As some  
21  
22 workers, especially freelancers, are given a fixed budget with no hours specified, the  
23  
24 response alternative "Not applicable. I work project-based" was added for the  
25  
26 question on how salary was decided upon,  
27  
28  
29  
30  
31  
32 (4) One of the items in 'vulnerability', "afraid to demand better working conditions...",  
33  
34 was taken from the original EPRES-scale (7) according to the recommendations  
35  
36 made by Vives et al 2015 (9).  
37  
38  
39  
40 (5) In 'rights', the question on pension, which contained both pension due to old age  
41  
42 and disability in EPRES-2010, was split in two as these are distinct systems unrelated  
43  
44 to one another in the Swedish context. Retirement pension (i.e., pension due to old  
45  
46 age) was kept in EPRES-Se and disability pension was removed. However, a new  
47  
48 item assessing the right to sickness benefit was added in the subscale instead.  
49  
50  
51  
52  
53 (6) In 'exercise of rights' the item on taking a day off for family reasons was clarified by  
54  
55 adding "care of a sick child, care of a sick relative etc." within parentheses.  
56  
57  
58  
59  
60

## EPRES-Se

The final version of EPRES-Se consisted of a total of 23 items and six dimensions: 'temporariness' (two items), 'wages' (three items), 'disempowerment' (two items), 'vulnerability' (five items), 'rights' (five items) and 'exercise rights' (six items). As in the EPRES-2010, the response scales were 5-point ordinal scales for 'temporariness' and 'wages', 5-point frequency scales for 'vulnerability' and 'exercise rights', and 3-point categorical scales for 'disempowerment' and 'exercise rights'. See EPRES-Se in supplementary material A.

## Coding of EPRES-Se

Similarly as EPRES-2010, subscale scores were computed as averages and transformed into a 0-4 scale. The global EPRES score is the average of the six subscales, ranging from 0-4, where 0 represent the lowest level of precariousness and 4 represent the highest level of precariousness.

For questions in 'temporariness', response options were coded slightly different compared to EPRES-2010 in order to accommodate the changes made in the Swedish version. For instance, in the question of duration of contract, response options "Do not have a contract" and "Do not know" were coded as 4 (most precarious), in comparison with the Spanish version where a contract length of less than six months was coded as 4. In the question on income, intervals were larger and consistent in size, as compared to the Spanish version. The cut-offs for income were based on the Swedish median net income for 2016, which was just above 18000 SEK for individuals 20-64 years of age

1  
2  
3 (33). The merging of items in 'disempowerment' did not affect coding. The coding of  
4  
5  
6 the individual items along with the English translation of EPRES-Se can be found in the  
7  
8  
9 supplementary material B.

### 10 11 12 13 14 **Issues leading to recoding of 'temporariness' dimension**

15  
16 When conducting the data analyses it was revealed that 79% (n=139) of the  
17  
18 respondents answering 'indefinitely' to the EPRES question on contract length ("How  
19  
20 long is your current employment contract valid?") also answered that they were  
21  
22 employed on demand/by the hour on a question assessing employment type included  
23  
24 in the PREMIS-survey. We suspected that this combination could be a type of "zero  
25  
26 hour" contract, in which the employer is not required to offer the employee any fixed  
27  
28 number of hours of work at all per day, week or month (26). Thereby, this type of  
29  
30 employment situation could be regarded as contingent with a high degree of  
31  
32 precariousness. This was confirmed as the group indicating an indefinite contract  
33  
34 length *and* on-demand/by the hour employment, were most similar (in terms of the  
35  
36 other EPRES subscales) to employees with a contract lasting less than 1 month and  
37  
38 least alike employees with a fixed-term contract >2 years. Consequently, we re-coded  
39  
40 the group with an indefinite contract *and* on demand/by the hour-employment from  
41  
42 0 to 3 (i.e., the same coding as the response alternative <1 month contract). Those with  
43  
44 any other employment type and an indefinite contract (n=36) remained coded as 0.  
45  
46  
47  
48  
49  
50  
51  
52  
53  
54  
55  
56 See results of subscale-average comparisons in the supplementary material C.  
57  
58  
59  
60



## Psychometric properties of EPRES-Se

The demographic characteristics of the sample is shown in Table 1. The sample consisted of a larger proportion 25-29-year olds (45%) compared to the other age-groups, and a larger proportion women (54%) as compared to men. Further, the sample was dominated by workers employed on demand/by the hour (59%).

Table 2 shows the item-descriptive statistics. There was a small proportion of missing values (below 5%). Item means were similar within subscales, with the greatest mean difference found within 'wages' (item mean difference = 1.4). All response options within the items were used by participants, although to a varying extent. Item-subscale correlations were around 0.6-0.8 in 'vulnerability' and 'exercise of rights'; and around 0.4-0.6 in 'wages' and 'rights'. There was a weak correlation between item and subscale in 'disempowerment' and no correlation between item and subscale in 'temporariness'. In the latter, all items correlated higher with their corresponding subscale compared to other subscales.

**Table 1. Demographic characteristics of the study population (frequencies and percentages), N=415**

|                   |                                  | N   | %  |
|-------------------|----------------------------------|-----|----|
| <b>Age</b>        | 18-24                            | 122 | 29 |
|                   | 25-29                            | 185 | 45 |
|                   | 30-64                            | 108 | 26 |
| <b>Sex</b>        | Male                             | 190 | 46 |
|                   | Female                           | 225 | 54 |
| <b>Employment</b> | Temporary employment             | 121 | 29 |
|                   | Employed on demand/by the hour   | 243 | 59 |
|                   | Self-employed (involuntary)      | 13  | 3  |
|                   | Intern                           | 2   | 1  |
|                   | Part-time employed (involuntary) | 36  | 9  |

1  
2  
3  
4  
5  
6 Table 3 shows the scale descriptive statistics. The subscale mean scores ranged  
7  
8 between 1.5 and 2.3, with a global average of 1.9. The proportion of participants with  
9 any missing values in the subscales were around 1%, except in the case of 'wages'  
10 where it was 2.2%. The latter also included participants answering "No answer" (n=9).  
11  
12 Subscale scores ranged between 0-4, and global scale score ranged between 0.09-3.07.  
13  
14 Both floor and ceiling effects were generally low (< 5%), with floor effects being highest  
15 for 'disempowerment' (9.2%) and 'vulnerability' (11.7%), and ceiling effects for 'rights'  
16 (18.0%). Cronbach's alpha coefficients were around 0.7 or higher for 'wages',  
17 'vulnerability', 'rights' and 'exercise of rights'. Only 'temporariness' exhibited a  
18 Cronbach's alpha coefficient close to 0. The global alpha coefficient was 0.83.  
19  
20  
21  
22  
23  
24  
25  
26  
27  
28  
29  
30  
31

32 The exploratory factor analysis extracted six factors with eigenvalues above 1  
33 (eigenvalues = 5.3; 3.2; 2.3; 1.6; 1.3; 1.1). These factors were the same as in EPRES-2010,  
34 thereby confirming the original factor structure. Together, the six factors explained  
35 64.1% of the variance. The six factors and their rotated factor loadings are shown in  
36 Table 4. All loadings were above 0.35, except in the case of "length of contract".  
37  
38  
39  
40  
41  
42  
43  
44  
45

46 Sub-analyses were conducted in order to investigate the potential effect of  
47 including informal workers in the sample. Removing informal workers (n=35) had  
48 minor influence on the correlation ( $r=0.002$ ,  $p=0.974$ ) and reliability (0.003). However,  
49 in the factor analysis seven factors with eigenvalues >1 emerged (5.3; 3.2; 2.3; 1.6; 1.3;  
50 1.1; 1.0), explaining 68.5% of the variance. The seventh factor was caused by a split of  
51 the temporariness dimension, grouping items on length of contract (duration) and time  
52  
53  
54  
55  
56  
57  
58  
59  
60

1  
2  
3 working for employer (tenure) in separate factors, with factor loadings of 0.34 and 0.42  
4  
5  
6 respectively.  
7

8 The weighted population sample results remained virtually the same for item-  
9  
10 subscale correlations, Cronbach's alpha coefficients, floor and ceiling effects, as well  
11  
12 as factor loadings from the exploratory factor analysis of EPRES-Se, and did thereby  
13  
14 not affect the interpretation of the results. See the weighted results in table 1-4 in  
15  
16  
17  
18  
19 Supplementary material D.  
20  
21  
22  
23  
24  
25  
26  
27  
28  
29  
30  
31  
32  
33  
34  
35  
36  
37  
38  
39  
40  
41  
42  
43  
44  
45  
46  
47  
48  
49  
50  
51  
52  
53  
54  
55  
56  
57  
58  
59  
60

**Table 2. Item descriptive statistics and Pearson item-subscale correlations of EPRES-Se**

| Item                              | Missing % <sup>1</sup> | Mean | SD <sup>2</sup> | Response value frequency (%) <sup>3</sup> |            |            |            |           | Pearson item subscale correlations <sup>4</sup> |             |             |             |             |      |
|-----------------------------------|------------------------|------|-----------------|-------------------------------------------|------------|------------|------------|-----------|-------------------------------------------------|-------------|-------------|-------------|-------------|------|
|                                   |                        |      |                 | 0                                         | 1          | 2          | 3          | 4         | T                                               | W           | D           | V           | R           | ER   |
| <b>Temporariness<sup>5</sup></b>  |                        |      |                 |                                           |            |            |            |           |                                                 |             |             |             |             |      |
| Length of contract                | 0.0                    | 2.6  | 1.1             | 36 (8.7)                                  | 24 (5.8)   | 75 (18.1)  | 228 (54.9) | 52 (12.5) | -                                               | 0.04        | 0.09        | 0.06        | 0.08        | 0.04 |
| Time working empl.                | 0.0                    | 2.1  | 0.9             | 17 (4.1)                                  | 92 (22.2)  | 171 (41.2) | 119 (28.7) | 16 (3.9)  | <b>0.04</b>                                     | -           | 0.06        | 0.10        | -           | 0.31 |
|                                   |                        |      |                 |                                           |            |            |            |           | <b>0.04</b>                                     |             |             | 0.04        |             |      |
| <b>Wages</b>                      |                        |      |                 |                                           |            |            |            |           |                                                 |             |             |             |             |      |
| Income monthly                    | 2.2                    | 2.4  | 1.2             | 43 (10.6)                                 | 45 (11.1)  | 87 (21.4)  | 171 (42.1) | 60 (14.8) | 0.09                                            | <b>0.39</b> | 0.13        | -           | 0.29        | 0.18 |
| Cover basic need                  | 1.0                    | 0.8  | 0.9             | 175 (42.6)                                | 171 (41.6) | 44 (10.7)  | 14 (3.4)   | 7 (1.7)   | -                                               | <b>0.60</b> | 0.08        | 0.21        | 0.13        | 0.27 |
| Cover unforeseen expen.           | 1.0                    | 1.8  | 1.1             | 60 (14.6)                                 | 113 (27.5) | 136 (33.1) | 70 (17.0)  | 32 (7.8)  | 0.02                                            | <b>0.55</b> | 0.08        | 0.39        | 0.14        | 0.26 |
| <b>Disempowerment<sup>5</sup></b> |                        |      |                 |                                           |            |            |            |           |                                                 |             |             |             |             |      |
| Working hour settled              | 0.0                    | 2.1  | 1.2             | 84 (20.2)                                 | 8 (1.9)    | 110 (26.5) | 190 (45.8) | 23 (5.5)  | 0.13                                            | 0.17        | <b>0.34</b> | 0.08        | 0.24        | 0.21 |
| Salary settled                    | 0.0                    | 2.2  | 1.2             | 77 (18.6)                                 | 8 (1.9)    | 101 (24.3) | 210 (50.6) | 19 (4.6)  | 0.07                                            | 0.03        | <b>0.34</b> | 0.02        | 0.13        | 0.10 |
| <b>Vulnerability</b>              |                        |      |                 |                                           |            |            |            |           |                                                 |             |             |             |             |      |
| Demand work cond.                 | 1.0                    | 1.6  | 1.2             | 79 (19.2)                                 | 129 (31.4) | 113 (27.5) | 63 (15.3)  | 27 (6.6)  | 0.01                                            | 0.13        | 0.09        | <b>0.75</b> | 0.04        | 0.29 |
| Unfair treatment                  | 1.0                    | 1.3  | 1.1             | 114 (27.7)                                | 159 (38.7) | 67 (16.3)  | 50 (12.2)  | 21 (5.1)  | -                                               | 0.12        | 0.08        | <b>0.79</b> | -           | 0.26 |
|                                   |                        |      |                 |                                           |            |            |            |           | 0.03                                            |             |             |             | 0.01        |      |
| Afraid fired                      | 1.0                    | 1.5  | 1.2             | 106 (25.8)                                | 130 (31.6) | 81 (19.7)  | 60 (14.6)  | 34 (8.3)  | 0.06                                            | 0.20        | 0.10        | <b>0.78</b> | 0.04        | 0.35 |
| Treated authoritarian             | 1.0                    | 1.3  | 1.1             | 107 (26.0)                                | 160 (38.9) | 87 (21.2)  | 36 (8.8)   | 21 (5.1)  | -                                               | 0.20        | -           | <b>0.63</b> | 0.02        | 0.23 |
|                                   |                        |      |                 |                                           |            |            |            |           | 0.04                                            |             | 0.01        |             |             |      |
| Easily replaced                   | 1.0                    | 1.6  | 1.3             | 91 (22.1)                                 | 124 (30.2) | 92 (22.4)  | 55 (13.4)  | 49 (11.9) | 0.06                                            | 0.22        | 0.01        | <b>0.74</b> | 0.04        | 0.27 |
| <b>Rights</b>                     |                        |      |                 |                                           |            |            |            |           |                                                 |             |             |             |             |      |
| Right parental leave              | 1.2                    | 1.2  | 0.8             | 100 (24.4)                                | 130 (31.7) | 180 (43.9) |            |           | 0.18                                            | 0.16        | 0.25        | 0.05        | <b>0.59</b> | 0.16 |
| Right retirement                  | 1.2                    | 1.2  | 0.8             | 107 (26.1)                                | 113 (27.6) | 190 (46.3) |            |           | 0.26                                            | 0.22        | 0.22        | 0.07        | <b>0.60</b> | 0.16 |
| Right unemployment                | 1.2                    | 1.0  | 0.9             | 156 (38.0)                                | 100 (24.4) | 154 (37.6) |            |           | 0.15                                            | 0.24        | 0.14        | -           | <b>0.60</b> | 0.09 |
|                                   |                        |      |                 |                                           |            |            |            |           |                                                 |             |             | 0.01        |             |      |
| Right severance pay               | 1.2                    | 1.4  | 0.6             | 20 (4.9)                                  | 223 (54.4) | 167 (40.7) |            |           | 0.11                                            | 0.06        | 0.03        | -           | <b>0.48</b> | 0.03 |
|                                   |                        |      |                 |                                           |            |            |            |           |                                                 |             |             | 0.02        |             |      |
| Right sickness benefits           | 1.2                    | 1.0  | 0.9             | 160 (39.0)                                | 110 (26.8) | 140 (34.1) |            |           | 0.26                                            | 0.18        | 0.16        | 0.03        | <b>0.53</b> | 0.12 |
| <b>Exercise of rights</b>         |                        |      |                 |                                           |            |            |            |           |                                                 |             |             |             |             |      |

|                     |     |     |     |            |            |            |           |           |      |      |      |      |      |             |
|---------------------|-----|-----|-----|------------|------------|------------|-----------|-----------|------|------|------|------|------|-------------|
| Take weekend off    | 1.0 | 1.6 | 1.2 | 86 (20.9)  | 93 (22.6)  | 154 (37.5) | 48 (11.7) | 30 (7.3)  | -    | 0.23 | 0.16 | 0.18 | 0.10 | <b>0.62</b> |
|                     |     |     |     |            |            |            |           |           | 0.01 |      |      |      |      |             |
| Take vacation       | 1.2 | 1.9 | 1.1 | 50 (12.2)  | 88 (21.5)  | 163 (39.8) | 77 (18.8) | 32 (7.8)  | 0.14 | 0.22 | 0.19 | 0.30 | 0.15 | <b>0.68</b> |
| Take day off        | 1.2 | 1.6 | 1.1 | 88 (21.5)  | 85 (20.7)  | 166 (40.5) | 50 (12.2) | 21 (5.1)  | 0.15 | 0.19 | 0.21 | 0.25 | 0.16 | <b>0.75</b> |
| Take day off, pers. | 1.0 | 1.9 | 1.2 | 63 (15.3)  | 78 (19.0)  | 159 (38.7) | 69 (16.8) | 42 (10.2) | 0.11 | 0.21 | 0.06 | 0.36 | 0.07 | <b>0.74</b> |
| Sick leave          | 1.2 | 1.6 | 1.2 | 98 (23.9)  | 74 (18.0)  | 163 (39.8) | 50 (12.2) | 25 (6.1)  | 0.06 | 0.22 | 0.19 | 0.26 | 0.12 | <b>0.69</b> |
| Go to doctor        | 1.0 | 1.1 | 1.1 | 140 (34.1) | 126 (30.7) | 106 (25.8) | 25 (6.1)  | 14 (3.4)  | 0.11 | 0.26 | 0.08 | 0.25 | 0.14 | <b>0.64</b> |

<sup>1</sup> Proportion of participants with any missing item; <sup>2</sup> SD=Standard Deviation; <sup>3</sup> Frequency (%) of participants indicating the specific response. 0 indicates the lowest precariousness score, 4 indicating the highest precariousness score. <sup>4</sup> Corrected for overlap, i.e., item is removed from the corresponding subscale. T=Temporariness; W=Wages; D=Disempowerment; V=Vulnerability; R=Rights; ER=Exercise rights. <sup>5</sup> Inter-item correlations

For peer review only

**Table 3. Scale descriptive statistics: range, mean, standard deviation (SD), floor and ceiling effects and Cronbach's alpha coefficient**

| Subscale           | Items | Mean | SD  | Missing (%) <sup>1</sup> | Obs. range | Floor % <sup>2</sup> | Ceiling % <sup>2</sup> | Cronbach's alpha |
|--------------------|-------|------|-----|--------------------------|------------|----------------------|------------------------|------------------|
| Temporariness      | 2     | 2.3  | 0.7 | 0.0                      | 0-4        | 0.5                  | 1.0                    | -0.08            |
| Wages              | 3     | 1.6  | 0.8 | 3.1                      | 0-4        | 4.2                  | 0.7                    | 0.69             |
| Disempowerment     | 2     | 2.2  | 1.0 | 0.0                      | 0-4        | 9.2                  | 1.4                    | 0.50             |
| Vulnerability      | 5     | 1.5  | 1.0 | 1.0                      | 0-4        | 11.7                 | 1.9                    | 0.89             |
| Rights             | 5     | 2.3  | 1.2 | 1.2                      | 0-4        | 2.9                  | 18.0                   | 0.78             |
| Exercise of rights | 6     | 1.6  | 0.9 | 1.2                      | 0-4        | 6.8                  | 1.0                    | 0.88             |
| EPRES-se           | 23    | 1.9  | 0.5 | 3.4                      | 0.09-3.07  | 0.2                  | 0.2                    | 0.83             |

<sup>1</sup> Proportion of participants with any missing item

<sup>2</sup> Proportion of participants with lowest (floor) and highest (ceiling) EPRES-Se scores

**Table 4. Factor loadings from exploratory factor analysis of the EPRES-Se**

|                         | Factor          |               |             |             |                |               |
|-------------------------|-----------------|---------------|-------------|-------------|----------------|---------------|
|                         | Exercise rights | Vulnerability | Rights      | Wages       | Disempowerment | Temporariness |
| <b>Temporariness</b>    |                 |               |             |             |                |               |
| Length of contract      |                 |               |             |             |                | <b>0.13</b>   |
| Time working empl.      | 0.12            |               | 0.35        |             |                | <b>-0.37</b>  |
| <b>Wages</b>            |                 |               |             |             |                |               |
| Income monthly          | 0.15            | -0.16         | 0.24        | <b>0.49</b> |                | 0.35          |
| Cover basic need        | 0.18            | 0.13          |             | <b>0.71</b> |                |               |
| Cover unforeseen expen. | 0.12            | 0.32          |             | <b>0.79</b> |                | -0.11         |
| <b>Disempowerment</b>   |                 |               |             |             |                |               |
| Working hour settled    | 0.15            |               | 0.19        |             | <b>0.54</b>    | 0.16          |
| Salary settled          |                 |               |             |             | <b>0.58</b>    |               |
| <b>Vulnerability</b>    |                 |               |             |             |                |               |
| Demand work cond.       | 0.14            | <b>0.80</b>   |             |             |                |               |
| Unfair treatment        | 0.11            | <b>0.84</b>   |             |             |                |               |
| Afraid fired            | 0.20            | <b>0.80</b>   |             |             |                |               |
| Treated authoritarian   | 0.11            | <b>0.66</b>   |             | 0.12        |                | 0.13          |
| Easily replaced         | 0.12            | <b>0.77</b>   |             | 0.15        |                |               |
| <b>Rights</b>           |                 |               |             |             |                |               |
| Right parental leave    |                 |               | <b>0.67</b> |             | 0.22           |               |
| Right retirement        |                 |               | <b>0.69</b> |             | 0.16           |               |
| Right unemployment      |                 |               | <b>0.70</b> | 0.11        |                | 0.28          |
| Right severance pay     |                 |               | <b>0.55</b> |             | -0.11          |               |
| Right sickness benefits |                 |               | <b>0.59</b> |             | 0.12           |               |
| <b>Exercise rights</b>  |                 |               |             |             |                |               |

|   |                     |             |      |      |      |       |
|---|---------------------|-------------|------|------|------|-------|
| 1 |                     |             |      |      |      |       |
| 2 |                     |             |      |      |      |       |
| 3 | Take weekend off    | <b>0.65</b> |      |      | 0.11 | 0.14  |
| 4 | Take vacation       | <b>0.70</b> | 0.18 |      |      | -0.13 |
| 5 | Take day off        | <b>0.80</b> | 0.10 | 0.10 |      | -0.13 |
| 6 | Take day off, pers. | <b>0.78</b> | 0.24 |      |      | -0.11 |
| 7 | Sick leave          | <b>0.72</b> | 0.11 |      | 0.12 | 0.14  |
| 8 | Go to doctor        | <b>0.66</b> | 0.11 |      | 0.13 |       |
| 9 |                     |             |      |      |      |       |

Table showing factor loadings >0.1

## DISCUSSION

### Key findings and summary

The scale generally performed well, with a small proportion of missing values across all subscales, usage of all response options and good global reliability. The factor structure established in the Spanish EPRES-2010 (9) was confirmed. The subscales 'vulnerability', 'wages', 'rights' and 'exercise of rights' generally worked well in the Swedish context, with high item-subscale correlations, subscale reliability and factor loadings. However, 'temporariness' did not perform as expected and would need revision. In addition, although 'disempowerment' showed acceptable psychometric properties, the subscale might benefit from additional adaptation.

### 'Temporariness'

This subscale proved problematic due to several reasons: in terms of factor loading for the item assessing contractual length, the zero item-subscale correlations and negative Cronbach's alpha coefficient. On the basis of these results, we argue that the temporariness dimension should be redesigned. There are multiple reasons for this argument:

1  
2  
3 First, the very poor psychometric properties indicate that the subscale does  
4 not function in the current context. This was further highlighted when removing  
5  
6 informal workers, a mere number of 35 participants, splitting the items in  
7  
8 'temporariness' in two – showing greater factor loadings and explained variance.  
9  
10 Thus, neither the adapted version nor the version without informal workers were  
11  
12 acceptable.  
13  
14  
15  
16  
17  
18

19 Second, we found that the type of employment in combination with duration  
20  
21 of contract was associated with the precariousness of the employee. This in addition  
22  
23 to the previous results, highlight that the duration-item is inadequate both on its own  
24  
25 and together with the tenure-item, in assessing temporariness. Combining duration  
26  
27 and type of employment in an item could be an alternative to capture temporariness.  
28  
29 However, the continuous flexibilization of the labor market challenge the standard  
30  
31 employment relationship (5), moving towards a future in which the permanent full-  
32  
33 time employment situation might no longer represent the norm and the "gold  
34  
35 standard". Therefore, incorporating an item on employment type might not be  
36  
37 feasible and as its rating and quantification might prove (increasingly) difficult.  
38  
39  
40  
41  
42  
43  
44  
45

46 Third, it is not necessarily so that the relationship between tenure and  
47  
48 temporariness is linear, i.e., that the shorter the tenure the greater the temporariness.  
49  
50 In the current context, the Swedish legislation (the Employment Protection Act SFS  
51  
52 1982:80) prevents an employer to hire an employee for more than two years during a  
53  
54 five-year period (consecutive or in shorter repeated contracts) (34). Thereby, an  
55  
56 employee with an 18-month tenure might be worse off than an employee with a 3-  
57  
58  
59  
60



1  
2  
3 month tenure in the experience of temporariness. Further, approximately 50% of  
4  
5  
6 temporary employees in Sweden has had repeated contracts with the same employer  
7  
8 (28). This is likely to contribute to the non-linear association between tenure and  
9  
10 duration of contract. In order to adapt EPRES-Se further to the Swedish context, we  
11  
12 suggest that further work with the EPRES-Se consider whether the tenure-item could  
13  
14 be combined with an item assessing the number of repeated contracts with the same  
15  
16 employer or an item assessing how often during a specific time interval the  
17  
18 employment contract is up for renewal. It could also be explored whether the tenure-  
19  
20 item could be replaced with an item assessing the remaining duration of the contract.  
21  
22  
23  
24  
25

26  
27 On the basis of this discussion, we suggest that a future development of  
28  
29 EPRES-Se takes a novel outlook on the 'temporariness' dimension and includes an  
30  
31 evaluation of a number of new items in a population of both standard and non-  
32  
33 standard employees.  
34  
35  
36  
37  
38  
39

#### 40 **'Wages'**

41  
42  
43 The income-item showed a factor loading of 0.49, and a correlation of 0.39 with the  
44  
45 items assessing how well the income covers basic needs and unforeseen expenses.  
46  
47 Previous studies report similar findings for this item (7-9). One explanation to these  
48  
49 results is the quantitative nature of the income-item compared to the other items. The  
50  
51 majority, 57%, of the participants scored a precariousness level of 3 or 4 on income,  
52  
53 which is not surprising as the sample is constituted by young non-standard employees.  
54  
55 However, only 5% and 25% of the sample scored a precariousness level of 3 or 4 on  
56  
57  
58  
59  
60

1  
2  
3 the other two items respectively. How well one can cover basic needs and unforeseen  
4 expenses could depend on more than income, such as family support. Approximately  
5  
6 24% of adults aged 20-27 years in Sweden still live at home. This figure is more than  
7  
8 50% in the majority of municipalities in large city regions. About half of those living at  
9  
10 home pay nothing in rent (35). As 74% of the sample is between 18-29 years old, it is  
11  
12 likely that some of the participants still live at home and receive help from their parents.  
13  
14 A more diverse sample in terms of employment could potentially have increased the  
15  
16 item-subscale correlation as we would expect more participants with higher income.  
17  
18  
19  
20  
21  
22  
23

24  
25 Aside from the income-item, the other item-subscale correlations and the  
26  
27 subscale reliability were acceptable and only a fraction of the sample did not provide  
28  
29 an answer to the item on income (2.2%). Therefore, as in the other EPRES scales, we  
30  
31 believe the subscale can be used in its current form in future studies.  
32  
33  
34  
35  
36  
37

### 38 **'Disempowerment'**

39  
40 The items in 'disempowerment' had acceptable item-subscale correlations and  
41  
42 reliability. However, some response options ("my working hours/salary was decided  
43  
44 within my working team" and "do not know") were hardly used at all in, indicating that  
45  
46 these options might not be appropriate for the current population in the Swedish  
47  
48 context. Further, the remaining response options were also inadequate from an  
49  
50 adaptational point of view. For example, the working hours/salary being in line with  
51  
52 collective bargaining agreements does not imply that the working hours/salary was not  
53  
54 set by the employer; these options are not mutually exclusive. In a revised EPRES-Se,  
55  
56  
57  
58  
59  
60

1  
2  
3 the disempowerment-items would benefit from revision and clarification. Combining  
4  
5 response options not mutually exclusive could be considered as one way of improving  
6  
7 the subscale, such as "my working hours/salary are in accordance with Swedish law  
8  
9 and the collective agreement, decided by my employer" and "my working hours/salary  
10  
11 are not in accordance with Swedish law and the collective agreement, decided by my  
12  
13 employer".  
14  
15  
16  
17  
18  
19  
20  
21

## 22 **'Rights'**

23  
24 The new item assessing sickness benefit had an acceptable item-subscale correlation  
25  
26 and factor loading, similar to the other item-subscale correlations and factor loadings  
27  
28 in the subscale, Further, the subscale reliability was good. Taken together, these results  
29  
30 point towards that the new item worked well in the subscale.  
31  
32  
33  
34  
35  
36  
37

## 38 **Limitations and generalizability**

39  
40 This study finds strength in the fact that it is the first study translating and adapting  
41  
42 EPRES-2010 to the Swedish context. It is the first study to use EPRES to collect data in  
43  
44 Sweden. In addition, this work provides context-specific recommendations for future  
45  
46 research using EPRES-Se. This study is, however, not without limitations.  
47  
48  
49  
50

51 One of the main limitations is the sample. The sample was restricted to  
52  
53 employees with a non-standard employment and the sample was skewed towards on-  
54  
55 demand/by the hour employees. EPRES, however, is developed to measure  
56  
57 precariousness independent of the type of employment (7). By only sampling non-  
58  
59  
60

1  
2  
3 standard employees the scale properties cannot be directly compared to similar studies  
4  
5  
6 as the heterogeneity of the sample is limited. A sample with greater diversity could  
7  
8  
9 have provided better insights as to how the scale behaved. However, as the majority  
10  
11 of non-standard contracts in Sweden are on-demand (27) it is not unlikely that the  
12  
13 distribution would have been similar if conducting the study again, using the same  
14  
15 inclusion criteria. Further, being a convenience sample limits the generalizability of the  
16  
17 results.  
18  
19  
20  
21  
22  
23

## 24 **Conclusion**

25  
26  
27 The study found that the global reliability of the scale was good, that all response  
28  
29 options were used for all items and that there were few missing values. Five out of six  
30  
31 subscales worked well, considering this being the first translation and adaptation, while  
32  
33 one subscale, 'temporariness', did not work at all and would need revision before  
34  
35 implementing the scale in further research. As employment precariousness is an  
36  
37 emergent determinant of health it is important that PE can be properly measured. The  
38  
39 EPRES-Se is an important step in this direction. The researchers therefore encourage  
40  
41 others to continue working with EPRES-Se and to validate it further in populations of  
42  
43 both standard and non-standard employees. In order to enable international  
44  
45 comparisons and multinational studies, similar studies in other European countries are  
46  
47 also called for.  
48  
49  
50  
51  
52  
53  
54  
55  
56  
57  
58  
59  
60

## STATEMENTS

**Author contributions:** The study was conceived by TB and GJ. All authors contributed to the design of the study. TB translated and back-translated the EPRES, AV supported the translation process and examined the back translation. JJ collected the data with support from TB and GJ. JJ and TB conducted the analyses. JJ wrote the draft(s) of the manuscript. All authors reviewed the drafts and provided feedback on its content.

**Acknowledgements:** The authors are grateful to the PREMIS project members and reference group members who provided valuable input during the formative work of the study.

**Author statements:** All of the authors have read and approved of the contents of this manuscript and believes that the manuscript represents honest work. All of the authors have met the ICMJE requirements for authorship. We confirm that the current manuscript has not been published elsewhere and that is it not under consideration by any other journal. The manuscript or any of its content has been presented at a conference.

**Conflict of interest:** The authors declare that there are no conflicts of interest.

**Funding:** This work was supported by grant 2015-00933 from The Swedish Research

1  
2  
3 Council for Health, Working Life and Welfare (FORTE). The funder had no role in study  
4  
5 design, data collection and analysis, decision to publish, or preparation of the  
6  
7 manuscript.  
8  
9

10  
11  
12  
13  
14 **Data sharing:** Data are from the PREMIS study whose authors may be contacted at  
15  
16 [johanna.jonsson@ki.se](mailto:johanna.jonsson@ki.se). Data cannot be made publicly available for ethical and legal  
17  
18 reasons, but could be made available to researchers who meet the criteria for access  
19  
20 to confidential data after approval from the Regional Ethics Committee of Stockholm.  
21  
22  
23  
24  
25  
26  
27  
28  
29  
30  
31  
32  
33  
34  
35  
36  
37  
38  
39  
40  
41  
42  
43  
44  
45  
46  
47  
48  
49  
50  
51  
52  
53  
54  
55  
56  
57  
58  
59  
60

## REFERENCES

1. CSDH. Closing the gap in a generation: Health equity through action on the social determinants of health. Final Report of the Commission on Social Determinants of Health. Geneva: World Health Organization; 2008.
2. Benach J, Vives A, Amable M, et al. Precarious employment: understanding an emerging social determinant of health. *Annu Rev Public Health* 2014;35(1):229-53.
3. Benach J, Muntaner C, Solar O, et al. Employment, work, and health inequalities: a global perspective. Geneva: WHO; 2007.
4. Benach J, Muntaner C. Precarious employment and health: developing a research agenda. *J Epidemiol Community Health* 2007;61(4):276-7.
5. Benach J, Vives A, Tarafa G, et al. What should we know about precarious employment and health in 2025? Framing the agenda for the next decade of research. *Int J Epidemiol* 2016;45(1):232-8.
6. Howard J. Nonstandard work arrangements and worker health and safety. *Am J Ind Med* 2017;60(1):1-10.
7. Vives A, Amable M, Ferrer M, et al. The Employment Precariousness Scale (EPRES): psychometric properties of a new tool for epidemiological studies among waged and salaried workers. *Occup Environ Med* 2010;67(8):548-55.
8. Vives-Vergara A, Gonzalez-Lopez F, Solar O, et al. Precarious employment in Chile: psychometric properties of the Chilean version of Employment Precariousness Scale in private sector workers. *Cad Saude Publica* 2017;33(3):e00156215.
9. Vives A, Gonzalez F, Moncada S, et al. Measuring precarious employment in times of crisis: the revised Employment Precariousness Scale (EPRES) in Spain. *Gac Sanit* 2015;29(5):379-82.
10. Vives A, Amable M, Ferrer M, et al. Employment precariousness and poor mental health: evidence from Spain on a new social determinant of health. *J Environ Public Health* 2013;2013:978656.

- 1  
2  
3 11. Benach J, Julià M, Tarafa G, et al. La precariedad laboral medida de forma  
4 multidimensional: distribución social y asociación con la salud en Cataluña  
5 [Multidimensional measurement of precarious employment: social distribution and its  
6 association with health in Catalonia (Spain)]. *Gac Sanit* 2015;29(5):375-78.  
7  
8  
9  
10
- 11 12. Arnold D, Bongiovi JR. Precarious, Informalizing, and Flexible Work:  
12 Transforming Concepts and Understandings. *Am Behav Sci* 2013;57(3):289-308.  
13  
14
- 15 13. Broughton A, Green M, Rickard C, et al. Precarious employment in Europe.  
16 Strasbourg: European Parliament; 2016.  
17  
18
- 19 14. Muntaner C. Digital Platforms, Gig Economy, Precarious Employment, and the  
20 Invisible Hand of Social Class. *Int J Health Serv* 2018;48(4):597-600.  
21  
22
- 23 15. Vosko LF, Zukewich N, Cranford C. Precarious jobs: A new typology of  
24 employment. *Perspect labour income* 2003;15(4).  
25  
26
- 27 16. Rodgers G, Rodgers J. Precarious jobs in labour market regulation: the growth  
28 of atypical employment in Western Europe: International Labour Organisation; 1989.  
29  
30
- 31 17. Julia M, Vives A, Tarafa G, et al. Changing the way we understand precarious  
32 employment and health: Precarisation affects the entire salaried population. *Safety*  
33 *Science* 2017;100:66-73.  
34  
35
- 36 18. Lewchuk W. Precarious jobs: Where are they, and how do they affect well-  
37 being? *Econ Labour Relat Rev* 2017;28(3):402-19.  
38  
39
- 40 19. Vives A. A multidimensional approach to precarious employment:  
41 measurement, association with poor mental health and prevalence in the Spanish  
42 workforce: Universitat Pompeu Fabra; 2010.  
43  
44
- 45 20. Standing G. Global labour flexibility: Seeking distributive justice: Macmillan  
46 London; 1999.  
47  
48
- 49 21. Julia M, Vanroelen C, Bosmans K, et al. Precarious Employment and Quality of  
50 Employment in Relation to Health and Well-being in Europe. *Int J Health Serv*  
51 2017;47(3):389-409.  
52  
53
- 54 22. Scott-Marshall H, Tompa E. The health consequences of precarious  
55 employment experiences. *Work* 2011;38(4):369-82.  
56  
57  
58  
59  
60



- 1  
2  
3 23. International Labour Organization. From precarious work to decent work:  
4 Outcome document to the workers' symposium on policies and regulations to  
5 combat precarious employment. ILO Geneva; 2012.
- 6  
7  
8  
9 24. Alfonsson J. Nomaderna på den svenska arbetsmarknaden. Det otrygga livets  
10 framväxt och effekter på klasstrukturen [In Swedish]. 2018.
- 11  
12  
13 25. Kretsos L, Livanos I. The extent and determinants of precarious employment in  
14 Europe. *Int J Manpow* 2016;37(1):25-43.
- 15  
16  
17 26. International Labour Organization. Non-standard employment around the  
18 world: Understanding challenges, shaping prospects. Geneva; 2016.
- 19  
20  
21 27. The Swedish Labour Policy Council (AER). Olika vägar till jobb [In Swedish].  
22 2018.
- 23  
24  
25 28. Statistics Sweden. Trends for persons in temporary employment [In Swedish].  
26 2015.
- 27  
28  
29 29. Salganik MJ, Heckathorn DD. Sampling and estimation in hidden populations  
30 using respondent-driven sampling. *Sociol methodol* 2004;34(1):193-240.
- 31  
32  
33 30. Bengtsson L, Lu X, Nguyen QC, et al. Implementation of web-based  
34 respondent-driven sampling among men who have sex with men in Vietnam. *PLoS*  
35 *One* 2012;7(11):e49417.
- 36  
37  
38  
39 31. Jonsson J, Stein ML, Johansson G, et al. A performance assessment of web-  
40 based respondent driven sampling among workers with precarious employment in  
41 Sweden. *PLoS One* 2019;14(1):e0210183.
- 42  
43  
44  
45 32. Volz E, Heckathorn DD. Probability Based Estimation Theory for Respondent  
46 Driven Sampling. *J Off Stat* 2008;24(1):79-97.
- 47  
48  
49 33. Statistics Sweden. Inkomstrappport 2016 - Hushåll och Individer [In Swedish].  
50 2018.
- 51  
52  
53 34. Lagen (1982:80) om anställningsskydd (SFS 2017:363) [Internet].
- 54  
55  
56 35. Hyresgästföreningen. Unga vuxnas boende [In Swedish]. 2018.
- 57  
58  
59  
60

## SUPPLEMENTARY MATERIAL

### Supplementary material A. EPRES-Se

#### TEMPORALITET

##### 1. Hur länge gäller ditt nuvarande kontrakt?

Om du har flera arbetsgivare anger du den arbetsgivare du arbetar för flest timmar en genomsnittlig månad.

- Tillsvidare
- 2 år eller mer
- 1 år eller mer
- 6 månader eller mer
- 3 månader eller mer
- 1 månad eller mer
- Kortare än 1 månad
- Har inget kontrakt
- Vet ej

##### 2. Hur länge har du jobbat för samma arbetsgivare/uppdragsgivare?

Om du har flera arbetsgivare anger du den arbetsgivare du arbetar för flest timmar en genomsnittlig månad.

- Mindre än 1 månad
- 1 månad till mindre än 3 månader
- 3 månader till mindre än 6 månader
- 6 månader till mindre än 1 år
- 1 år till mindre än 2 år
- 2 år till mindre än 5 år
- 5 år eller mer

#### LÖN

##### 3. Ungefär hur mycket tjänar du per månad netto (efter skatt)?

Lägg ihop summan för din vita lön efter skatt + svart lön + eventuell dricks, en genomsnittlig månad.

- 3 000 kr eller mindre
- Mellan 3 001 och 6 000 kr
- Mellan 6 001 och 9 000 kr
- Mellan 9 001 och 12 000 kr
- Mellan 12 001 och 15 000 kr
- Mellan 15 001 och 18 000 kr
- Mellan 18 001 och 21 000 kr
- Mellan 21 001 och 24 000 kr
- Mellan 24 001 och 27 000 kr
- Mellan 27 001 och 30 000 kr
- Mer än 30 000 kr
- Inget svar

##### Hur ofta tillåter din nuvarande lön dig att...

- Alltid
- Ofta

##### 4. Täcka dina dagliga grundläggande behov?

- Ibland

##### 5. Täcka oförutsedda utgifter av betydelse?

- Sällan
- Aldrig

## MAKTLÖSHET

### 6. Hur bestämdes arbetstiderna för ditt nuvarande arbete?

Välj det alternativ som stämmer bäst in på dig. Om du har flera arbetsgivare anger du den arbetsgivare du arbetar för flest timmar en genomsnittlig månad.

- De följer lag och kollektivavtalet
- De bestämdes av arbetsgivaren
- De var en överenskommelse mellan mig och min chef
- De var en överenskommelse i mitt arbetslag
- Vet ej
- Ej relevant, arbetar uppdragsbaserat

### 7. Hur bestämdes lönen för ditt nuvarande arbete?

Välj det alternativ som stämmer bäst in på dig. Om du har flera arbetsgivare anger du den arbetsgivare du arbetar för flest timmar en genomsnittlig månad.

- Den följer kollektivavtalet
- Den bestämdes av arbetsgivaren
- Den var en överenskommelse mellan mig och min chef
- Den var en överenskommelse i mitt arbetslag
- Vet ej

## SÅRBARHET

### Ange hur ofta hos din arbetsgivare som...

Om du har flera arbetsgivare anger du den arbetsgivare du arbetar för flest timmar en genomsnittlig månad.

Var god besvara alla frågor.

### 8. Du är rädd för att kräva bättre arbetsvillkor

- Alltid
- Ofta

### 9. Du är försvarslös mot orättvis behandling från överordnande

- Ibland
- Sällan

### 10. Du är rädd för att få sparken om du inte gör allt arbetsgivaren ber om

- Aldrig

### 11. Du blir behandlad auktoritärt

### 12. De får dig att känna dig lätt utbytbar

## RÄTTIGHETER

### Har du rätt till något av följande?

Var god besvara alla frågor.

13. Föräldraledighet

- Ja

- Nej

14. Ålderspension

- Vet ej

15. A-kassa

16. Avgångsvederlag vid uppsägning

17. Sjukersättning/sjukpenning

## UTÖVANDE AV RÄTTIGHETER

### Hur ofta i den organisation där du arbetar kan du utöva följande rättigheter?

Om du har flera arbetsgivare anger du den arbetsgivare du arbetar för flest timmar en genomsnittlig månad.

Var god besvara alla frågor.

18. Ta helg/veckovila utan problem

- Alltid

- Ofta

19. Ta semesterdagar utan problem

- Ibland

- Sällan

20. Ta en ledig dag av familjescäl utan problem (vård av sjukt barn, vård av sjuk anhörig etc.)

- Aldrig

21. Ta en ledig dag av personliga skäl utan problem

22. Sjukskriva dig utan problem

23. Gå till läkare när du behöver

## Supplementary material B. English translation of EPRES-Se with coding

### TEMPORARINESS

Coding

|                                                                                                                       |                          |   |
|-----------------------------------------------------------------------------------------------------------------------|--------------------------|---|
| <b>1. How long is your current employment contract valid?</b>                                                         | - Indefinitely           | 0 |
|                                                                                                                       | - 2 years or more        | 1 |
| If you have more than one employer, please indicate the employer you work the most hours for during an average month. | - 1 year or more         | 1 |
|                                                                                                                       | - 6 months or more       | 2 |
|                                                                                                                       | - 3 months or more       | 3 |
|                                                                                                                       | - 1 month or more        | 3 |
|                                                                                                                       | - Less than 1 month      | 3 |
|                                                                                                                       | - Do not have a contract | 4 |
|                                                                                                                       | - Do not know            | 4 |

|                                                                                                                       |                                  |   |
|-----------------------------------------------------------------------------------------------------------------------|----------------------------------|---|
| <b>2. How long have you been working for the same employer?</b>                                                       | - Less than 1 month              | 4 |
|                                                                                                                       | - 1 month to less than 3 months  | 3 |
| If you have more than one employer, please indicate the employer you work the most hours for during an average month. | - 3 months to less than 6 months | 3 |
|                                                                                                                       | - 6 months to less than 1 year   | 2 |
|                                                                                                                       | - 1 year to less than 2 years    | 2 |
|                                                                                                                       | - 2 years to less than 5 years   | 1 |
|                                                                                                                       | - 5 years or more                | 0 |

### WAGES

|                                                                                                                    |                                 |   |
|--------------------------------------------------------------------------------------------------------------------|---------------------------------|---|
| <b>3. Approximately how much do you earn per month after taxes?</b>                                                | - 3000 SEK or less              | 4 |
|                                                                                                                    | - Between 3001 and 6000 SEK     | 4 |
| Add the amount for your salary after tax deductions + salary for illicit work + any tips, during an average month. | - Between 6001 and 9000 SEK     | 3 |
|                                                                                                                    | - Between 9001 and 12 000 SEK   | 3 |
|                                                                                                                    | - Between 12 001 and 15 000 SEK | 2 |
|                                                                                                                    | - Between 15 001 and 18 000 SEK | 2 |
|                                                                                                                    | - Between 18 001 and 21 000 SEK | 1 |
|                                                                                                                    | - Between 21 001 and 24 000 SEK | 1 |
|                                                                                                                    | - Between 24 001 and 27 000 SEK | 0 |
|                                                                                                                    | - Between 27 001 and 30 000 SEK | 0 |
|                                                                                                                    | - More than 30 000 SEK          | 0 |
|                                                                                                                    | - No answer                     | - |

|                                                           |             |   |
|-----------------------------------------------------------|-------------|---|
| <b>How often does your current salary allow you to...</b> | - Always    | 0 |
|                                                           | - Often     | 1 |
| <b>4. Cover you daily basic needs?</b>                    | - Sometimes | 2 |
| <b>5. Cover unforeseen expenses of significance?</b>      | - Rarely    | 3 |
|                                                           | - Never     | 4 |

## DISEMPOWERMENT

### 6. How were your working hours settled for your current job?

Indicate the alternative that fits you best. If you have more than one employer, please indicate the employer you work the most hours for during an average month.

- |                                                                                    |   |
|------------------------------------------------------------------------------------|---|
| - My working hours are in accordance with Swedish law and the collective agreement | 0 |
| - My employer decided my working hours                                             | 3 |
| - My working hours are the result of an agreement between me and my manager        | 2 |
| - My working hours are the result of an agreement within my work team              | 1 |
| - Do not know                                                                      | 4 |
| - Not applicable. I work project-based                                             | 2 |

### 7. How was the salary settled for your current job?

Indicate the alternative that fits you best. If you have more than one employer, please indicate the employer you work the most hours for during an average month.

- |                                                                     |   |
|---------------------------------------------------------------------|---|
| - My salary is accordance with the collective agreement             | 0 |
| - My salary was set by my employer                                  | 3 |
| - My salary is the result of an agreement between me and my manager | 2 |
| - My salary is the result of an agreement in my work team           | 1 |
| - Do not know                                                       | 4 |

## VULNERABILITY

### Indicate how often, at your employer...

If you have more than one employer, please indicate the employer you work the most hours for during an average month.

Please indicate an answer to all of the questions.

### 8. You feel afraid to demand better working conditions

- |             |   |
|-------------|---|
| - Always    | 4 |
| - Often     | 3 |
| - Sometimes | 2 |

### 9. You are defenceless towards unfair treatment by your superiors

- |          |   |
|----------|---|
| - Rarely | 1 |
| - Never  | 0 |

### 10. You feel afraid of being fired if you do not comply with everything your employer asks of you

### 11. You are treated in an authoritarian manner

1  
2  
3 **12. You are made to feel easily replaceable**  
4  
5

6 **RIGHTS**  
7

8  
9 **Do you have the right to any of the following?**

10 Please indicate an answer to all of the questions.  
11

|    |                                                      |               |   |
|----|------------------------------------------------------|---------------|---|
| 12 |                                                      |               |   |
| 13 | <b>13. Parental leave</b>                            | - Yes         | 0 |
| 14 |                                                      | - No          | 1 |
| 15 | <b>14. Retirement due to old age</b>                 | - Do not know | 2 |
| 16 |                                                      |               |   |
| 17 | <b>15. Unemployment insurance fund (A-kassa)</b>     |               |   |
| 18 |                                                      |               |   |
| 19 | <b>16. Severance pay in the event of termination</b> |               |   |
| 20 |                                                      |               |   |
| 21 | <b>17. Sickness benefit</b>                          |               |   |
| 22 |                                                      |               |   |
| 23 |                                                      |               |   |

24 **EXERCISE OF RIGHTS**  
25

26  
27  
28 **How often, in the organisation where you work, are**  
29 **you able to exercise the following rights?**

30 If you have more than one employer, please indicate the  
31 employer you work the most hours for during an average  
32 month.  
33

34 Please indicate an answer to all of the questions.  
35

|    |                                                               |             |   |
|----|---------------------------------------------------------------|-------------|---|
| 36 | <b>18. Take the weekend off/ weekly rest without</b>          | - Always    | 0 |
| 37 | <b>problem</b>                                                | - Often     | 1 |
| 38 | <b>19. Take vacation days without problem</b>                 | - Sometimes | 2 |
| 39 |                                                               | - Rarely    | 3 |
| 40 | <b>20. Take a day off for family reasons without</b>          | - Never     | 4 |
| 41 | <b>problem (care of a sick child, care of a sick relative</b> |             |   |
| 42 | <b>etc.)</b>                                                  |             |   |
| 43 |                                                               |             |   |
| 44 | <b>21. Take a day off for personal reasons without</b>        |             |   |
| 45 | <b>problem</b>                                                |             |   |
| 46 |                                                               |             |   |
| 47 | <b>22. Go on sick leave without problem</b>                   |             |   |
| 48 |                                                               |             |   |
| 49 | <b>23. Go to the doctor when needed</b>                       |             |   |
| 50 |                                                               |             |   |
| 51 |                                                               |             |   |

**Supplementary material C. Comparison of subscale means for recoding of participants with an indefinite contract and on demand/by the hour employment**

**Crosstabulation of type of employment and contractual length**

Table showing crosstabulation of type of employment and contractual length (EPRES-Se item 1)

| Contractual length              | Type of employment   |                                |                                                | Total |
|---------------------------------|----------------------|--------------------------------|------------------------------------------------|-------|
|                                 | Temporary employment | Employed on demand/by the hour | Self-employed (involuntary), intern, part-time |       |
| <b>Indefinitely</b>             | 16 <sup>a</sup>      | 139 <sup>b</sup>               | 20 <sup>a</sup>                                | 175   |
| <b>2 years or more</b>          | 3                    | 3                              | 1                                              | 7     |
| <b>1 year or more</b>           | 9                    | 7                              | 1                                              | 17    |
| <b>6 months or more</b>         | 34                   | 32                             | 9                                              | 75    |
| <b>3 months or more</b>         | 24                   | 19                             | 6                                              | 49    |
| <b>1 month or more</b>          | 16                   | 6                              | 2                                              | 24    |
| <b>Less than 1 month</b>        | 11                   | 5                              | 0                                              | 16    |
| <b>I do not have a contract</b> | 2                    | 21                             | 12                                             | 35    |
| <b>Do not know</b>              | 6                    | 11                             | 0                                              | 17    |
| <b>Total</b>                    | 121                  | 243                            | 51                                             | 415   |

<sup>a</sup> Used in comparison 2

<sup>b</sup> Used in comparison 1



## 1. Comparison of subscale means for employees with an indefinite contractual length and on demand/by the hour employment

Table showing subscale averages for employees with an indefinite contractual length and an on demand/by the hour employment

| Subscale           | N   | Minimum | Maximum | Mean | Std. Deviation |
|--------------------|-----|---------|---------|------|----------------|
| Wages              | 135 | 0.00    | 3.67    | 1.76 | 0.72           |
| Disempowerment     | 139 | 0.00    | 4.00    | 2.22 | 0.97           |
| Vulnerability      | 137 | 0.00    | 4.00    | 1.35 | 0.94           |
| Rights             | 136 | 0.00    | 4.00    | 2.35 | 1.06           |
| Exercise of rights | 136 | 0.00    | 3.50    | 1.74 | 0.71           |
| Valid N            | 134 |         |         |      |                |

Table showing least sum of squares-differences between subscale averages for employees with an on demand/by the hour employment, comparing employees with an indefinite contractual length vs. employees with any other contractual length

| EPRES-Se item 1. How long is your current employment valid? |       |       |       |       |       |              |             |              |
|-------------------------------------------------------------|-------|-------|-------|-------|-------|--------------|-------------|--------------|
| Subscales                                                   | 2 y   | 1y    | 6m    | 3m    | 1m    | <1m          | No contract | I don't know |
| Wages                                                       | 0.014 | 0.652 | 0.320 | 0,100 | 0.348 | 0.096        | 0.142       | 0.025        |
| Disempowerment                                              | 0.386 | 0.291 | 0.063 | 0,360 | 0.303 | 0.119        | 0.053       | 0.189        |
| Vulnerability                                               | 1.216 | 0.092 | 0.320 | 0,004 | 0.518 | 0.251        | 0.461       | 0.658        |
| Rights                                                      | 2.086 | 0.467 | 0.053 | 0,659 | 0.180 | 0.113        | 0.123       | 0.338        |
| Exercise of rights                                          | 0.185 | 0.764 | 0.135 | 0,191 | 0.315 | 0.040        | 0.046       | 0.558        |
| Sum                                                         | 3.887 | 2.266 | 0.891 | 1.313 | 1.664 | <b>0.620</b> | 0.824       | 1.769        |

## 2. Comparison of subscale means for employees with an indefinite contractual length and any other type of employment (excluding on demand/by the hour)

Table showing subscale averages for employees with an indefinite contract length and any other type of employment

| Subscales          | N  | Minimum | Maximum | Mean  | Std. Deviation |
|--------------------|----|---------|---------|-------|----------------|
| Wages              | 35 | 0.33    | 4.00    | 1.819 | 0.919          |
| Disempowerment     | 36 | 0.00    | 4.00    | 2.194 | 1.104          |
| Vulnerability      | 36 | 0.00    | 4.00    | 1.167 | 0.966          |
| Rights             | 36 | 0.00    | 4.00    | 2.356 | 1.182          |
| Exercise of rights | 36 | 0.00    | 4.00    | 1.690 | 0.876          |
| Valid N            | 35 |         |         |       |                |

Table showing least sum of squares-differences between subscale averages for employees with any other employment (excluding on demand/by the hour employees), comparing employees with an indefinite contractual length vs. employees with any other contractual length

| EPRES-Se item 1. How long is your current employment valid? |       |       |       |       |       |       |             |              |
|-------------------------------------------------------------|-------|-------|-------|-------|-------|-------|-------------|--------------|
| Subscales                                                   | 2 y   | 1y    | 6m    | 3m    | 1m    | <1m   | No contract | I don't know |
| Wages                                                       | 1.402 | 0.486 | 0.510 | 0.624 | 0.504 | 0.819 | 0.264       | 0.459        |
| Disempowerment                                              | 0.569 | 0.244 | 0.218 | 0.094 | 0.083 | 0.058 | 0.377       | 0.028        |
| Vulnerability                                               | 0.533 | 0.233 | 0.517 | 0.667 | 0.500 | 0.258 | 0.276       | 0.633        |
| Rights                                                      | 1.456 | 0.836 | 0.132 | 0.276 | 0.378 | 0.792 | 0.298       | 0.422        |
| Exercise of rights                                          | 0.357 | 0.957 | 0.252 | 0.179 | 0.227 | 0.311 | 0.404       | 0.032        |
| Sum                                                         | 4.317 | 2.756 | 1.629 | 1.839 | 1.692 | 2.238 | 1.619       | 1.575        |

**Supplementary material D. Weighted results, table 1-4****Table 1. Weighted demographic characteristics of the study population (percentages), N=415**

|                   |                                  | %   |
|-------------------|----------------------------------|-----|
| <b>Age</b>        | 18-24                            | 34% |
|                   | 25-29                            | 43% |
|                   | 30-64                            | 23% |
| <b>Sex</b>        | Male                             | 50% |
|                   | Female                           | 50% |
| <b>Employment</b> | Temporary employment             | 21% |
|                   | Employed on demand/by the hour   | 64% |
|                   | Self-employed (involuntary)      | 3%  |
|                   | Intern                           | 1%  |
|                   | Part-time employed (involuntary) | 10% |

**Table 2. Weighted item descriptive statistics and Pearson item-subscale correlations of EPRES-Se**

| Item                              | Missing % <sup>1</sup> | Mean | SD <sup>2</sup> | Response frequency <sup>3</sup> |      |      |      |      | Pearson item subscale correlations <sup>4</sup> |             |             |             |             |             |
|-----------------------------------|------------------------|------|-----------------|---------------------------------|------|------|------|------|-------------------------------------------------|-------------|-------------|-------------|-------------|-------------|
|                                   |                        |      |                 | 0                               | 1    | 2    | 3    | 4    | T                                               | W           | D           | V           | R           | ER          |
| <b>Temporariness</b>              |                        |      |                 |                                 |      |      |      |      |                                                 |             |             |             |             |             |
| Length of contract <sup>5</sup>   | 0.0                    | 2.5  | 1.1             | 9.5                             | 5.8  | 17.9 | 56.0 | 10.9 | <b>-0.05</b>                                    | 0.03        | -0.02       | 0.06        | 0.06        | 0.05        |
| Time working empl. <sup>5</sup>   | 0.0                    | 2.1  | 0.9             | 2.8                             | 22.1 | 43.8 | 27.8 | 3.5  | <b>-0.05</b>                                    | 0.15        | 0.16        | 0.05        | 0.36        | 0.21        |
| <b>Wages</b>                      |                        |      |                 |                                 |      |      |      |      |                                                 |             |             |             |             |             |
| Income monthly                    | 3.5                    | 2.6  | 1.1             | 6.9                             | 6.6  | 23.3 | 47.0 | 16.1 | 0.13                                            | <b>0.40</b> | 0.05        | -0.00       | 0.28        | 0.24        |
| Cover basic need                  | 1.3                    | 0.8  | 0.9             | 40.2                            | 44.2 | 11.4 | 2.5  | 1.7  | 0.01                                            | <b>0.62</b> | 0.05        | 0.27        | 0.13        | 0.28        |
| Cover unforeseen expen.           | 1.3                    | 1.8  | 1.1             | 13.3                            | 28.7 | 34.3 | 15.6 | 8.1  | 0.13                                            | <b>0.57</b> | 0.08        | 0.43        | 0.17        | 0.22        |
| <b>Disempowerment</b>             |                        |      |                 |                                 |      |      |      |      |                                                 |             |             |             |             |             |
| Working hour settled <sup>5</sup> | 0.0                    | 2.2  | 1.2             | 18.7                            | 0.7  | 26.3 | 47.8 | 6.5  | 0.08                                            | 0.14        | <b>0.33</b> | 0.08        | 0.19        | 0.15        |
| Salary settled <sup>5</sup>       | 0.0                    | 2.2  | 1.2             | 19.3                            | 2.1  | 19.3 | 54.1 | 5.2  | 0.07                                            | -0.03       | <b>0.33</b> | 0.00        | 0.10        | 0.12        |
| <b>Vulnerability</b>              |                        |      |                 |                                 |      |      |      |      |                                                 |             |             |             |             |             |
| Demand work cond.                 | 1.3                    | 1.5  | 1.1             | 21.8                            | 33.0 | 28.4 | 11.4 | 5.4  | 0.04                                            | 0.20        | 0.09        | <b>0.76</b> | 0.09        | 0.26        |
| Unfair treatment                  | 1.3                    | 1.2  | 1.1             | 28.5                            | 39.2 | 18.4 | 9.9  | 4.0  | 0.04                                            | 0.20        | 0.08        | <b>0.80</b> | 0.11        | 0.26        |
| Afraid fired                      | 1.3                    | 1.4  | 1.2             | 28.4                            | 30.9 | 21.4 | 13.3 | 6.0  | 0.09                                            | 0.31        | 0.10        | <b>0.79</b> | 0.17        | 0.38        |
| Treated authoritarian             | 1.3                    | 1.2  | 1.1             | 28.4                            | 38.1 | 19.1 | 9.9  | 4.5  | 0.03                                            | 0.22        | -0.04       | <b>0.64</b> | 0.12        | 0.23        |
| Easily replaced                   | 1.3                    | 1.6  | 1.3             | 21.6                            | 33.2 | 22.7 | 11.5 | 11.1 | 0.13                                            | 0.30        | -0.02       | <b>0.74</b> | 0.15        | 0.24        |
| <b>Rights</b>                     |                        |      |                 |                                 |      |      |      |      |                                                 |             |             |             |             |             |
| Right parental leave              | 1.3                    | 1.2  | 0.8             | 23.0                            | 33.7 | 43.3 |      |      | 0.19                                            | 0.20        | 0.22        | 0.12        | <b>0.59</b> | 0.22        |
| Right retirement                  | 1.3                    | 1.2  | 0.8             | 24.4                            | 29.8 | 45.8 |      |      | 0.29                                            | 0.20        | 0.23        | 0.17        | <b>0.59</b> | 0.28        |
| Right unemployment                | 1.3                    | 1.0  | 0.9             | 36.7                            | 24.7 | 38.6 |      |      | 0.13                                            | 0.17        | 0.05        | 0.07        | <b>0.61</b> | 0.12        |
| Right severance pay               | 1.3                    | 1.4  | 0.6             | 6.0                             | 53.2 | 40.8 |      |      | 0.14                                            | <b>0.11</b> | 0.04        | 0.05        | <b>0.50</b> | 0.05        |
| Right sickness benefits           | 1.3                    | 1.0  | 0.9             | 38.7                            | 26.8 | 34.5 |      |      | 0.28                                            | 0.15        | 0.10        | 0.13        | <b>0.53</b> | 0.15        |
| <b>Exercise of rights</b>         |                        |      |                 |                                 |      |      |      |      |                                                 |             |             |             |             |             |
| Take weekend off                  | 1.3                    | 1.7  | 1.1             | 19.9                            | 17.4 | 44.6 | 11.5 | 6.5  | 0.07                                            | 0.23        | 0.14        | 0.21        | 0.13        | <b>0.67</b> |
| Take vacation                     | 1.3                    | 1.9  | 1.0             | 12.3                            | 20.1 | 43.4 | 18.3 | 6.0  | 0.15                                            | 0.25        | 0.18        | 0.27        | 0.19        | <b>0.71</b> |
| Take day off                      | 1.3                    | 1.7  | 1.1             | 21.4                            | 17.8 | 41.4 | 13.6 | 5.8  | 0.18                                            | 0.22        | 0.19        | 0.25        | 0.20        | <b>0.77</b> |
| Take day off, pers.               | 1.3                    | 1.9  | 1.1             | 13.7                            | 19.1 | 41.8 | 16.4 | 9.0  | 0.12                                            | 0.23        | 0.05        | 0.37        | 0.19        | <b>0.71</b> |
| Sick leave                        | 1.3                    | 1.6  | 1.1             | 21.7                            | 19.1 | 42.9 | 12.1 | 4.1  | 0.11                                            | 0.22        | 0.15        | 0.23        | 0.19        | <b>0.71</b> |
| Go to doctor                      | 1.3                    | 1.2  | 1.1             | 34.3                            | 27.1 | 28.2 | 7.2  | 3.2  | 0.19                                            | 0.28        | 0.07        | 0.24        | 0.19        | <b>0.68</b> |

<sup>1</sup> Proportion of participants with any missing item; <sup>2</sup> SD=Standard Deviation; <sup>3</sup> Frequency (%) of participants indicating the specific response. 0 indicates the lowest precariousness score, 4 indicating the highest precariousness score. <sup>4</sup> Corrected for overlap, i.e., item is removed from the corresponding subscale. T=Temporariness; W=Wages; D=Disempowerment; V=Vulnerability; R=Rights; ER=Exercise rights. <sup>5</sup> Inter-item correlations

**Table 3. Weighted scale descriptive statistics: range, mean, standard deviation (SD), floor and ceiling effects and Cronbach's alpha coefficient**

| Subscale           | Items | Mean | SD  | Missing (%) <sup>1</sup> | Obs. range | Floor % <sup>2</sup> | Ceiling % <sup>2</sup> | Cronbach's alpha |
|--------------------|-------|------|-----|--------------------------|------------|----------------------|------------------------|------------------|
| Temporariness      | 2     | 2.3  | 0.7 | 0.0                      | 0-4        | 0.3                  | 1.3                    | -0.10            |
| Wages              | 3     | 1.7  | 0.8 | 4.7                      | 0-4        | 2.9                  | 0.9                    | 0.70             |
| Disempowerment     | 2     | 2.2  | 1.0 | 0.0                      | 0-4        | 8.7                  | 2.4                    | 0.49             |
| Vulnerability      | 5     | 1.4  | 1.0 | 1.2                      | 0-4        | 14.1                 | 2.0                    | 0.90             |
| Rights             | 5     | 2.3  | 1.2 | 1.3                      | 0-4        | 3.8                  | 17.7                   | 0.78             |
| Exercise of rights | 6     | 1.6  | 0.9 | 1.3                      | 0-4        | 7.2                  | 1.0                    | 0.89             |
| EPRES-se           | 23    | 1.9  | 0.5 | 4.8                      | 0.09-3.07  | 0.2                  | 0.6                    | 0.84             |

<sup>1</sup> Proportion of participants with any missing item

<sup>2</sup> Proportion of participants with lowest (floor) and highest (ceiling) EPRES-Se scores

**Table 4. Weighted factor loadings from exploratory factor analysis of the EPRES-Se**

|                         | Factor          |               |             |             |                |               |
|-------------------------|-----------------|---------------|-------------|-------------|----------------|---------------|
|                         | Exercise rights | Vulnerability | Rights      | Wages       | Disempowerment | Temporariness |
| <b>Temporariness</b>    |                 |               |             |             |                |               |
| Length of contract      |                 |               |             |             |                | <b>-0.21</b>  |
| Time working empl.      | 0.17            |               | 0.37        |             | 0.14           | <b>-0.39</b>  |
| <b>Wages</b>            |                 |               |             |             |                |               |
| Income monthly          | 0.20            | -0.11         | 0.25        | <b>0.49</b> |                | -0.24         |
| Cover basic need        | 0.20            | 0.19          |             | <b>0.66</b> |                |               |
| Cover unforeseen expen. |                 | 0.35          |             | <b>0.84</b> |                | 0.18          |
| <b>Disempowerment</b>   |                 |               |             |             |                |               |
| Working hour settled    |                 |               | 0.13        |             | <b>0.43</b>    |               |
| Salary settled          |                 |               |             |             | <b>0.69</b>    | 0.16          |
| <b>Vulnerability</b>    |                 |               |             |             |                |               |
| Demand work cond.       | 0.11            | <b>0.81</b>   |             |             |                |               |
| Unfair treatment        |                 | <b>0.86</b>   |             |             |                |               |
| Afraid fired            | 0.24            | <b>0.78</b>   |             | 0.12        | 0.13           | -0.11         |
| Treated authoritarian   | 0.11            | <b>0.68</b>   |             |             | -0.14          |               |
| Easily replaced         |                 | <b>0.76</b>   |             | 0.17        |                |               |
| <b>Rights</b>           |                 |               |             |             |                |               |
| Right parental leave    | 0.15            |               | <b>0.69</b> |             | 0.20           |               |
| Right retirement        | 0.17            |               | <b>0.68</b> |             | 0.24           | -0.12         |
| Right unemployment      |                 |               | <b>0.70</b> |             |                | -0.17         |
| Right severance pay     |                 |               | <b>0.56</b> |             |                |               |
| Right sickness benefits |                 |               | <b>0.60</b> |             |                | 0.14          |
| <b>Exercise rights</b>  |                 |               |             |             |                |               |
| Take weekend off        | <b>0.69</b>     |               |             | 0.11        |                | -0.11         |
| Take vacation           | <b>0.74</b>     | 0.12          |             |             | 0.10           |               |
| Take day off            | <b>0.82</b>     | 0.11          |             |             |                | 0.14          |
| Take day off, pers.     | <b>0.73</b>     | 0.26          |             |             | -0.10          | 0.10          |
| Sick leave              | <b>0.74</b>     |               |             |             | 0.15           | -0.15         |
| Go to doctor            | <b>0.69</b>     |               | 0.11        | 0.15        |                |               |

Table showing factor loadings &gt;0.1

The weighted exploratory factor analysis extracted six factor with eigenvalues >1 (eigenvalues: 5.6; 3.0; 2.5; 1.5; 1.4; 1.1). These factors were the same as in EPRES-2010, thereby confirming the EPRES-2010 scale structure. Together, the six factor explained 65.4% of the variance.

1  
2  
3  
4  
5  
6  
7  
8  
9  
10  
11  
12  
13  
14  
15  
16  
17  
18  
19  
20  
21  
22  
23  
24  
25  
26  
27  
28  
29  
30  
31  
32  
33  
34  
35  
36  
37  
38  
39  
40  
41  
42  
43  
44  
45  
46  
47  
48  
49  
50  
51  
52  
53  
54  
55  
56  
57  
58  
59  
60

For peer review only

STROBE Statement—Checklist of items that should be included in reports of *cross-sectional studies*

|                              | Item No | Recommendation                                                                                                                                                                                                                                                                                                                                                                                                |
|------------------------------|---------|---------------------------------------------------------------------------------------------------------------------------------------------------------------------------------------------------------------------------------------------------------------------------------------------------------------------------------------------------------------------------------------------------------------|
| <b>Title and abstract</b>    | 1       | (a) Indicate the study's design with a commonly used term in the title or the abstract<br>(b) Provide in the abstract an informative and balanced summary of what was done and what was found                                                                                                                                                                                                                 |
| <b>Introduction</b>          |         |                                                                                                                                                                                                                                                                                                                                                                                                               |
| Background/rationale         | 2       | Explain the scientific background and rationale for the investigation being reported                                                                                                                                                                                                                                                                                                                          |
| Objectives                   | 3       | State specific objectives, including any prespecified hypotheses                                                                                                                                                                                                                                                                                                                                              |
| <b>Methods</b>               |         |                                                                                                                                                                                                                                                                                                                                                                                                               |
| Study design                 | 4       | Present key elements of study design early in the paper                                                                                                                                                                                                                                                                                                                                                       |
| Setting                      | 5       | Describe the setting, locations, and relevant dates, including periods of recruitment, exposure, follow-up, and data collection                                                                                                                                                                                                                                                                               |
| Participants                 | 6       | (a) Give the eligibility criteria, and the sources and methods of selection of participants                                                                                                                                                                                                                                                                                                                   |
| Variables                    | 7       | Clearly define all outcomes, exposures, predictors, potential confounders, and effect modifiers. Give diagnostic criteria, if applicable                                                                                                                                                                                                                                                                      |
| Data sources/<br>measurement | 8*      | For each variable of interest, give sources of data and details of methods of assessment (measurement). Describe comparability of assessment methods if there is more than one group                                                                                                                                                                                                                          |
| Bias                         | 9       | Describe any efforts to address potential sources of bias                                                                                                                                                                                                                                                                                                                                                     |
| Study size                   | 10      | Explain how the study size was arrived at                                                                                                                                                                                                                                                                                                                                                                     |
| Quantitative variables       | 11      | Explain how quantitative variables were handled in the analyses. If applicable, describe which groupings were chosen and why                                                                                                                                                                                                                                                                                  |
| Statistical methods          | 12      | (a) Describe all statistical methods, including those used to control for confounding<br>(b) Describe any methods used to examine subgroups and interactions<br>(c) Explain how missing data were addressed<br>(d) If applicable, describe analytical methods taking account of sampling strategy<br>(e) Describe any sensitivity analyses                                                                    |
| <b>Results</b>               |         |                                                                                                                                                                                                                                                                                                                                                                                                               |
| Participants                 | 13*     | (a) Report numbers of individuals at each stage of study—eg numbers potentially eligible, examined for eligibility, confirmed eligible, included in the study, completing follow-up, and analysed<br>(b) Give reasons for non-participation at each stage<br>(c) Consider use of a flow diagram                                                                                                               |
| Descriptive data             | 14*     | (a) Give characteristics of study participants (eg demographic, clinical, social) and information on exposures and potential confounders<br>(b) Indicate number of participants with missing data for each variable of interest                                                                                                                                                                               |
| Outcome data                 | 15*     | Report numbers of outcome events or summary measures                                                                                                                                                                                                                                                                                                                                                          |
| Main results                 | 16      | (a) Give unadjusted estimates and, if applicable, confounder-adjusted estimates and their precision (eg, 95% confidence interval). Make clear which confounders were adjusted for and why they were included<br>(b) Report category boundaries when continuous variables were categorized<br>(c) If relevant, consider translating estimates of relative risk into absolute risk for a meaningful time period |
| Other analyses               | 17      | Report other analyses done—eg analyses of subgroups and interactions, and sensitivity analyses                                                                                                                                                                                                                                                                                                                |



1  
2  
3  
4  
5  
6  
7  
8  
9  
10  
11  
12  
13  
14  
15  
16  
17  
18  
19  
20  
21  
22  
23  
24  
25  
26  
27  
28  
29  
30  
31  
32  
33  
34  
35  
36  
37  
38  
39  
40  
41  
42  
43  
44  
45  
46  
47  
48  
49  
50  
51  
52  
53  
54  
55  
56  
57  
58  
59  
60

| <b>Discussion</b>        |    |                                                                                                                                                                            |
|--------------------------|----|----------------------------------------------------------------------------------------------------------------------------------------------------------------------------|
| Key results              | 18 | Summarise key results with reference to study objectives                                                                                                                   |
| Limitations              | 19 | Discuss limitations of the study, taking into account sources of potential bias or imprecision. Discuss both direction and magnitude of any potential bias                 |
| Interpretation           | 20 | Give a cautious overall interpretation of results considering objectives, limitations, multiplicity of analyses, results from similar studies, and other relevant evidence |
| Generalisability         | 21 | Discuss the generalisability (external validity) of the study results                                                                                                      |
| <b>Other information</b> |    |                                                                                                                                                                            |
| Funding                  | 22 | Give the source of funding and the role of the funders for the present study and, if applicable, for the original study on which the present article is based              |

\*Give information separately for exposed and unexposed groups.

**Note:** An Explanation and Elaboration article discusses each checklist item and gives methodological background and published examples of transparent reporting. The STROBE checklist is best used in conjunction with this article (freely available on the Web sites of PLoS Medicine at <http://www.plosmedicine.org/>, Annals of Internal Medicine at <http://www.annals.org/>, and Epidemiology at <http://www.epidem.com/>). Information on the STROBE Initiative is available at [www.strobe-statement.org](http://www.strobe-statement.org).

# BMJ Open

## Measuring precarious employment in Sweden: Translation, adaptation and psychometric properties of the Employment Precariousness Scale (EPRES)

|                                 |                                                                                                                                                                                                                                                                                                                                                                                                                                                                                                                                                                                                                                                                                                                                                                                                                                                                                                                                                                                                                                                                                                                                                                                                                                                                                                                                                                                                                                |
|---------------------------------|--------------------------------------------------------------------------------------------------------------------------------------------------------------------------------------------------------------------------------------------------------------------------------------------------------------------------------------------------------------------------------------------------------------------------------------------------------------------------------------------------------------------------------------------------------------------------------------------------------------------------------------------------------------------------------------------------------------------------------------------------------------------------------------------------------------------------------------------------------------------------------------------------------------------------------------------------------------------------------------------------------------------------------------------------------------------------------------------------------------------------------------------------------------------------------------------------------------------------------------------------------------------------------------------------------------------------------------------------------------------------------------------------------------------------------|
| Journal:                        | <i>BMJ Open</i>                                                                                                                                                                                                                                                                                                                                                                                                                                                                                                                                                                                                                                                                                                                                                                                                                                                                                                                                                                                                                                                                                                                                                                                                                                                                                                                                                                                                                |
| Manuscript ID                   | bmjopen-2019-029577.R1                                                                                                                                                                                                                                                                                                                                                                                                                                                                                                                                                                                                                                                                                                                                                                                                                                                                                                                                                                                                                                                                                                                                                                                                                                                                                                                                                                                                         |
| Article Type:                   | Research                                                                                                                                                                                                                                                                                                                                                                                                                                                                                                                                                                                                                                                                                                                                                                                                                                                                                                                                                                                                                                                                                                                                                                                                                                                                                                                                                                                                                       |
| Date Submitted by the Author:   | 25-Jun-2019                                                                                                                                                                                                                                                                                                                                                                                                                                                                                                                                                                                                                                                                                                                                                                                                                                                                                                                                                                                                                                                                                                                                                                                                                                                                                                                                                                                                                    |
| Complete List of Authors:       | <p>Jonsson, Johanna; Karolinska Institutet, Institute of Environmental Medicine, Unit of Occupational Medicine</p> <p>Vives, Alejandra; Pontificia Universidad Catolica de Chile Escuela de Medicina, Department of Public Health; Universitat Pompeu Fabra, Department of Political and Social Sciences, Health Inequalities Research Group, Employment Conditions Knowledge Network (GREDS-EMCONET)</p> <p>Benach, Joan; Universitat Pompeu Fabra, Department of Political and Social Sciences, Health Inequalities Research Group, Employment Conditions Knowledge Network (GREDS-EMCONET); Universidad Autonoma de Madrid, Transdisciplinary Research Group on Socioecological Transitions (GinTRANS2)</p> <p>Kjellberg, Katarina; Karolinska Institutet, Institute of Environmental Medicine, Unit of Occupational Medicine; Stockholm County Council, Center for Occupational and Environmental Medicine</p> <p>Selander, Jenny; Karolinska Institutet, Institute of Environmental Medicine, Unit of Occupational Medicine</p> <p>Johansson, Gun; Karolinska Institute, Institute of Environmental Medicine, Unit of Occupational Medicine; Stockholm County Council, Center for Occupational and Environmental Medicine</p> <p>Bodin, Theo; Karolinska Institutet, Unit of Occupational Medicine, Institute of Environmental Medicine; Stockholm County Council, Center for Occupational and Environmental Medicine</p> |
| <b>Primary Subject Heading</b>: | Occupational and environmental medicine                                                                                                                                                                                                                                                                                                                                                                                                                                                                                                                                                                                                                                                                                                                                                                                                                                                                                                                                                                                                                                                                                                                                                                                                                                                                                                                                                                                        |
| Secondary Subject Heading:      | Epidemiology, Public health                                                                                                                                                                                                                                                                                                                                                                                                                                                                                                                                                                                                                                                                                                                                                                                                                                                                                                                                                                                                                                                                                                                                                                                                                                                                                                                                                                                                    |
| Keywords:                       | EPIDEMIOLOGY, OCCUPATIONAL & INDUSTRIAL MEDICINE, PUBLIC HEALTH, STATISTICS & RESEARCH METHODS                                                                                                                                                                                                                                                                                                                                                                                                                                                                                                                                                                                                                                                                                                                                                                                                                                                                                                                                                                                                                                                                                                                                                                                                                                                                                                                                 |
|                                 |                                                                                                                                                                                                                                                                                                                                                                                                                                                                                                                                                                                                                                                                                                                                                                                                                                                                                                                                                                                                                                                                                                                                                                                                                                                                                                                                                                                                                                |

SCHOLARONE™  
Manuscripts

1  
2  
3 **Measuring precarious employment in Sweden: Translation,**  
4 **adaptation and psychometric properties of the Employment**  
5 **Precariousness Scale (EPRES)**  
6  
7  
8  
9

10  
11  
12 Johanna Jonsson\* (MSc)<sup>1</sup>, Alejandra Vives (MD, PhD)<sup>2,3</sup>, Joan Benach (MD, PhD)<sup>3,4</sup>,  
13 Katarina Kjellberg (PhD)<sup>1,5</sup>, Jenny Selander (PhD)<sup>1</sup>, Gun Johansson (PhD)<sup>1,5</sup> & Theo  
14 Bodin (MD, PhD)<sup>1,5</sup>  
15  
16  
17  
18  
19

20 1 Institute of Environmental Medicine, Unit of Occupational Medicine, Karolinska Institutet, Stockholm,  
21 Sweden  
22

23 2 Department of Public Health, School of Medicine, Pontificia Universidad Católica de Chile  
24

25 3 Health Inequalities Research Group, Employment Conditions Knowledge Network (GREDS-  
26 EMCONET), Department of Political and Social Sciences, Universitat Pompeu Fabra, Barcelona, Spain  
27

28 4 Transdisciplinary Research Group on Socioecological Transitions (GinTRANS2). Universidad  
29 Autónoma Madrid, 28049 Madrid, Spain  
30

31 5 Centre for Occupational and Environmental Medicine, Stockholm County Council, Stockholm,  
32 Sweden  
33  
34  
35

36 \* Corresponding author:  
37

38 Johanna Jonsson  
39

40 Karolinska Institutet  
41

42 Institute of Environmental Medicine, Unit of Occupational Medicine  
43

44 Solnavägen 4, 11365  
45

46 Stockholm, SWEDEN  
47

48 [Johanna.Jonsson@ki.se](mailto:Johanna.Jonsson@ki.se)  
49

50 Telephone: +46 737 665367  
51  
52  
53  
54  
55  
56  
57  
58  
59  
60

## ABSTRACT

**Objectives:** Precarious employment is a determinant of poor health and health inequality. However, the evidence of health consequences and mechanisms underlying the associations, are still limited due to a lack of a comprehensive multidimensional definition and measurement instrument. The Employment Precariousness Scale (EPRES) is a Spanish, multidimensional scale, developed to measure degree of precarious employment. The aim of this study was to translate the EPRES-2010 into Swedish, adapt it to the Swedish context, and to assess the psychometric properties of the Swedish EPRES.

**Method:** EPRES was translated, adapted and implemented for data collection within the research project PREMIS. During 2016-2017, questionnaire data was collected from 483 non-standard employees in Stockholm, Sweden, sampled with web-based respondent-driven sampling. Analyses included item descriptive statistics, scale descriptive statistics and exploratory factor analysis.

**Results:** The final EPRES-Se consisted of six dimensions and 23 items. There was a high response rate to all items and response options. Global Cronbach's alpha was 0.83. Subscales 'vulnerability', 'rights' and 'exercise rights' had reliability coefficients between  $\alpha = 0.78-0.89$  and item-subscale correlations between  $r = 0.48-0.78$ . 'Temporariness' had poor reliability ( $\alpha = -0.08$ ) and inter-item correlation ( $r = -0.04$ ), while 'disempowerment' showed acceptable psychometric properties ( $\alpha = 0.5$ ;  $r = 0.34$ ). Exploratory factor analysis confirmed the original EPRES factor structure.

**Conclusions:** 'Vulnerability', 'wages' 'rights', 'exercise rights' and 'disempowerment'

1  
2  
3 worked in the Swedish context; however 'temporariness' would need revising before  
4  
5  
6 implementing the EPRES-Se in further research. Continued work and validation of  
7  
8  
9 EPRES-Se is encouraged. In order to enable international comparisons and  
10  
11 multinational studies, similar studies in other European countries are also called for.  
12  
13  
14  
15

16  
17 **Strengths and limitations of this study:**  
18

- 19 • First translation and adaptation of the EPRES-2010 to Swedish and the Swedish  
20 context  
21  
22
- 23 • First assessment of the psychometric properties of the EPRES-Se  
24  
25
- 26 • Relatively small sample restricted to non-standard employees  
27  
28
- 29 • Limited generalizability of results  
30  
31  
32  
33  
34  
35  
36  
37  
38  
39  
40  
41  
42  
43  
44  
45  
46  
47  
48  
49  
50  
51  
52  
53  
54  
55  
56  
57  
58  
59  
60

## INTRODUCTION

1  
2  
3  
4  
5  
6 Precarious employment (PE) is considered a social determinant of poor health and  
7  
8 health inequality (1-3). PE is present in both developing as well as developed countries  
9  
10 (4, 5). However, evidence of the health consequences of precarious employment, and  
11  
12 by which mechanisms PE harm workers' health, is still limited due to the lack of a  
13  
14 comprehensive multidimensional definition and measurement instrument (6). This lack  
15  
16 also brings about challenges in terms of capturing the size of the population in  
17  
18 precarious employment, conducting occupational health and safety surveillance (6, 7),  
19  
20 as well as cross-country comparisons. The Employment Precariousness Scale (EPRES) is  
21  
22 a Spanish questionnaire developed to measure six dimensions of precarious  
23  
24 employment. EPRES has previously been validated in Spanish and Chilean populations  
25  
26 (8-11), and also applied to the population of Catalonia (12), but as of yet there is no  
27  
28 Swedish translation or adaptation.  
29  
30  
31  
32  
33  
34  
35  
36  
37  
38

### Precarious Employment

39  
40  
41 During the past decades, neoliberal economics and policies together with increased  
42  
43 globalization, trade competition, technological innovation and financial crises, has had  
44  
45 a considerable impact on the dynamics of the labour market (5, 13, 14). These impacts  
46  
47 have had several implications, including an increase in privatization, downsizing,  
48  
49 outsourcing, a weakening of union input and collective regulation, and a more  
50  
51 competitive and uncertain context for workers, with increases in flexible work,  
52  
53 unemployment and non-standard employment arrangements (5, 13, 14). Furthermore,  
54  
55  
56  
57  
58  
59  
60

1  
2  
3 there has been a decline in attachment to employers, risk shifting from employer to  
4  
5 employees, growth in perceived and actual job insecurity and work-based stress, as  
6  
7 well as diminished bargaining power and rights (13, 14).  
8  
9

10  
11 Non-standard arrangements, in comparison with standard employment  
12  
13 contracts (i.e., open-ended full-time contracts), includes part-time work  
14  
15 (underemployment), temporary work, temporary agency work, zero hour contracts,  
16  
17 "gig" work arrangements and self-employment (1, 4, 7, 14, 15). Non-standard work can  
18  
19 also include holding multiple jobs (16). A comprehensive term used to describe forms  
20  
21 of non-standard employment is "precarious employment" (17). Precarious employment  
22  
23 does not, however, solely refer to the type of employment, but also to unfavorable  
24  
25 employment conditions, such as vulnerability, low pay, low levels of social security and  
26  
27 rights (3, 4, 14, 17-21). As these elements are not exclusively found in non-standard  
28  
29 employments *per se*, employees in a standard employment also are at risk of  
30  
31 experiencing precariousness (14, 22, 23). Thereby, it is important to move beyond a  
32  
33 simplistic categorical grouping of employment, such as temporary vs. permanent, and  
34  
35 instead work towards a comprehensive multidimensional approach that enables a  
36  
37 better understanding of precarious employment (16, 23). Today, several proposals and  
38  
39 attempts to create multidimensional constructs capturing precarious employment exist  
40  
41 (e.g., (10, 21, 24-26)), but as of yet there is no universally accepted definition.  
42  
43  
44  
45  
46  
47  
48  
49  
50  
51  
52

53  
54 By the means of a cross-national multidimensional definition and measurement  
55  
56 instrument of precarious employment, comparative and more precise estimations of  
57  
58 health effects are made possible. Previously, PE has been linked to an array of health  
59  
60

1  
2  
3 issues including mental and physical health (2, 27) and occupational injuries (28).  
4  
5  
6 Previous research on related concepts such as job insecurity and temporary  
7  
8 employment also show consistent associations with various health outcomes (29-32).  
9  
10  
11 Mechanisms linking precarious employment and health are not yet fully understood  
12  
13 but pathways that have been suggested include more harmful working conditions,  
14  
15 limited control over one's professional and personal lives, feelings of insecurity and  
16  
17 incomes below the subsistence level, which consequently can affect other social  
18  
19 determinants of health such as housing quality, lifestyles and so on (33).  
20  
21  
22  
23  
24  
25  
26

### 27 **The Employment Precariousness Scale (EPRES)**

28  
29  
30 EPRES is a Spanish, multidimensional theory-based scale, developed to measure  
31  
32 degree of precarious employment among waged and salaried workers (8). EPRES is  
33  
34 comprised of 22 items and six subscales corresponding to six dimensions:  
35  
36 'temporariness' (contract duration; two items), 'wages' (low or insufficient; possible  
37  
38 economic deprivation; three items), 'disempowerment' (level of negotiation of  
39  
40 employment conditions; two items), 'vulnerability' (defenselessness to authoritarian  
41  
42 treatment; five items), 'rights' (entitlement to workplace rights and social security  
43  
44 benefits; four items) and 'exercise rights' (powerlessness, in practice, to exercise  
45  
46 workplace rights; six items) (8, 9). EPRES items are scored on a 5-point or 3-point scale,  
47  
48 depending on item, and all items taken together will give a global score ranging  
49  
50 between 0 (least precarious) and 4 (most precarious) (34). EPRES has demonstrated  
51  
52 good acceptability, good internal consistency and evidence of construct validity in  
53  
54  
55  
56  
57  
58  
59  
60



1  
2  
3 Spanish and Chilean populations (8, 9). The original EPRES scale was revised in 2015  
4  
5 (hereafter known as EPRES-2010), which showed good metric properties and improved  
6  
7  
8 sensitivity to worker vulnerability and employment stability (10).  
9  
10

### 11 12 13 **Precarious employment in Sweden**

14  
15  
16 It is challenging to put Sweden in a comparative context of precarious employment as  
17  
18 there is no consensus on its operationalization. Sweden has, according to some  
19  
20 definitions (as defined by a typological approach of 11 indicators), one of the smallest  
21  
22 proportions of precarious employees among the Scandinavian countries (19). However,  
23  
24 in other measures (defined by involuntary part-time work, temporary employment and  
25  
26 fear of job-loss) Sweden has the highest proportion of precarious employed individuals  
27  
28 (25) and the highest proportion of fixed-term employment contracts (35) in the same  
29  
30 context. Reports show that the Swedish labour market is growing increasingly more  
31  
32 insecure, especially for temporary employees (36, 37). The proportion of temporary  
33  
34 employees has been stable around 15-17% since the late 1990's (37, 38). There has,  
35  
36 however, been reports on a shift within this group where longer-term positions have  
37  
38 been replaced by a higher proportion of on-demand employees and day laborers,  
39  
40 which are more precarious by nature (36, 37, 39). Especially women (19%, compared to  
41  
42 15% among men), 16-24 year-olds (56%, compared to 21% among 25-34 year-olds  
43  
44 and 9% among 35-44 year-olds), and foreign born (24%, compared to 15% among  
45  
46 individuals born in Sweden) are likely of holding a temporary employment (37). These  
47  
48 are groups that reportedly are exposed to high employment precariousness (19).  
49  
50  
51  
52  
53  
54  
55  
56  
57  
58  
59  
60

1  
2  
3 Further, around 10% of the employees in Sweden are not covered by collective  
4 bargaining agreements and around 9% have multiple jobs. The latter has seen an  
5 increase with 1.5% percentage points since 2005 (39). According to a definition by the  
6 Swedish Labour Policy Council, the group of atypical employees is constituted by those  
7 that fulfil one of the following: not being covered by a collective bargaining agreement,  
8 have a temporary employment, are employed by a temp agency or are self-employed,  
9 have their own company, hold multiple jobs or are working in the informal sector. This  
10 group of atypical workers is estimated to be around 35-39% of the Swedish workforce  
11 (39), and likely of experiencing precariousness.

12  
13  
14  
15  
16  
17  
18  
19  
20  
21  
22  
23  
24  
25  
26  
27  
28  
29  
30  
31  
32  
33  
34  
35  
36  
37  
38  
39  
40  
41  
42  
43  
44  
45  
46  
47  
48  
49  
50  
51  
52  
53  
54  
55  
56  
57  
58  
59  
60  
Thereby, despite the stable levels of temporary employment in Sweden, it could  
be assumed that the level of precariousness has increased on the Swedish labour  
market. A study from Finland, however, indicate that the precariat (as defined by  
atypical employment, previous unemployment, fear of job-loss, poor prospects of  
employment and low earnings) has not seen an increase the past couple of decades  
(40). Without longitudinal studies assessing changes in precarious employment over  
time, evidence in Sweden remains inconclusive.

A translation and adaptation of EPRES to Swedish and the Swedish context is  
thus an important step in the direction to fully comprehend the distribution and trends  
of precarious employment in the Swedish population, as well as to allow for cross-  
country comparisons. Such an instrument would also enable well-needed studies on  
the health outcomes of precarious employment.

## Aim

The aim of this study was to translate the EPRES-2010 into Swedish, adapt it to the Swedish context, and to assess the psychometric properties of the Swedish EPRES.

## METHOD

In order to fulfil the study aims, the EPRES-2010 was first translated into Swedish and subsequently adapted to suit the Swedish context (hereafter known as EPRES-Se). Thereafter, EPRES-Se was piloted and implemented as a part of the survey used in the research project Precarious Employment in Stockholm (PREMIS).

### Translation and adaptation of EPRES

The translation and adaptation process of the EPRES-2010 consisted of five steps: 1. Translation from Spanish to Swedish; 2. Cultural adaptation to fit the Swedish context; 3. Back translation to Spanish and adjustments; 4. Pilot testing; 5. Final adaptations based on user feedback in pilot.

1. The Spanish version of the revised EPRES-2010 scale, which has been published elsewhere (10), was translated into Swedish. The translation was done by a bilingual member of the research team (TB) in close discussion with AV, a native Spanish speaker with previous experience of validation studies of EPRES.

2. Several adaptations of the questionnaire were implemented in order to fit Swedish labour market conditions. The questionnaire and its translation was discussed during workshops in the project team, which consisted of Swedish, Spanish and Chilean

1  
2  
3 researchers within public - and occupational health, as well as within the reference  
4  
5 group involved in PREMIS, which consisted of labour union members and workers with  
6  
7 experience of precarious employment.  
8  
9

10  
11 3. Several drafts of the Swedish questionnaire were translated back to Spanish  
12  
13 during the adaptation process and discussed until the final translation was decided  
14  
15 upon.  
16  
17

18  
19 4. A two-stage pilot testing was performed: first face-to-face with five volunteers  
20  
21 from the reference group, and thereafter online with six volunteers who were currently  
22  
23 working but without a permanent full-time employment. The latter were also asked to  
24  
25 participate in an evaluation of the survey either via the phone or online.  
26  
27

28  
29 5. With the input from the pilot, a few minor adaptations were made to the  
30  
31 EPRES.  
32  
33

34  
35  
36  
37 Further, in order to offer non-Swedish speaking participants an opportunity to  
38  
39 participate in the PREMIS-study, the PREMIS-survey, including the Swedish version of  
40  
41 EPRES, was translated into English by an external, professional, translator. After the  
42  
43 translation, minor changes in terms of style and terminology was made by the research  
44  
45 group. The English translation of the EPRES-Se was not validated in this study, nor has  
46  
47 it been validated in any previous studies.  
48  
49  
50  
51  
52  
53  
54  
55

## 56 **Implementation of the EPRES-Se**

57

58  
59 PREMIS is an ongoing, longitudinal, web-based study conducted in Stockholm county,  
60

1  
2  
3 Sweden. PREMIS aims at methodological development in terms of sampling strategies  
4  
5 and assessment of precarious employment, as well as at studying health outcomes of  
6  
7 precarious employment. In 2016-2017, 483 non-standard employees were sampled  
8  
9 with web-based respondent-driven sampling (webRDS). WebRDS uses peer-to-peer  
10  
11 recruitment to build a sample from populations that are hard-to-reach and therefore  
12  
13 lacks a sampling frame (41). Questionnaire data was collected through an online survey  
14  
15 tool specifically developed for RDS (42). The PREMIS-survey included all the items of  
16  
17 the EPRES-Se, as well as questions on employment type, occupational environment,  
18  
19 health outcomes and background. The survey could be completed in Swedish or  
20  
21 English.  
22  
23  
24  
25  
26  
27  
28  
29  
30

31 As one of the aims of PREMIS was to sample precarious employees with  
32  
33 webRDS, a process which has been described elsewhere (43), participation in the study  
34  
35 was restricted to individuals considered particularly vulnerable to precarious  
36  
37 employment conditions, such as individuals with temporary employment, on-demand  
38  
39 employment, involuntary part-time employment and involuntary self-employment. The  
40  
41 inclusion criteria for participants were: living and/or working in Stockholm County,  
42  
43 being aged 18-65 years, having and indicating a Swedish personal identification  
44  
45 number, and having a current employment. Exclusion criteria were: having a fixed, full-  
46  
47 time, employment, being voluntarily self-employed or being a student. Out of the 483  
48  
49 participants included in the sample, 68 participants were excluded due to not matching  
50  
51 criteria of county (n=6), re-using or giving an incorrect personal number (n = 8 and  
52  
53 n=17, respectively), being underage (n = 1) or suspected cheating (i.e., systematic  
54  
55  
56  
57  
58  
59  
60

1  
2  
3 repeated participation; n=36), giving a final sample of 415 participants.  
4  
5

### 6 7 **Statistical analysis** 8

9  
10 Item descriptive statistics (mean, standard deviations, response frequencies, missing  
11 responses and Pearson item-subscale correlations) and scale descriptive statistics  
12 (mean, standard deviations, missing items, range, floor and ceiling effects, and  
13 reliability (Cronbach's alpha coefficient) were assessed for the entire sample.  
14  
15 Participants answering "No answer" on the question on income (question three in  
16 EPRES-Se) were excluded from the analyses of this question due to the ambiguity of  
17 the response alternative. Exploratory factor analysis was conducted in order to  
18 determine the underlying factor structure of the data. Principal axis factoring, with  
19 varimax rotation, extracting eigenvalues >1 was used, which is the method used in  
20 previous EPRES-studies (8-10). Subanalyses were conducted without informal workers,  
21 i.e., participants answering "I have no contract" to the question on contract duration  
22 (question one in EPRES-Se). Further, as the sample was recruited with respondent-  
23 driven sampling (RDS), weighted analyses were conducted in addition to the  
24 unweighted analyses. RDSII weights (44) were calculated in RDS Analyst 0.42 for  
25 Windows (Los Angeles, CA). The results from the weighted analyses will be shown in  
26 full in the supplementary material. All analyses were performed using SPSS version 23  
27 (IBM SPSS Statistics for Windows, Version 23. Armonk, NY:IBM Corp).  
28  
29  
30  
31  
32  
33  
34  
35  
36  
37  
38  
39  
40  
41  
42  
43  
44  
45  
46  
47  
48  
49  
50  
51  
52  
53  
54  
55  
56

### 57 **Ethical considerations** 58

59  
60 Permission from the Regional Ethics Committee of Stockholm was given for the study,

1  
2  
3 with dnr: 2016/1291-31/5. Informed consent was attained from all participants by the  
4  
5 respondent clicking "Yes" to the question "I understand the information given above  
6  
7 and want to participate".  
8  
9

## 10 11 12 13 14 **Patient and public involvement**

15  
16 In PREMIS, a reference group consisting of individuals with experience from  
17  
18 precarious employment and labour union representatives, was involved in the design  
19  
20 of the PREMIS-survey (design of survey and formulation of questions not otherwise  
21  
22 standardized) and data collection process (deciding on the appropriate compensation  
23  
24 for participation, recruitment of participants and testing the survey software) through  
25  
26 active discussions and workshops. Results will be disseminated to study participants  
27  
28 through the website of the PREMIS-study.  
29  
30  
31  
32  
33  
34  
35  
36  
37  
38  
39

## 40 **RESULTS**

### 41 42 43 44 45 **Adaptations of EPRES-Se**

46  
47 The following adaptations were made to the EPRES-Se in comparison with EPRES-2010.  
48  
49

- 50  
51 (1) The response alternatives in 'temporariness' were stated as categories, as opposed  
52  
53 to free text values of number of days, months or years in EPRES-2010, in order to  
54  
55 increase usability in the web-survey context. For the same reason, the question on  
56  
57 contract duration which contained three dependent items in EPRES-2010, was  
58  
59  
60

1  
2  
3 collapsed into one question in EPRES-Se. In addition, the response options "I do  
4  
5 not have a contract" was added in order to capture informal work and "Do not  
6  
7 know" was added in order to capture poor contractual relationship.  
8  
9

10  
11 (2) In 'wages', the question of income was presented in local currency (SEK) and  
12  
13 intervals were set to ~300 EUR as the 150-200 EUR intervals used in the EPRES-2010  
14  
15 version were perceived as too narrow in the Swedish context. In EPRES-2010,  
16  
17 intervals were 150 EUR - 200 EUR below a monthly income of 1200 EUR, and 300  
18  
19 EUR above an income of 1201 EUR.  
20  
21  
22

23  
24 (3) In EPRES-2010, the two response alternatives capturing working conditions that  
25  
26 were decided unilaterally by the employer, were merged into one response option  
27  
28 in the Swedish adaptation in order to enhance usability . Further, as some workers,  
29  
30 especially freelancers, are given a fixed budget with no hours specified, the  
31  
32 response alternative "Not applicable. I work project-based" was added for the  
33  
34 question on how salary was decided upon,  
35  
36  
37  
38

39  
40 (4) One of the items in 'vulnerability', "afraid to demand better working conditions...",  
41  
42 was taken from the original EPRES-scale (8) according to the recommendations  
43  
44 made by Vives et al. 2015 (10).  
45  
46  
47

48  
49 (5) In 'rights', the question on pension in EPRES-2010 , which contained both pension  
50  
51 due to old age and disability, was split in two as these are distinct systems unrelated  
52  
53 to one another in the Swedish context. Retirement pension (i.e., pension due to old  
54  
55 age) was kept in EPRES-Se and disability pension was removed. However, a new  
56  
57  
58  
59  
60



1  
2  
3 item assessing the right to sickness benefit was added in the subscale instead,  
4  
5 capturing both long term sick leave and shorter spells of sickness absence.  
6  
7

8 (6) In 'exercise of rights' the item on taking a day off for family reasons was clarified by  
9  
10 adding "care of a sick child, care of a sick relative etc." within brackets.  
11  
12  
13  
14  
15

## 16 **EPRES-Se**

17  
18 The final version of EPRES-Se consisted of a total of 23 items and six dimensions:  
19  
20 'temporariness' (two items), 'wages' (three items), 'disempowerment' (two items),  
21  
22 'vulnerability' (five items), 'rights' (five items) and 'exercise rights' (six items). As in the  
23  
24 EPRES-2010, the response scales were 5-point ordinal scales for 'temporariness', 5-  
25  
26 point ordinal and 5-point frequency scales for 'wages', 5-point frequency scales for  
27  
28 'vulnerability' and 'exercise rights', and 5-point and 3-point categorical scales for  
29  
30 'disempowerment' and 'exercise rights', respectively. See EPRES-Se in supplementary  
31  
32 material A.  
33  
34  
35  
36  
37  
38  
39  
40  
41  
42

## 43 **Coding of EPRES-Se**

44  
45 Similarly as EPRES-2010, subscale scores were computed as averages and transformed  
46  
47 into a 0-4 scale. The global EPRES score is the average of the six subscales, ranging  
48  
49 from 0-4, where 0 represent the lowest level of precariousness and 4 represent the  
50  
51 highest level of precariousness.  
52  
53  
54

55  
56 For questions in 'temporariness', response options were coded slightly different  
57  
58 compared to EPRES-2010 in order to accommodate the changes made in the Swedish  
59  
60

1  
2  
3 version. For instance, in the question of duration of contract, response options “Do not  
4 have a contract” and “Do not know” were coded as 4 (most precarious), in comparison  
5  
6 with the Spanish version where a contract length of less than six months was coded as  
7  
8  
9  
10  
11 4. In the question on income, intervals were larger and consistent in size, as compared  
12  
13 to the Spanish version. The cut-offs for income were based on the Swedish median net  
14  
15 income for 2016, which was just above 18000 SEK for individuals 20-64 years of age  
16  
17 (45). The merging of items in ‘disempowerment’ did not affect the coding. The coding  
18  
19 of the individual items along with the English translation of EPRES-Se can be found in  
20  
21 the supplementary material B.  
22  
23  
24  
25  
26  
27  
28  
29

### 30 **Issues leading to recoding of ‘temporariness’ dimension**

31  
32 When conducting the data analyses it was revealed that 79% (n=139) of the  
33  
34 respondents answering ‘indefinitely’ to the EPRES question on contract length (“How  
35  
36 long is your current employment contract valid?”) also answered that they were  
37  
38 employed on demand/by the hour on a question assessing employment type included  
39  
40 in the PREMIS-survey. We suspected that this combination could be a type of “zero  
41  
42 hour” contract, in which the employer is not required to offer the employee any fixed  
43  
44 number of hours of work at all per day, week or month (35). Thereby, this type of  
45  
46 employment situation could be regarded as contingent with a high degree of  
47  
48 precariousness. This was confirmed as the group indicating an indefinite contract  
49  
50 length *and* on-demand/by the hour employment, were most similar (in terms of the  
51  
52 other EPRES subscales) to employees with a contract lasting less than 1 month and  
53  
54  
55  
56  
57  
58  
59  
60

1  
2  
3 least alike employees with a fixed-term contract >2 years. Consequently, we re-coded  
4  
5  
6 the group with an indefinite contract *and* on demand/by the hour-employment from  
7  
8  
9 0 to 3 (i.e., the same coding as the response alternative <1 month contract). Those with  
10  
11 any other employment type and an indefinite contract (n=36) remained coded as 0.  
12  
13  
14 See results of subscale-average comparisons in the supplementary material C.  
15  
16  
17  
18

### 19 **Psychometric properties of EPRES-Se**

20  
21  
22 The demographic characteristics of the sample is shown in Table 1. The sample  
23  
24 consisted of a larger proportion 25-29 year-olds (45%) compared to the other age-  
25  
26  
27 groups, and a larger proportion women (54%) as compared to men. Further, the sample  
28  
29 was dominated by workers employed on demand/by the hour (59%).  
30  
31

32  
33 Table 2 shows the item-descriptive statistics. There was a small proportion of  
34  
35 missing values (< 3%). Item means were similar within subscales, with the greatest  
36  
37 mean difference found within 'wages' (item mean difference = 1.6). All response  
38  
39 options within the items were used by participants, although to a varying extent. Item-  
40  
41 subscale correlations were around 0.6-0.8 in 'vulnerability' and 'exercise of rights'; and  
42  
43 around 0.4-0.6 in 'wages' and 'rights'. There was a weak correlation between item and  
44  
45 subscale in 'disempowerment' and no correlation between items in 'temporariness'.  
46  
47  
48  
49  
50  
51 With exception of the latter, all items correlated higher with their corresponding  
52  
53 subscale compared to other subscales.  
54  
55  
56  
57

#### 58 **Table 1. Demographic characteristics of the study** 59 **population (frequencies and percentages), N=415**

---

|                   |                                  | N   | %  |
|-------------------|----------------------------------|-----|----|
| <b>Age</b>        | 18-24                            | 122 | 29 |
|                   | 25-29                            | 185 | 45 |
|                   | 30-64                            | 108 | 26 |
| <b>Sex</b>        | Male                             | 190 | 46 |
|                   | Female                           | 225 | 54 |
| <b>Employment</b> | Temporary employment             | 121 | 29 |
|                   | Employed on demand/by the hour   | 243 | 59 |
|                   | Self-employed (involuntary)      | 13  | 3  |
|                   | Intern                           | 2   | 1  |
|                   | Part-time employed (involuntary) | 36  | 9  |

Table 3 shows the scale descriptive statistics. The subscale mean scores ranged between 1.4 and 2.3, with a global average of 1.9. The proportion of participants with any missing values in the subscales were around 1%, except in the case of 'wages' where it was 3.1%. The latter also included participants answering "No answer" (n=9). Subscale scores ranged between 0-4, and global scale score ranged between 0.09-3.07. Both floor and ceiling effects were generally low (< 5%), with floor effects being highest for 'disempowerment' (9.2%) and 'vulnerability' (11.7%), and ceiling effects being highest for 'rights' (18.0%). Cronbach's alpha coefficients were around 0.7 or higher for 'wages', 'vulnerability', 'rights' and 'exercise of rights'. Only 'temporariness' exhibited a Cronbach's alpha coefficient close to 0. The global alpha coefficient was 0.83.

The exploratory factor analysis extracted six factors with eigenvalues above 1 (eigenvalues = 5.3; 3.2; 2.3; 1.6; 1.3; 1.1). The emerging factors were the same as in EPRES-2010, thereby confirming the original factor structure. Together, the six factors explained 64.1% of the variance. The six factors and their rotated factor loadings are

1  
2  
3 shown in Table 4. All loadings were above 0.35, except in the case of “length of  
4  
5  
6 contract”.

7  
8 Subanalyses were conducted in order to investigate the potential effect of  
9  
10 including informal workers in the sample (n=35), which had minor influence on the  
11  
12 correlation between temporariness-items ( $r=0.002$ ) and reliability of the subscale (-  
13  
14 0.003). However, in the factor analysis seven factors with eigenvalues >1 emerged (5.3;  
15  
16 3.2; 2.3; 1.6; 1.3; 1.1; 1.0), explaining 68.5% of the variance. The seventh factor was  
17  
18 caused by a split of the temporariness dimension, grouping items on length of contract  
19  
20 (duration) and time working for employer (tenure) in separate factors, with factor  
21  
22 loadings of 0.33 and 0.42 respectively.  
23  
24  
25  
26  
27  
28  
29

30 Analyses for the weighted population sample resulted in virtually the same  
31  
32 results in regard to item-subscale correlations, Cronbach’s alpha coefficients, floor  
33  
34 and ceiling effects, as well as factor loadings from the exploratory factor analysis of  
35  
36 EPRES-Se, and did thereby not affect the interpretation of the results. See the  
37  
38 weighted results in table 1-4 in Supplementary material D.  
39  
40  
41  
42  
43  
44  
45  
46  
47  
48  
49  
50  
51  
52  
53  
54  
55  
56  
57  
58  
59  
60

**Table 2. Item descriptive statistics and Pearson item-subscale correlations of EPRES-Se**

| Item                              | Missing % <sup>1</sup> | Mean | SD <sup>2</sup> | Response value frequency (%) <sup>3</sup> |            |            |            |           | Pearson item subscale correlations <sup>4</sup> |             |             |             |             |      |
|-----------------------------------|------------------------|------|-----------------|-------------------------------------------|------------|------------|------------|-----------|-------------------------------------------------|-------------|-------------|-------------|-------------|------|
|                                   |                        |      |                 | 0                                         | 1          | 2          | 3          | 4         | T                                               | W           | D           | V           | R           | ER   |
| <b>Temporariness<sup>5</sup></b>  |                        |      |                 |                                           |            |            |            |           |                                                 |             |             |             |             |      |
| Length of contract                | 0.0                    | 2.6  | 1.1             | 36 (8.7)                                  | 24 (5.8)   | 75 (18.1)  | 228 (54.9) | 52 (12.5) | -                                               | 0.04        | 0.05        | 0.06        | 0.08        | 0.04 |
| Time working empl.                | 0.0                    | 2.1  | 0.9             | 17 (4.1)                                  | 92 (22.2)  | 171 (41.2) | 119 (28.7) | 16 (3.9)  | <b>0.04</b>                                     | -           | 0.06        | 0.11        | -           | 0.31 |
|                                   |                        |      |                 |                                           |            |            |            |           | <b>0.04</b>                                     |             |             | 0.04        |             |      |
| <b>Wages</b>                      |                        |      |                 |                                           |            |            |            |           |                                                 |             |             |             |             |      |
| Income monthly                    | 2.2                    | 2.4  | 1.2             | 43 (10.6)                                 | 45 (11.1)  | 87 (21.4)  | 171 (42.1) | 60 (14.8) | 0.09                                            | <b>0.39</b> | 0.14        | -           | 0.29        | 0.17 |
| Cover basic need                  | 1.0                    | 0.8  | 0.9             | 175 (42.6)                                | 171 (41.6) | 44 (10.7)  | 14 (3.4)   | 7 (1.7)   | -                                               | <b>0.60</b> | 0.07        | 0.21        | 0.13        | 0.26 |
| Cover unforeseen expen.           | 1.0                    | 1.8  | 1.1             | 60 (14.6)                                 | 113 (27.5) | 136 (33.1) | 70 (17.0)  | 32 (7.8)  | 0.02                                            | <b>0.55</b> | 0.08        | 0.39        | 0.14        | 0.26 |
| <b>Disempowerment<sup>5</sup></b> |                        |      |                 |                                           |            |            |            |           |                                                 |             |             |             |             |      |
| Working hour settled              | 0.0                    | 2.1  | 1.2             | 84 (20.2)                                 | 8 (1.9)    | 110 (26.5) | 190 (45.8) | 23 (5.5)  | 0.12                                            | 0.17        | <b>0.34</b> | 0.10        | 0.26        | 0.23 |
| Salary settled                    | 0.0                    | 2.2  | 1.2             | 77 (18.6)                                 | 8 (1.9)    | 101 (24.3) | 210 (50.6) | 19 (4.6)  | 0.07                                            | 0.03        | <b>0.34</b> | 0.02        | 0.13        | 0.09 |
| <b>Vulnerability</b>              |                        |      |                 |                                           |            |            |            |           |                                                 |             |             |             |             |      |
| Demand work cond.                 | 1.0                    | 1.6  | 1.2             | 79 (19.2)                                 | 129 (31.4) | 113 (27.5) | 63 (15.3)  | 27 (6.6)  | 0.01                                            | 0.13        | 0.09        | <b>0.75</b> | 0.04        | 0.28 |
| Unfair treatment                  | 1.0                    | 1.3  | 1.1             | 114 (27.7)                                | 159 (38.7) | 67 (16.3)  | 50 (12.2)  | 21 (5.1)  | -                                               | 0.12        | 0.08        | <b>0.78</b> | -           | 0.26 |
|                                   |                        |      |                 |                                           |            |            |            |           | 0.03                                            |             |             |             | 0.01        |      |
| Afraid fired                      | 1.0                    | 1.5  | 1.2             | 106 (25.8)                                | 130 (31.6) | 81 (19.7)  | 60 (14.6)  | 34 (8.3)  | 0.06                                            | 0.20        | 0.10        | <b>0.78</b> | 0.04        | 0.35 |
| Treated authoritarian             | 1.0                    | 1.3  | 1.1             | 107 (26.0)                                | 160 (38.9) | 87 (21.2)  | 36 (8.8)   | 21 (5.1)  | -                                               | 0.20        | -           | <b>0.63</b> | 0.02        | 0.23 |
|                                   |                        |      |                 |                                           |            |            |            |           | 0.04                                            |             | 0.01        |             |             |      |
| Easily replaced                   | 1.0                    | 1.6  | 1.3             | 91 (22.1)                                 | 124 (30.2) | 92 (22.4)  | 55 (13.4)  | 49 (11.9) | 0.06                                            | 0.22        | 0.02        | <b>0.74</b> | 0.04        | 0.27 |
| <b>Rights</b>                     |                        |      |                 |                                           |            |            |            |           |                                                 |             |             |             |             |      |
| Right parental leave              | 1.2                    | 1.2  | 0.8             | 100 (24.4)                                | 130 (31.7) | 180 (43.9) |            |           | 0.18                                            | 0.16        | 0.26        | 0.05        | <b>0.58</b> | 0.16 |
| Right retirement                  | 1.2                    | 1.2  | 0.8             | 107 (26.1)                                | 113 (27.6) | 190 (46.3) |            |           | 0.26                                            | 0.22        | 0.23        | 0.07        | <b>0.60</b> | 0.16 |
| Right unemployment                | 1.2                    | 1.0  | 0.9             | 156 (38.0)                                | 100 (24.4) | 154 (37.6) |            |           | 0.15                                            | 0.24        | 0.15        | -           | <b>0.60</b> | 0.08 |
|                                   |                        |      |                 |                                           |            |            |            |           |                                                 |             |             | 0.01        |             |      |
| Right severance pay               | 1.2                    | 1.4  | 0.6             | 20 (4.9)                                  | 223 (54.4) | 167 (40.7) |            |           | 0.11                                            | 0.06        | 0.03        | -           | <b>0.48</b> | 0.03 |
|                                   |                        |      |                 |                                           |            |            |            |           |                                                 |             |             | 0.02        |             |      |
| Right sickness benefits           | 1.2                    | 0.9  | 0.8             | 160 (39.0)                                | 110 (26.8) | 140 (34.1) |            |           | 0.26                                            | 0.18        | 0.17        | 0.03        | <b>0.53</b> | 0.12 |
| <b>Exercise of rights</b>         |                        |      |                 |                                           |            |            |            |           |                                                 |             |             |             |             |      |

1  
2  
3  
4  
5  
6  
7  
8  
9  
10  
11  
12  
13  
14  
15  
16  
17  
18  
19  
20  
21  
22  
23  
24  
25  
26  
27  
28  
29  
30  
31  
32  
33  
34  
35  
36  
37  
38  
39  
40  
41  
42  
43  
44  
45  
46

|                     |     |     |     |            |            |            |           |           |      |      |      |      |      |             |
|---------------------|-----|-----|-----|------------|------------|------------|-----------|-----------|------|------|------|------|------|-------------|
| Take weekend off    | 1.0 | 1.6 | 1.1 | 86 (20.9)  | 93 (22.6)  | 154 (37.5) | 48 (11.7) | 30 (7.3)  | -    | 0.23 | 0.18 | 0.18 | 0.10 | <b>0.62</b> |
|                     |     |     |     |            |            |            |           |           | 0.01 |      |      |      |      |             |
| Take vacation       | 1.2 | 1.9 | 1.1 | 50 (12.2)  | 88 (21.5)  | 163 (39.8) | 77 (18.8) | 32 (7.8)  | 0.14 | 0.22 | 0.20 | 0.30 | 0.15 | <b>0.68</b> |
| Take day off        | 1.2 | 1.6 | 1.1 | 88 (21.5)  | 85 (20.7)  | 166 (40.5) | 50 (12.2) | 21 (5.1)  | 0.15 | 0.19 | 0.21 | 0.24 | 0.16 | <b>0.75</b> |
| Take day off, pers. | 1.0 | 1.9 | 1.2 | 63 (15.3)  | 78 (19.0)  | 159 (38.7) | 69 (16.8) | 42 (10.2) | 0.11 | 0.21 | 0.08 | 0.36 | 0.07 | <b>0.74</b> |
| Sick leave          | 1.2 | 1.6 | 1.1 | 98 (23.9)  | 74 (18.0)  | 163 (39.8) | 50 (12.2) | 25 (6.1)  | 0.06 | 0.22 | 0.20 | 0.26 | 0.12 | <b>0.69</b> |
| Go to doctor        | 1.0 | 1.1 | 1.1 | 140 (34.1) | 126 (30.7) | 106 (25.8) | 25 (6.1)  | 14 (3.4)  | 0.11 | 0.26 | 0.09 | 0.25 | 0.14 | <b>0.64</b> |

<sup>1</sup> Proportion of participants with any missing item; <sup>2</sup> SD=Standard Deviation; <sup>3</sup> Frequency (%) of participants indicating the specific response. 0 indicates the lowest precariousness score, 4 indicating the highest precariousness score. <sup>4</sup> Corrected for overlap, i.e., item is removed from the corresponding subscale. T=Temporariness; W=Wages; D=Disempowerment ;V=Vulnerability; R=Rights; ER=Exercise rights. <sup>5</sup> Inter-item correlations

For peer review only

**Table 3. Scale descriptive statistics: range, mean, standard deviation (SD), floor and ceiling effects and Cronbach's alpha coefficient**

| Subscale           | Items | Mean | SD  | Missing (%) <sup>1</sup> | Obs. range | Floor % <sup>2</sup> | Ceiling % <sup>2</sup> | Cronbach's alpha |
|--------------------|-------|------|-----|--------------------------|------------|----------------------|------------------------|------------------|
| Temporariness      | 2     | 2.3  | 0.7 | 0.0                      | 0-4        | 0.5                  | 1.0                    | -0.08            |
| Wages              | 3     | 1.6  | 0.8 | 3.1                      | 0-4        | 4.2                  | 0.7                    | 0.69             |
| Disempowerment     | 2     | 2.1  | 1.0 | 0.0                      | 0-4        | 9.2                  | 1.4                    | 0.50             |
| Vulnerability      | 5     | 1.4  | 1.0 | 1.0                      | 0-4        | 11.7                 | 1.9                    | 0.89             |
| Rights             | 5     | 2.3  | 1.2 | 1.2                      | 0-4        | 2.9                  | 18.0                   | 0.78             |
| Exercise of rights | 6     | 1.6  | 0.9 | 1.2                      | 0-4        | 6.8                  | 1.0                    | 0.88             |
| EPRES-se           | 23    | 1.9  | 0.5 | 3.4                      | 0.09-3.07  | 0.2                  | 0.2                    | 0.83             |

<sup>1</sup> Proportion of participants with any missing item

<sup>2</sup> Proportion of participants with lowest (floor) and highest (ceiling) EPRES-Se scores

**Table 4. Factor loadings from exploratory factor analysis of the EPRES-Se**

|                         | Factor          |               |             |             |                |               |
|-------------------------|-----------------|---------------|-------------|-------------|----------------|---------------|
|                         | Exercise rights | Vulnerability | Rights      | Wages       | Disempowerment | Temporariness |
| <b>Temporariness</b>    |                 |               |             |             |                |               |
| Length of contract      |                 |               |             |             |                | <b>0.12</b>   |
| Time working empl.      | 0.12            |               | 0.36        |             |                | <b>-0.36</b>  |
| <b>Wages</b>            |                 |               |             |             |                |               |
| Income monthly          | 0.14            | -0.16         | 0.23        | <b>0.49</b> |                | 0.35          |
| Cover basic need        | 0.17            | 0.13          |             | <b>0.71</b> |                |               |
| Cover unforeseen expen. | 0.12            | 0.32          |             | <b>0.79</b> |                | -0.10         |
| <b>Disempowerment</b>   |                 |               |             |             |                |               |
| Working hour settled    | 0.17            |               | 0.21        |             | <b>0.52</b>    | 0.15          |
| Salary settled          |                 |               |             |             | <b>0.60</b>    |               |
| <b>Vulnerability</b>    |                 |               |             |             |                |               |
| Demand work cond.       | 0.14            | <b>0.80</b>   |             |             |                |               |
| Unfair treatment        | 0.11            | <b>0.84</b>   |             |             |                |               |
| Afraid fired            | 0.20            | <b>0.80</b>   |             |             |                |               |
| Treated authoritarian   | 0.11            | <b>0.66</b>   |             | 0.12        |                | 0.13          |
| Easily replaced         | 0.12            | <b>0.77</b>   |             | 0.15        |                |               |
| <b>Rights</b>           |                 |               |             |             |                |               |
| Right parental leave    |                 |               | <b>0.67</b> |             | 0.21           |               |
| Right retirement        |                 |               | <b>0.69</b> |             | 0.16           |               |
| Right unemployment      |                 |               | <b>0.69</b> | 0.11        |                | 0.29          |
| Right severance pay     |                 |               | <b>0.55</b> |             | -0.10          |               |
| Right sickness benefits |                 |               | <b>0.60</b> |             | 0.11           |               |
| <b>Exercise rights</b>  |                 |               |             |             |                |               |



|   |                     |             |      |      |      |       |
|---|---------------------|-------------|------|------|------|-------|
| 1 |                     |             |      |      |      |       |
| 2 |                     |             |      |      |      |       |
| 3 | Take weekend off    | <b>0.65</b> |      |      | 0.10 | 0.14  |
| 4 | Take vacation       | <b>0.70</b> | 0.18 |      |      | -0.13 |
| 5 | Take day off        | <b>0.80</b> | 0.10 | 0.10 |      | -0.13 |
| 6 | Take day off, pers. | <b>0.78</b> | 0.24 |      |      | -0.10 |
| 7 | Sick leave          | <b>0.72</b> | 0.11 |      | 0.12 | 0.15  |
| 8 | Go to doctor        | <b>0.66</b> | 0.11 |      | 0.13 |       |
| 9 |                     |             |      |      |      |       |

Table showing factor loadings >0.1

## DISCUSSION

### Key findings and summary

The scale generally performed well, with a small proportion of missing values across all subscales, usage of all response options and good global reliability. The factor structure established in the Spanish EPRES-2010 (10) was confirmed. The subscales 'vulnerability', 'wages', 'rights' and 'exercise of rights' generally worked well in the Swedish context, with high item-subscale correlations, subscale reliability and factor loadings. However, 'temporariness' did not perform as expected and would need revision. In addition, although 'disempowerment' showed acceptable psychometric properties, the subscale might benefit from additional adaptation.

### 'Temporariness'

As opposed to previous studies, (8-10), temporariness yielded very poor psychometric properties. The items in the subscale did not correlate, there was a negative Cronbach's alpha coefficient and a low factor loading for the item on contract duration. Only minor changes in terms of correlation and Cronbach's alpha was initiated by the removal of informal workers and self-employed. This subanalysis

1  
2  
3 did, however, split the temporariness dimension in two separate factors, both of  
4  
5 which had higher factor loadings. On the basis of these results, we believe that the  
6  
7 temporariness dimension needs further development and evaluation in a population  
8  
9 of both standard and non-standard employees. Based on the results from the present  
10  
11 study, we offer the following thoughts on this matter:  
12  
13  
14

15  
16 Firstly, it is important to acknowledge the sample selection. As the sample was  
17  
18 restricted to non-standard employees (i.e., permanent, full-time, employees were  
19  
20 excluded), the lower end of the precariousness scale had a smaller proportion than  
21  
22 what would be expected if standard employees with longer duration and tenure  
23  
24 would have been included in the sample. This limitation is likely to have contributed  
25  
26 to the lack of correlation between the items. However, considering that the sample  
27  
28 was intentionally recruited in order to capture a population of precariously employed  
29  
30 individuals, the poor psychometric properties of temporariness also shows that these  
31  
32 items are not necessarily related in a meaningful way when measuring precariousness  
33  
34 among non-standard employees.  
35  
36  
37  
38  
39  
40  
41  
42

43 Secondly, in the current context, the Swedish legislation (the Employment  
44  
45 Protection Act SFS 1982:80) prevents an employer to hire an employee for more than  
46  
47 two years during a five-year period (consecutive or in shorter repeated contracts)  
48  
49 without having to employ (or dismiss) the employee in a permanent contract (46).  
50  
51 Thereby, an employee with an 18-month tenure might be more precarious than an  
52  
53 employee with a 6-month tenure as the latter has longer time left before being  
54  
55 forced in or out. Further, approximately 50% of temporary employees in Sweden has  
56  
57  
58  
59  
60

1  
2  
3 had repeated contracts with the same employer (37), which is an additional reasons  
4  
5 that could contribute to the lack of correlation between tenure and duration of  
6  
7 contract.  
8  
9

10  
11 Thirdly, we found that several participants were employed by the hour or on  
12  
13 demand while still indicating an indefinite contract length. This highlights the  
14  
15 difficulties in assessing temporariness only by contract duration (and tenure).  
16  
17 Temporariness is the dimension most likely to be dependent on context. Given the  
18  
19 proposed mechanism of temporariness leading to ill-health mediated via feelings of  
20  
21 insecurity, temporariness is most relevant in labour markets which do not offer  
22  
23 regulatory protection for certain groups of workers, such as permanent employees in  
24  
25 most European countries, which does not apply to the same extent in the USA (47).  
26  
27  
28  
29  
30  
31

32  
33 However tempting it would be suggest the inclusion of questions regarding  
34  
35 "contract type" in a future development of EPRES, the continuous flexibilization of the  
36  
37 labour market and fast changes in employment practices in combination with  
38  
39 contextual differences, makes it increasingly difficult – at least if international  
40  
41 comparison using similar scales is sought after.  
42  
43  
44  
45

46  
47 From a mechanistic standpoint and with an aspiration to develop a scale which  
48  
49 could be used in international comparison independent of context, we believe that an  
50  
51 item that measures the future employment opportunities with the current employer  
52  
53 as objectively as possible should be developed. EPRES-Se and other translations  
54  
55 could further be adapted, for example by combining the contract duration and  
56  
57 tenure-items with an item assessing the number of repeated contracts with the same  
58  
59  
60

1  
2  
3 employer or an item assessing how often during a specific time interval the  
4  
5 employment contract is up for renewal. Contract duration could also be  
6  
7  
8 complemented or replaced by a question more explicitly assessing the remaining  
9  
10  
11 duration of the contract at the time of answering the survey.  
12  
13  
14  
15

### 16 **'Wages'**

17  
18  
19 The income-item correlated moderately with the other items in the subscale (items  
20  
21 assessing how well the income covers basic needs and unforeseen expenses). Previous  
22  
23 studies report similar findings for this item (8-10). One explanation to these results is  
24  
25 the quantitative nature of the income-item as compared to the other items. Slightly  
26  
27 more than half, 57%, of the participants scored a precariousness level of 3 or 4 on  
28  
29 income, which is not surprising as the sample is constituted by young non-standard  
30  
31 employees. However, only 5% and 25% of the sample scored a precariousness level of  
32  
33 3 or 4 on the other two items respectively. How well one can cover basic needs and  
34  
35 unforeseen expenses could depend on more than income, such as family support.  
36  
37  
38 Approximately 24% of adults aged 20-27 years in Sweden still live at home. In the  
39  
40 majority of municipalities in large city regions, this figure is more than 50% in the  
41  
42 majority of municipalities in large city regions. About half of those living at home pay  
43  
44 nothing in rent (48). As 74% of the sample is between 18-29 years old, it is likely that  
45  
46 at least a part of the participants still live at home and receive help from their family.  
47  
48  
49 Including standard employees in the sample could potentially have increased the item-  
50  
51  
52  
53  
54  
55  
56  
57  
58  
59  
60

1  
2  
3 subscale correlation as we would expect a larger proportion of participants with a high  
4  
5  
6 income.

7  
8         Aside from the income-item, item-subscale correlations for the remaining two  
9  
10 items and subscale reliability were acceptable and only a fraction of the sample did not  
11  
12 provide an answer to the item on income (2.2%). Therefore, as in the other EPRES scales,  
13  
14 we believe the subscale can be used in its current form in future studies.  
15  
16  
17  
18  
19  
20  
21

## 22 **'Disempowerment'**

23  
24 The items in 'disempowerment' had acceptable item-subscale correlations and  
25  
26 reliability. However, some response options ("my working hours/salary was decided  
27  
28 within my working team" and "do not know") were hardly used at all in, indicating that  
29  
30 these options might not be appropriate for the current population in the Swedish  
31  
32 context. Further, the remaining response options were also inadequate from an  
33  
34 adaptational point of view. For example, the working hours/salary being in line with  
35  
36 collective bargaining agreements does not imply that the working hours/salary was not  
37  
38 set by the employer; these options are not mutually exclusive. In a revised EPRES-Se,  
39  
40 the disempowerment-items would benefit from revision and clarification. Combining  
41  
42 response options not mutually exclusive could be considered as one way of improving  
43  
44 the subscale, such as "my working hours are in accordance with Swedish law and the  
45  
46 collective agreement, decided by my employer" and "my working hours are not in  
47  
48 accordance with Swedish law and the collective agreement, decided by my employer".  
49  
50  
51  
52  
53  
54  
55  
56  
57  
58  
59  
60

## **'Rights'**

The new item assessing sickness benefit had an acceptable item-subscale correlation and factor loading, similar to the other item-subscale correlations and factor loadings in the subscale. Further, the subscale reliability was good. Taken together, these results point towards that the new item worked well in the subscale.

## **Strengths and limitations**

This study finds strength in the fact that it is the first study translating and adapting EPRES-2010 to the Swedish context, as well as the first study to assess the psychometric properties of the resulting EPRES-Se. In addition, this work provides context-specific recommendations for future research using EPRES-Se. This study is, however, not without limitations.

The main limitations is the sample. As this study lies within the frame of the PREMIS-project (43), the sample was restricted to employees with a non-standard employment. EPRES, however, is developed to measure precariousness independent of the type of employment (8). By only assessing the psychometric properties of the scale in a population of non-standard employees, the scale properties cannot be directly compared to similar studies as the heterogeneity of the sample is limited. A sample representative of the entire work force would have provided better insights as to how the scale behaves among Swedish employees. A next step which this study has provided strong grounds for.

Further, being a convenience sample limits the generalizability of the results.

1  
2  
3 However, as the weighted results confirmed the psychometric properties of the scale,  
4  
5  
6 we could expect similar results in a representative sample applying the same sample  
7  
8 restrictions.  
9

## 10 11 12 13 **Conclusion**

14  
15  
16 The study found that EPRES-Se worked well in the current context, with high global  
17  
18 reliability, endorsement of all response options (for all items) and few missing values.  
19  
20 The psychometric properties for five out of six subscales were satisfactory, considering  
21  
22 this being the first translation and adaptation. However, one subscale, 'temporariness',  
23  
24 worked poorly and would need revision before implementing the scale in further  
25  
26 research. As employment precariousness is an emergent determinant of health it is  
27  
28 important that PE can be properly measured. The EPRES-Se is an important step in this  
29  
30 direction. We therefore encourage others to continue working with EPRES-Se and to  
31  
32 validate it further in populations of both standard and non-standard employees. In  
33  
34 order to enable international comparisons and multinational studies, similar studies in  
35  
36 other European countries are also called for.  
37  
38  
39  
40  
41  
42  
43  
44  
45  
46  
47  
48  
49  
50  
51  
52  
53  
54  
55  
56  
57  
58  
59  
60

## STATEMENTS

**Author contributions:** The study was conceived by Theo Bodin (TB) and Gun Johansson (GJ). All authors, TB, GJ, Johanna Jonsson (JJ), Alejandra Vives (AV), Joan Benach (JB), Katarina Kjellberg (KK) and Jenny Selander (JS), contributed to the design of the study. TB translated and back-translated the EPRES, and AV supported the translation process and examined the back translation. JJ collected the data with support from TB and GJ. JJ and TB conducted the analyses. JJ wrote the draft(s) of the manuscript. All authors, TB, GJ, JJ, AV, JB, KK and JS reviewed the draft(s) and provided feedback on its content. All authors approved the contents of the final manuscript.

**Acknowledgements:** The authors are grateful to the PREMIS project members and reference group members who provided valuable input during the formative work of the study.

**Author statements:** All of the authors have read and approved of the contents of this manuscript and believes that the manuscript represents honest work. All of the authors have met the ICMJE requirements for authorship. We confirm that the current manuscript has not been published elsewhere and that is it not under consideration by any other journal. The manuscript or any of its content has not been presented at a conference.



1  
2  
3 **Conflict of interest:** The authors declare that there are no conflicts of interest.  
4  
5  
6  
7

8 **Funding:** This work was supported by grant 2015-00933 from The Swedish Research  
9  
10 Council for Health, Working Life and Welfare (FORTE). The funder had no role in study  
11  
12 design, data collection and analysis, decision to publish, or preparation of the  
13  
14 manuscript.  
15  
16  
17  
18

19  
20  
21 **Data sharing:** Deidentified participant data are from the PREMIS study whose  
22  
23 authors may be contacted at [johanna.jonsson@ki.se](mailto:johanna.jonsson@ki.se). Data cannot be made publicly  
24  
25 available for ethical and legal reasons, but could be made available to researchers  
26  
27 who meet the criteria for access to confidential data after approval from the Regional  
28  
29  
30  
31  
32  
33  
34  
35  
36  
37  
38  
39  
40  
41  
42  
43  
44  
45  
46  
47  
48  
49  
50  
51  
52  
53  
54  
55  
56  
57  
58  
59  
60  
Ethics Committee of Stockholm.

## REFERENCES

1. CSDH. Closing the gap in a generation: Health equity through action on the social determinants of health. Final Report of the Commission on Social Determinants of Health. Geneva: World Health Organization; 2008.
2. Benach J, Vives A, Amable M, et al. Precarious employment: understanding an emerging social determinant of health. *Annu Rev Public Health* 2014;35(1):229-53.
3. Benach J, Muntaner C, Solar O, et al. Employment, work, and health inequalities: a global perspective. Geneva: WHO; 2007.
4. Benach J, Muntaner C. Precarious employment and health: developing a research agenda. *J Epidemiol Community Health*. 2007;61(4):276-7.
5. Quinlan M, Mayhew C, Bohle P. The global expansion of precarious employment, work disorganization, and consequences for occupational health: placing the debate in a comparative historical context. *Int J Health Serv*. 2001;31(3):507-36.
6. Benach J, Vives A, Tarafa G, et al. What should we know about precarious employment and health in 2025? Framing the agenda for the next decade of research. *Int J Epidemiol*. 2016;45(1):232-8.
7. Howard J. Nonstandard work arrangements and worker health and safety. *Am J Ind Med* 2017;60(1):1-10.
8. Vives A, Amable M, Ferrer M, et al. The Employment Precariousness Scale (EPRES): psychometric properties of a new tool for epidemiological studies among waged and salaried workers. *Occup Environ Med*. 2010;67(8):548-55.
9. Vives-Vergara A, Gonzalez-Lopez F, Solar O, et al. Precarious employment in Chile: psychometric properties of the Chilean version of Employment Precariousness Scale in private sector workers. *Cad Saude Publica*. 2017;33(3):e00156215.
10. Vives A, Gonzalez F, Moncada S, et al. Measuring precarious employment in times of crisis: the revised Employment Precariousness Scale (EPRES) in Spain. *Gac Sanit*. 2015;29(5):379-82.

- 1  
2  
3 11. Vives A, Amable M, Ferrer M, et al. Employment precariousness and poor  
4 mental health: evidence from Spain on a new social determinant of health. *J Environ*  
5  
6  
7  
8  
9  
10 12. Benach J, Julià M, Tarafa G, et al. La precariedad laboral medida de forma  
11 multidimensional: distribución social y asociación con la salud en Cataluña  
12 [Multidimensional measurement of precarious employment: social distribution and its  
13 association with health in Catalonia (Spain)]. *Gac Sanit* 2015;29(5):375-78.  
14  
15  
16  
17 13. Arnold D, Bongiovi JR. Precarious, Informalizing, and Flexible Work:  
18 Transforming Concepts and Understandings. *Am Behav Sci* 2013;57(3):289-308.  
19  
20  
21 14. Broughton A, Green M, Rickard C, et al. Precarious employment in Europe.  
22 Strasbourg: European Parliament; 2016.  
23  
24  
25 15. Muntaner C. Digital Platforms, Gig Economy, Precarious Employment, and the  
26 Invisible Hand of Social Class. *Int J Health Serv* 2018;48(4):597-600.  
27  
28  
29 16. Vosko LF, Zukewich N, Cranford C. Precarious jobs: A new typology of  
30 employment. *Perspect labour income* 2003;15(4).  
31  
32  
33 17. Rodgers G, Rodgers J. Precarious jobs in labour market regulation: the growth  
34 of atypical employment in Western Europe: International Labour Organisation; 1989.  
35  
36  
37 18. Standing G. Global labour flexibility: Seeking distributive justice: Macmillan  
38 London; 1999.  
39  
40  
41 19. Julia M, Vanroelen C, Bosmans K, et al. Precarious Employment and Quality of  
42 Employment in Relation to Health and Well-being in Europe. *Int J Health Serv*  
43 2017;47(3):389-409.  
44  
45  
46  
47 20. Scott-Marshall H, Tompa E. The health consequences of precarious  
48 employment experiences. *Work*. 2011;38(4):369-82.  
49  
50  
51 21. International Labour Organization. From precarious work to decent work:  
52 Outcome document to the workers' symposium on policies and regulations to  
53 combat precarious employment. ILO Geneva; 2012.  
54  
55  
56  
57  
58  
59  
60

- 1  
2  
3 22. Julia M, Vives A, Tarafa G, et al. Changing the way we understand precarious  
4 employment and health: Precarisation affects the entire salaried population. *Safety*  
5 *Science*. 2017;100:66-73.  
6  
7
- 8  
9 23. Lewchuk W. Precarious jobs: Where are they, and how do they affect well-  
10 being? *Econ Labour Relat Rev* 2017;28(3):402-19.  
11  
12
- 13 24. Benach J, Julia M, Tarafa G, et al. Multidimensional measurement of precarious  
14 employment: social distribution and its association with health in Catalonia (Spain).  
15 *Gaceta Sanitaria*. 2015;29(5):375-78.  
16  
17
- 18 25. Kretsos L, Livanos I. The extent and determinants of precarious employment in  
19 Europe. *Int J Manpow*. 2016;37(1):25-43.  
20  
21
- 22 26. Tompa E, Scott-Marshall H, Dolinschi R, et al. Precarious employment  
23 experiences and their health consequences: towards a theoretical framework. *Work*.  
24 2007;28(3):209-24.  
25  
26
- 27 27. Rönnblad T, Grönholm E, Jonsson J, et al. Precarious employment and mental  
28 health: a systematic review and meta-analysis of longitudinal studies. *Scandinavian*  
29 *Journal of Work, Environment & Health*. 2019.  
30  
31
- 32 28. Koranyi I, Jonsson J, Ronnblad T, et al. Precarious employment and  
33 occupational accidents and injuries - a systematic review. *Scand J Work Environ*  
34 *Health*. 2018;44(4):341-50.  
35  
36
- 37 29. Kim TJ, von dem Knesebeck O. Perceived job insecurity, unemployment and  
38 depressive symptoms: a systematic review and meta-analysis of prospective  
39 observational studies. *Int Arch Occup Environ Health*. 2016;89(4):561-73.  
40  
41
- 42 30. Virtanen M, Nyberg ST, Batty GD, et al. Perceived job insecurity as a risk factor  
43 for incident coronary heart disease: systematic review and meta-analysis. *Bmj-British*  
44 *Medical Journal*. 2013;347.  
45  
46
- 47 31. Kivimäki M, Vahtera J, Virtanen M, et al. Temporary Employment and Risk of  
48 Overall and Cause-specific Mortality. *American Journal of Epidemiology*.  
49 2003;158(7):663-68.  
50  
51  
52  
53  
54  
55  
56  
57  
58  
59  
60

- 1  
2  
3 32. De Witte H, Pienaar J, De Cuyper N. Review of 30 years of longitudinal studies  
4 on the association between job insecurity and health and well-being: is there causal  
5 evidence? *Australian Psychologist*. 2016;51(1):18-31.  
6  
7  
8
- 9 33. Julia M, Vanroelen C, Bosmans K, et al. Precarious employment and quality of  
10 employment in relation to health and well-being in Europe. *International Journal of*  
11 *Health Services*. 2017;47(3):389-409.  
12  
13  
14
- 15 34. Vives A. A multidimensional approach to precarious employment:  
16 measurement, association with poor mental health and prevalence in the Spanish  
17 workforce: Universitat Pompeu Fabra; 2010.  
18  
19  
20
- 21 35. International Labour Organization. Non-standard employment around the  
22 world: Understanding challenges, shaping prospects. Geneva; 2016.  
23  
24
- 25 36. Alfnsson J. Nomaderna på den svenska arbetsmarknaden. Det otrygga livets  
26 framväxt och effekter på klasstrukturen [In Swedish]. 2018.  
27  
28
- 29 37. Statistics Sweden. Trends for persons in temporary employment [In Swedish].  
30 2015.  
31  
32
- 33 38. Eurofund. Non-standard forms of employment: recent trends and future  
34 prospects 2017b.  
35  
36
- 37 39. The Swedish Labour Policy Council (AER). Olika vägar till jobb [In Swedish].  
38 2018.  
39  
40
- 41 40. Pyoria P, Ojala S. Precarious work and intrinsic job quality: Evidence from  
42 Finland, 1984-2013. *Economic and Labour Relations Review*. 2016;27(3):349-67.  
43  
44
- 45 41. Salganik MJ, Heckathorn DD. Sampling and estimation in hidden populations  
46 using respondent-driven sampling. *Sociol methodol*. 2004;34(1):193-240.  
47  
48
- 49 42. Bengtsson L, Lu X, Nguyen QC, et al. Implementation of web-based  
50 respondent-driven sampling among men who have sex with men in Vietnam. *PLoS*  
51 *One*. 2012;7(11):e49417.  
52  
53  
54
- 55 43. Jonsson J, Stein ML, Johansson G, et al. A performance assessment of web-  
56 based respondent driven sampling among workers with precarious employment in  
57 Sweden. *PLoS One*. 2019;14(1):e0210183.  
58  
59  
60

- 1
- 2
- 3
- 4 44. Volz E, Heckathorn DD. Probability Based Estimation Theory for Respondent
- 5 Driven Sampling. *J Off Stat* 2008;24(1):79-97.
- 6
- 7 45. Statistics Sweden. Inkomstrapport 2016 - Hushåll och Individer [In Swedish].
- 8 2018.
- 9
- 10 46. Lagen (1982:80) om anställningsskydd (SFS 2017:363) [Internet].
- 11
- 12 47. OECD. Detailed description of employment protection legislation, 2012-2013.
- 13 OECD countries. 2013.
- 14
- 15 48. Hyresgästföreningen. Unga vuxnas boende [In Swedish]. 2018.
- 16
- 17
- 18
- 19
- 20
- 21
- 22
- 23
- 24
- 25
- 26
- 27
- 28
- 29
- 30
- 31
- 32
- 33
- 34
- 35
- 36
- 37
- 38
- 39
- 40
- 41
- 42
- 43
- 44
- 45
- 46
- 47
- 48
- 49
- 50
- 51
- 52
- 53
- 54
- 55
- 56
- 57
- 58
- 59
- 60

## SUPPLEMENTARY MATERIAL

### Supplementary material A. EPRES-Se

#### TEMPORALITET

##### 1. Hur länge gäller ditt nuvarande kontrakt?

Om du har flera arbetsgivare anger du den arbetsgivare du arbetar för flest timmar en genomsnittlig månad.

- Tillsvidare
- 2 år eller mer
- 1 år eller mer
- 6 månader eller mer
- 3 månader eller mer
- 1 månad eller mer
- Kortare än 1 månad
- Har inget kontrakt
- Vet ej

##### 2. Hur länge har du jobbat för samma arbetsgivare/uppdragsgivare?

Om du har flera arbetsgivare anger du den arbetsgivare du arbetar för flest timmar en genomsnittlig månad.

- Mindre än 1 månad
- 1 månad till mindre än 3 månader
- 3 månader till mindre än 6 månader
- 6 månader till mindre än 1 år
- 1 år till mindre än 2 år
- 2 år till mindre än 5 år
- 5 år eller mer

#### LÖN

##### 3. Ungefär hur mycket tjänar du per månad netto (efter skatt)?

Lägg ihop summan för din vita lön efter skatt + svart lön + eventuell dricks, en genomsnittlig månad.

- 3 000 kr eller mindre
- Mellan 3 001 och 6 000 kr
- Mellan 6 001 och 9 000 kr
- Mellan 9 001 och 12 000 kr
- Mellan 12 001 och 15 000 kr
- Mellan 15 001 och 18 000 kr
- Mellan 18 001 och 21 000 kr
- Mellan 21 001 och 24 000 kr
- Mellan 24 001 och 27 000 kr
- Mellan 27 001 och 30 000 kr
- Mer än 30 000 kr
- Inget svar

Hur ofta tillåter din nuvarande lön dig att...

- Alltid
- Ofta
- Ibland
- Sällan
- Aldrig

4. Täcka dina dagliga grundläggande behov?

5. Täcka oförutsedda utgifter av betydelse?

- Ibland
- Sällan
- Aldrig

## MAKTLÖSHET

### 6. Hur bestämdes arbetstiderna för ditt nuvarande arbete?

Välj det alternativ som stämmer bäst in på dig. Om du har flera arbetsgivare anger du den arbetsgivare du arbetar för flest timmar en genomsnittlig månad.

- De följer lag och kollektivavtalet
- De bestämdes av arbetsgivaren
- De var en överenskommelse mellan mig och min chef
- De var en överenskommelse i mitt arbetslag
- Vet ej
- Ej relevant, arbetar uppdragsbaserat

### 7. Hur bestämdes lönen för ditt nuvarande arbete?

Välj det alternativ som stämmer bäst in på dig. Om du har flera arbetsgivare anger du den arbetsgivare du arbetar för flest timmar en genomsnittlig månad.

- Den följer kollektivavtalet
- Den bestämdes av arbetsgivaren
- Den var en överenskommelse mellan mig och min chef
- Den var en överenskommelse i mitt arbetslag
- Vet ej

## SÅRBARHET

### Ange hur ofta hos din arbetsgivare som...

Om du har flera arbetsgivare anger du den arbetsgivare du arbetar för flest timmar en genomsnittlig månad.

Var god besvara alla frågor.

### 8. Du är rädd för att kräva bättre arbetsvillkor

- Alltid
- Ofta

### 9. Du är försvarslös mot orättvis behandling från överordnande

- Ibland
- Sällan

### 10. Du är rädd för att få sparken om du inte gör allt arbetsgivaren ber om

- Aldrig

### 11. Du blir behandlad auktoritärt

### 12. De får dig att känna dig lätt utbytbar

## RÄTTIGHETER

### Har du rätt till något av följande?

Var god besvara alla frågor.



1  
2  
3 **13. Föräldraledighet**

- Ja

4  
5 **14. Ålderspension**

- Nej

- Vet ej

6  
7 **15. A-kassa**

8  
9 **16. Avgångsvederlag vid uppsägning**

10  
11 **17. Sjukersättning/sjukpenning**

## 12 13 14 15 **UTÖVANDE AV RÄTTIGHETER**

16  
17  
18 **Hur ofta i den organisation där du arbetar kan du utöva**  
19 **följande rättigheter?**

20 Om du har flera arbetsgivare anger du den arbetsgivare du  
21 arbetar för flest timmar en genomsnittlig månad.

22  
23 Var god besvara alla frågor.

24  
25  
26 **18. Ta helg/veckovila utan problem**

- Alltid

- Ofta

27  
28 **19. Ta semesterdagar utan problem**

- Ibland

- Sällan

29  
30 **20. Ta en ledig dag av familjeskäl utan problem (vård av**  
31 **sjukt barn, vård av sjuk anhörig etc.)**

- Aldrig

32  
33 **21. Ta en ledig dag av personliga skäl utan problem**

34  
35 **22. Sjukskriva dig utan problem**

36  
37 **23. Gå till läkare när du behöver**

## Supplementary material B. English translation of EPRES-Se with coding

### TEMPORARINESS

Coding

|                                                                                                                       |                          |   |
|-----------------------------------------------------------------------------------------------------------------------|--------------------------|---|
| <b>1. How long is your current employment contract valid?</b>                                                         | - Indefinitely           | 0 |
|                                                                                                                       | - 2 years or more        | 1 |
| If you have more than one employer, please indicate the employer you work the most hours for during an average month. | - 1 year or more         | 1 |
|                                                                                                                       | - 6 months or more       | 2 |
|                                                                                                                       | - 3 months or more       | 3 |
|                                                                                                                       | - 1 month or more        | 3 |
|                                                                                                                       | - Less than 1 month      | 3 |
|                                                                                                                       | - Do not have a contract | 4 |
|                                                                                                                       | - Do not know            | 4 |

|                                                                                                                       |                                  |   |
|-----------------------------------------------------------------------------------------------------------------------|----------------------------------|---|
| <b>2. How long have you been working for the same employer?</b>                                                       | - Less than 1 month              | 4 |
|                                                                                                                       | - 1 month to less than 3 months  | 3 |
| If you have more than one employer, please indicate the employer you work the most hours for during an average month. | - 3 months to less than 6 months | 3 |
|                                                                                                                       | - 6 months to less than 1 year   | 2 |
|                                                                                                                       | - 1 year to less than 2 years    | 2 |
|                                                                                                                       | - 2 years to less than 5 years   | 1 |
|                                                                                                                       | - 5 years or more                | 0 |

### WAGES

|                                                                                                                    |                                 |   |
|--------------------------------------------------------------------------------------------------------------------|---------------------------------|---|
| <b>3. Approximately how much do you earn per month after taxes?</b>                                                | - 3000 SEK or less              | 4 |
|                                                                                                                    | - Between 3001 and 6000 SEK     | 4 |
| Add the amount for your salary after tax deductions + salary for illicit work + any tips, during an average month. | - Between 6001 and 9000 SEK     | 3 |
|                                                                                                                    | - Between 9001 and 12 000 SEK   | 3 |
|                                                                                                                    | - Between 12 001 and 15 000 SEK | 2 |
|                                                                                                                    | - Between 15 001 and 18 000 SEK | 2 |
|                                                                                                                    | - Between 18 001 and 21 000 SEK | 1 |
|                                                                                                                    | - Between 21 001 and 24 000 SEK | 1 |
|                                                                                                                    | - Between 24 001 and 27 000 SEK | 0 |
|                                                                                                                    | - Between 27 001 and 30 000 SEK | 0 |
|                                                                                                                    | - More than 30 000 SEK          | 0 |
|                                                                                                                    | - No answer                     | - |

|                                                           |             |   |
|-----------------------------------------------------------|-------------|---|
| <b>How often does your current salary allow you to...</b> | - Always    | 0 |
|                                                           | - Often     | 1 |
| <b>4. Cover you daily basic needs?</b>                    | - Sometimes | 2 |
| <b>5. Cover unforeseen expenses of significance?</b>      | - Rarely    | 3 |
|                                                           | - Never     | 4 |

## DISEMPOWERMENT

### 6. How were your working hours settled for your current job?

Indicate the alternative that fits you best. If you have more than one employer, please indicate the employer you work the most hours for during an average month.

- My working hours are in accordance with Swedish law and the collective agreement 0
- My employer decided my working hours 3
- My working hours are the result of an agreement between me and my manager 2
- My working hours are the result of an agreement within my work team 1
- Do not know 4
- Not applicable. I work project-based 2

### 7. How was the salary settled for your current job?

Indicate the alternative that fits you best. If you have more than one employer, please indicate the employer you work the most hours for during an average month.

- My salary is accordance with the collective agreement 0
- My salary was set by my employer 3
- My salary is the result of an agreement between me and my manager 2
- My salary is the result of an agreement in my work team 1
- Do not know 4

## VULNERABILITY

### Indicate how often, at your employer...

If you have more than one employer, please indicate the employer you work the most hours for during an average month.

Please indicate an answer to all of the questions.

### 8. You feel afraid to demand better working conditions

- Always 4
- Often 3
- Sometimes 2

### 9. You are defenceless towards unfair treatment by your superiors

- Rarely 1
- Never 0

### 10. You feel afraid of being fired if you do not comply with everything your employer asks of you

### 11. You are treated in an authoritarian manner

1  
2  
3 **12. You are made to feel easily replaceable**  
4  
5

6 **RIGHTS**  
7

8  
9 **Do you have the right to any of the following?**

10 Please indicate an answer to all of the questions.  
11

|    |                                                      |               |   |
|----|------------------------------------------------------|---------------|---|
| 12 |                                                      |               |   |
| 13 | <b>13. Parental leave</b>                            | - Yes         | 0 |
| 14 |                                                      | - No          | 1 |
| 15 | <b>14. Retirement due to old age</b>                 | - Do not know | 2 |
| 16 |                                                      |               |   |
| 17 | <b>15. Unemployment insurance fund (A-kassa)</b>     |               |   |
| 18 |                                                      |               |   |
| 19 | <b>16. Severance pay in the event of termination</b> |               |   |
| 20 |                                                      |               |   |
| 21 | <b>17. Sickness benefit</b>                          |               |   |
| 22 |                                                      |               |   |
| 23 |                                                      |               |   |

24 **EXERCISE OF RIGHTS**  
25

26  
27  
28 **How often, in the organisation where you work, are**  
29 **you able to exercise the following rights?**

30 If you have more than one employer, please indicate the  
31 employer you work the most hours for during an average  
32 month.  
33

34 Please indicate an answer to all of the questions.  
35

|    |                                                               |             |   |
|----|---------------------------------------------------------------|-------------|---|
| 36 | <b>18. Take the weekend off/ weekly rest without</b>          | - Always    | 0 |
| 37 | <b>problem</b>                                                | - Often     | 1 |
| 38 | <b>19. Take vacation days without problem</b>                 | - Sometimes | 2 |
| 39 |                                                               | - Rarely    | 3 |
| 40 | <b>20. Take a day off for family reasons without</b>          | - Never     | 4 |
| 41 | <b>problem (care of a sick child, care of a sick relative</b> |             |   |
| 42 | <b>etc.)</b>                                                  |             |   |
| 43 |                                                               |             |   |
| 44 | <b>21. Take a day off for personal reasons without</b>        |             |   |
| 45 | <b>problem</b>                                                |             |   |
| 46 |                                                               |             |   |
| 47 | <b>22. Go on sick leave without problem</b>                   |             |   |
| 48 |                                                               |             |   |
| 49 | <b>23. Go to the doctor when needed</b>                       |             |   |
| 50 |                                                               |             |   |
| 51 |                                                               |             |   |

## Supplementary material C. Comparison of subscale means for recoding of participants with an indefinite contract and on demand/by the hour employment

### Crosstabulation of type of employment and contractual length

Table showing crosstabulation of type of employment and contractual length (EPRES-Se item 1)

| Contractual length       | Type of employment   |                                |                                                | Total |
|--------------------------|----------------------|--------------------------------|------------------------------------------------|-------|
|                          | Temporary employment | Employed on demand/by the hour | Self-employed (involuntary), intern, part-time |       |
| Indefinitely             | 16 <sup>a</sup>      | 139 <sup>b</sup>               | 20 <sup>a</sup>                                | 175   |
| 2 years or more          | 3                    | 3                              | 1                                              | 7     |
| 1 year or more           | 9                    | 7                              | 1                                              | 17    |
| 6 months or more         | 34                   | 32                             | 9                                              | 75    |
| 3 months or more         | 24                   | 19                             | 6                                              | 49    |
| 1 month or more          | 16                   | 6                              | 2                                              | 24    |
| Less than 1 month        | 11                   | 5                              | 0                                              | 16    |
| I do not have a contract | 2                    | 21                             | 12                                             | 35    |
| Do not know              | 6                    | 11                             | 0                                              | 17    |
| <b>Total</b>             | 121                  | 243                            | 51                                             | 415   |

<sup>a</sup> Used in comparison 2

<sup>b</sup> Used in comparison 1

## 1. Comparison of subscale means for employees with an indefinite contractual length and on demand/by the hour employment

Table showing subscale averages for employees with an indefinite contractual length and an on demand/by the hour employment

| Subscale           | N   | Minimum | Maximum | Mean | Std. Deviation |
|--------------------|-----|---------|---------|------|----------------|
| Wages              | 135 | 0.00    | 3.67    | 1.76 | 0.72           |
| Disempowerment     | 139 | 0.00    | 4.00    | 2.21 | 0.97           |
| Vulnerability      | 137 | 0.00    | 4.00    | 1.35 | 0.94           |
| Rights             | 136 | 0.00    | 4.00    | 2.35 | 1.06           |
| Exercise of rights | 136 | 0.00    | 3.50    | 1.74 | 0.71           |
| Valid N            | 134 |         |         |      |                |

Table showing least sum of squares-differences between subscale averages for employees with an on demand/by the hour employment, comparing employees with an indefinite contractual length vs. employees with any other contractual length

| EPRES-Se item 1. How long is your current employment valid? |       |       |       |       |       |              |             |              |
|-------------------------------------------------------------|-------|-------|-------|-------|-------|--------------|-------------|--------------|
| Subscale                                                    | 2 y   | 1y    | 6m    | 3m    | 1m    | <1m          | No contract | I don't know |
| Wages                                                       | 0.014 | 0.652 | 0.320 | 0,100 | 0.348 | 0.096        | 0.142       | 0.025        |
| Disempowerment                                              | 0.379 | 0.284 | 0.072 | 0.367 | 0.295 | 0.212        | 0.165       | 0.151        |
| Vulnerability                                               | 1.216 | 0.092 | 0.320 | 0,004 | 0.518 | 0.251        | 0.461       | 0.658        |
| Rights                                                      | 2.086 | 0.467 | 0.053 | 0,659 | 0.180 | 0.113        | 0.123       | 0.338        |
| Exercise of rights                                          | 0.185 | 0.764 | 0.135 | 0,191 | 0.315 | 0.040        | 0.046       | 0.558        |
| Sum                                                         | 3.880 | 2.258 | 0.899 | 1.320 | 1.657 | <b>0.713</b> | 0.936       | 1.731        |

## 2. Comparison of subscale means for employees with an indefinite contractual length and any other type of employment (excluding on demand/by the hour)

Table showing subscale averages for employees with an indefinite contract length and any other type of employment

| Subscale           | N  | Minimum | Maximum | Mean  | Std. Deviation |
|--------------------|----|---------|---------|-------|----------------|
| Wages              | 35 | 0.33    | 4.00    | 1.819 | 0.919          |
| Disempowerment     | 36 | 0.00    | 4.00    | 2.167 | 1.095          |
| Vulnerability      | 36 | 0.00    | 4.00    | 1.167 | 0.966          |
| Rights             | 36 | 0.00    | 4.00    | 2.356 | 1.182          |
| Exercise of rights | 36 | 0.00    | 4.00    | 1.690 | 0.876          |
| Valid N            | 35 |         |         |       |                |

Table showing least sum of squares-differences between subscale averages for employees with any other employment (excluding on demand/by the hour employees), comparing employees with an indefinite contractual length vs. employees with any other contractual length

| EPRES-Se item 1. How long is your current employment valid? |       |       |       |       |       |       |             |              |
|-------------------------------------------------------------|-------|-------|-------|-------|-------|-------|-------------|--------------|
| Subscale                                                    | 2 y   | 1y    | 6m    | 3m    | 1m    | <1m   | No contract | I don't know |
| Wages                                                       | 1.402 | 0.486 | 0.510 | 0.624 | 0.504 | 0.819 | 0.264       | 0.459        |
| Disempowerment                                              | 0.541 | 0.216 | 0.190 | 0.083 | 0.083 | 0.121 | 0.190       | 0.000        |
| Vulnerability                                               | 0.533 | 0.233 | 0.517 | 0.667 | 0.500 | 0.258 | 0.276       | 0.633        |
| Rights                                                      | 1.456 | 0.836 | 0.132 | 0.276 | 0.378 | 0.792 | 0.298       | 0.422        |
| Exercise of rights                                          | 0.357 | 0.957 | 0.252 | 0.179 | 0.227 | 0.311 | 0.404       | 0.032        |
| Sum                                                         | 4.289 | 2.727 | 1.601 | 1.828 | 1.692 | 2.301 | 1.433       | 1.547        |

**Supplementary material D. Weighted results, table 1-4****Table 1. Weighted demographic characteristics of the study population (percentages), N=415**

|                   |                                  | %   |
|-------------------|----------------------------------|-----|
| <b>Age</b>        | 18-24                            | 34% |
|                   | 25-29                            | 43% |
|                   | 30-64                            | 23% |
| <b>Sex</b>        | Male                             | 50% |
|                   | Female                           | 50% |
| <b>Employment</b> | Temporary employment             | 21% |
|                   | Employed on demand/by the hour   | 64% |
|                   | Self-employed (involuntary)      | 3%  |
|                   | Intern                           | 1%  |
|                   | Part-time employed (involuntary) | 10% |



1  
2  
3  
4  
5  
6  
7  
8  
9  
10  
11  
12  
13  
14  
15  
16  
17  
18  
19  
20  
21  
22  
23  
24  
25  
26  
27  
28  
29  
30  
31  
32  
33  
34  
35  
36  
37  
38  
39  
40  
41  
42  
43  
44  
45  
46

**Table 2. Weighted item descriptive statistics and Pearson item-subscale correlations of EPRES-Se**

| Item                              | Missing % <sup>1</sup> | Mean | SD <sup>2</sup> | Response frequency <sup>3</sup> |      |      |      |      | Pearson item subscale correlations <sup>4</sup> |             |             |             |             |             |
|-----------------------------------|------------------------|------|-----------------|---------------------------------|------|------|------|------|-------------------------------------------------|-------------|-------------|-------------|-------------|-------------|
|                                   |                        |      |                 | 0                               | 1    | 2    | 3    | 4    | T                                               | W           | D           | V           | R           | ER          |
| <b>Temporariness</b>              |                        |      |                 |                                 |      |      |      |      |                                                 |             |             |             |             |             |
| Length of contract <sup>5</sup>   | 0.0                    | 2.5  | 1.1             | 9.5                             | 5.8  | 17.9 | 56.0 | 10.9 | <b>-0.05</b>                                    | 0.02        | -0.03       | 0.06        | 0.06        | 0.05        |
| Time working empl. <sup>5</sup>   | 0.0                    | 2.1  | 0.9             | 2.8                             | 22.1 | 43.8 | 27.8 | 3.5  | <b>-0.05</b>                                    | 0.15        | 0.17        | 0.05        | 0.36        | 0.21        |
| <b>Wages</b>                      |                        |      |                 |                                 |      |      |      |      |                                                 |             |             |             |             |             |
| Income monthly                    | 3.5                    | 2.6  | 1.0             | 6.9                             | 6.6  | 23.3 | 47.0 | 16.1 | 0.13                                            | <b>0.40</b> | 0.04        | 0.01        | 0.27        | 0.23        |
| Cover basic need                  | 1.2                    | 0.8  | 0.9             | 40.2                            | 44.2 | 11.4 | 2.5  | 1.7  | 0.01                                            | <b>0.61</b> | 0.03        | 0.27        | 0.13        | 0.28        |
| Cover unforeseen expen.           | 1.2                    | 1.8  | 1.1             | 13.3                            | 28.7 | 34.3 | 15.6 | 8.1  | 0.13                                            | <b>0.57</b> | 0.08        | 0.42        | 0.17        | 0.22        |
| <b>Disempowerment</b>             |                        |      |                 |                                 |      |      |      |      |                                                 |             |             |             |             |             |
| Working hour settled <sup>5</sup> | 0.0                    | 2.2  | 1.2             | 18.7                            | 0.7  | 31.3 | 42.7 | 6.5  | 0.06                                            | 0.13        | <b>0.33</b> | 0.08        | 0.20        | 0.16        |
| Salary settled <sup>5</sup>       | 0.0                    | 2.2  | 1.2             | 19.3                            | 2.1  | 19.3 | 54.1 | 5.2  | 0.07                                            | -0.03       | <b>0.33</b> | 0.00        | 0.10        | 0.11        |
| <b>Vulnerability</b>              |                        |      |                 |                                 |      |      |      |      |                                                 |             |             |             |             |             |
| Demand work cond.                 | 1.2                    | 1.4  | 1.1             | 21.8                            | 33.0 | 28.4 | 11.4 | 5.4  | 0.04                                            | 0.20        | 0.09        | <b>0.76</b> | 0.09        | 0.25        |
| Unfair treatment                  | 1.2                    | 1.2  | 1.1             | 28.5                            | 39.2 | 18.4 | 9.9  | 4.0  | 0.04                                            | 0.20        | 0.08        | <b>0.80</b> | 0.10        | 0.26        |
| Afraid fired                      | 1.2                    | 1.4  | 1.2             | 28.4                            | 30.9 | 21.4 | 13.3 | 6.0  | 0.09                                            | 0.31        | 0.10        | <b>0.79</b> | 0.17        | 0.38        |
| Treated authoritarian             | 1.2                    | 1.2  | 1.1             | 28.4                            | 38.1 | 19.1 | 9.9  | 4.5  | 0.03                                            | 0.21        | -0.04       | <b>0.64</b> | 0.12        | 0.23        |
| Easily replaced                   | 1.2                    | 1.6  | 1.2             | 21.6                            | 33.2 | 22.7 | 11.5 | 11.1 | 0.13                                            | 0.30        | -0.02       | <b>0.74</b> | 0.15        | 0.24        |
| <b>Rights</b>                     |                        |      |                 |                                 |      |      |      |      |                                                 |             |             |             |             |             |
| Right parental leave              | 1.2                    | 1.2  | 0.8             | 23.0                            | 33.7 | 43.3 |      |      | 0.19                                            | 0.20        | 0.22        | 0.12        | <b>0.59</b> | 0.22        |
| Right retirement                  | 1.2                    | 1.2  | 0.8             | 24.4                            | 29.8 | 45.8 |      |      | 0.29                                            | 0.20        | 0.23        | 0.17        | <b>0.59</b> | 0.28        |
| Right unemployment                | 1.2                    | 1.0  | 0.9             | 36.7                            | 24.7 | 38.6 |      |      | 0.13                                            | 0.17        | 0.05        | 0.07        | <b>0.60</b> | 0.12        |
| Right severance pay               | 1.2                    | 1.3  | 0.6             | 6.0                             | 53.2 | 40.8 |      |      | 0.14                                            | <b>0.11</b> | 0.04        | 0.05        | <b>0.50</b> | 0.05        |
| Right sickness benefits           | 1.2                    | 1.0  | 0.9             | 38.7                            | 26.8 | 34.5 |      |      | 0.28                                            | 0.15        | 0.10        | 0.13        | <b>0.53</b> | 0.15        |
| <b>Exercise of rights</b>         |                        |      |                 |                                 |      |      |      |      |                                                 |             |             |             |             |             |
| Take weekend off                  | 1.2                    | 1.7  | 1.1             | 19.9                            | 17.4 | 44.6 | 11.5 | 6.5  | 0.07                                            | 0.23        | 0.14        | 0.21        | 0.13        | <b>0.67</b> |
| Take vacation                     | 1.2                    | 1.9  | 1.0             | 12.3                            | 20.1 | 43.4 | 18.3 | 6.0  | 0.15                                            | 0.25        | 0.18        | 0.27        | 0.19        | <b>0.71</b> |
| Take day off                      | 1.2                    | 1.7  | 1.1             | 21.4                            | 17.8 | 41.4 | 13.6 | 5.8  | 0.18                                            | 0.22        | 0.19        | 0.25        | 0.20        | <b>0.77</b> |
| Take day off, pers.               | 1.2                    | 1.9  | 1.1             | 13.7                            | 19.1 | 41.8 | 16.4 | 9.0  | 0.12                                            | 0.23        | 0.05        | 0.37        | 0.19        | <b>0.71</b> |
| Sick leave                        | 1.2                    | 1.6  | 1.1             | 21.7                            | 19.1 | 42.9 | 12.1 | 4.1  | 0.11                                            | 0.22        | 0.15        | 0.23        | 0.19        | <b>0.70</b> |
| Go to doctor                      | 1.2                    | 1.2  | 1.1             | 34.3                            | 27.1 | 28.2 | 7.2  | 3.2  | 0.19                                            | 0.28        | 0.07        | 0.24        | 0.19        | <b>0.67</b> |

<sup>1</sup> Proportion of participants with any missing item; <sup>2</sup> SD=Standard Deviation; <sup>3</sup> Frequency (%) of participants indicating the specific response. 0 indicates the lowest precariousness score, 4 indicating the highest precariousness score. <sup>4</sup> Corrected for overlap, i.e., item is removed from the corresponding subscale. T=Temporariness; W=Wages; D=Disempowerment ;V=Vulnerability; R=Rights; ER=Exercise rights. <sup>5</sup> Inter-item correlations

**Table 3. Weighted scale descriptive statistics: range, mean, standard deviation (SD), floor and ceiling effects and Cronbach's alpha coefficient**

| Subscale           | Items | Mean | SD  | Missing (%) <sup>1</sup> | Obs. range | Floor % <sup>2</sup> | Ceiling % <sup>2</sup> | Cronbach's alpha |
|--------------------|-------|------|-----|--------------------------|------------|----------------------|------------------------|------------------|
| Temporariness      | 2     | 2.3  | 0.7 | 0.0                      | 0-4        | 0.3                  | 1.3                    | -0.10            |
| Wages              | 3     | 1.7  | 0.8 | 4.7                      | 0-4        | 3.0                  | 1.0                    | 0.70             |
| Disempowerment     | 2     | 2.2  | 1.0 | 0.0                      | 0-4        | 8.7                  | 2.4                    | 0.50             |
| Vulnerability      | 5     | 1.4  | 1.0 | 1.2                      | 0-4        | 14.3                 | 2.0                    | 0.90             |
| Rights             | 5     | 2.3  | 1.1 | 1.3                      | 0-4        | 3.8                  | 17.9                   | 0.78             |
| Exercise of rights | 6     | 1.6  | 0.9 | 1.3                      | 0-4        | 7.3                  | 1.0                    | 0.89             |
| EPRES-se           | 23    | 1.9  | 0.5 | 4.8                      | 0.09-3.07  | 0.2                  | 0.7                    | 0.84             |

<sup>1</sup> Proportion of participants with any missing item

<sup>2</sup> Proportion of participants with lowest (floor) and highest (ceiling) EPRES-Se scores

**Table 4. Weighted factor loadings from exploratory factor analysis of the EPRES-Se**

|                         | Factor          |               |             |             |                |               |
|-------------------------|-----------------|---------------|-------------|-------------|----------------|---------------|
|                         | Exercise rights | Vulnerability | Rights      | Wages       | Disempowerment | Temporariness |
| <b>Temporariness</b>    |                 |               |             |             |                |               |
| Length of contract      |                 |               |             |             |                | <b>-0.21</b>  |
| Time working empl.      | 0.17            |               | 0.37        |             | 0.14           | <b>-0.36</b>  |
| <b>Wages</b>            |                 |               |             |             |                |               |
| Income monthly          | 0.20            | -0.11         | 0.24        | <b>0.49</b> |                | -0.25         |
| Cover basic need        | 0.20            | 0.19          |             | <b>0.66</b> |                |               |
| Cover unforeseen expen. |                 | 0.35          |             | <b>0.84</b> |                | 0.19          |
| <b>Disempowerment</b>   |                 |               |             |             |                |               |
| Working hour settled    |                 |               | 0.14        |             | <b>0.43</b>    |               |
| Salary settled          |                 |               |             |             | <b>0.69</b>    | 0.15          |
| <b>Vulnerability</b>    |                 |               |             |             |                |               |
| Demand work cond.       | 0.11            | <b>0.81</b>   |             |             |                |               |
| Unfair treatment        |                 | <b>0.86</b>   |             |             |                |               |
| Afraid fired            | 0.24            | <b>0.80</b>   |             | 0.12        | 0.13           | -0.12         |
| Treated authoritarian   | 0.11            | <b>0.67</b>   |             |             | -0.14          |               |
| Easily replaced         |                 | <b>0.76</b>   |             | 0.17        |                |               |
| <b>Rights</b>           |                 |               |             |             |                |               |
| Right parental leave    | 0.15            |               | <b>0.69</b> |             | 0.19           |               |
| Right retirement        | 0.17            |               | <b>0.68</b> |             | 0.24           | -0.13         |
| Right unemployment      |                 |               | <b>0.70</b> |             |                | -0.17         |
| Right severance pay     |                 |               | <b>0.56</b> |             |                |               |
| Right sickness benefits |                 |               | <b>0.60</b> |             |                | 0.14          |
| <b>Exercise rights</b>  |                 |               |             |             |                |               |
| Take weekend off        | <b>0.69</b>     |               |             | 0.11        |                | -0.11         |
| Take vacation           | <b>0.74</b>     | 0.12          |             |             | 0.10           |               |
| Take day off            | <b>0.82</b>     | 0.10          |             |             |                | 0.14          |
| Take day off, pers.     | <b>0.73</b>     | 0.25          |             |             | -0.10          | 0.10          |
| Sick leave              | <b>0.74</b>     |               |             |             | 0.15           | -0.16         |
| Go to doctor            | <b>0.69</b>     |               | 0.11        | 0.15        |                |               |

Table showing factor loadings &gt;0.1

The weighted exploratory factor analysis extracted six factor with eigenvalues >1 (eigenvalues: 5.6; 3.0; 2.5; 1.5; 1.4; 1.1). These factors were the same as in EPRES-2010, thereby confirming the EPRES-2010 scale structure. Together, the six factor explained 65.4% of the variance.

1  
2  
3  
4  
5  
6  
7  
8  
9  
10  
11  
12  
13  
14  
15  
16  
17  
18  
19  
20  
21  
22  
23  
24  
25  
26  
27  
28  
29  
30  
31  
32  
33  
34  
35  
36  
37  
38  
39  
40  
41  
42  
43  
44  
45  
46  
47  
48  
49  
50  
51  
52  
53  
54  
55  
56  
57  
58  
59  
60

For peer review only

1  
2  
3  
4  
5  
6  
7  
8  
9  
10  
11  
12  
13  
14  
15  
16  
17  
18  
19  
20  
21  
22  
23  
24  
25  
26  
27  
28  
29  
30  
31  
32  
33  
34  
35  
36  
37  
38  
39  
40  
41  
42  
43  
44  
45  
46  
47  
48  
49  
50  
51  
52  
53  
54  
55  
56  
57  
58  
59  
60STROBE Statement—Checklist of items that should be included in reports of *cross-sectional studies*

|                              | <b>Item No</b> | <b>Recommendation</b>                                                                                                                                                                                                                                                                                                                                                                                         |
|------------------------------|----------------|---------------------------------------------------------------------------------------------------------------------------------------------------------------------------------------------------------------------------------------------------------------------------------------------------------------------------------------------------------------------------------------------------------------|
| <b>Title and abstract</b>    | 1              | (a) Indicate the study's design with a commonly used term in the title or the abstract<br>(b) Provide in the abstract an informative and balanced summary of what was done and what was found                                                                                                                                                                                                                 |
| <b>Introduction</b>          |                |                                                                                                                                                                                                                                                                                                                                                                                                               |
| Background/rationale         | 2              | Explain the scientific background and rationale for the investigation being reported                                                                                                                                                                                                                                                                                                                          |
| Objectives                   | 3              | State specific objectives, including any prespecified hypotheses                                                                                                                                                                                                                                                                                                                                              |
| <b>Methods</b>               |                |                                                                                                                                                                                                                                                                                                                                                                                                               |
| Study design                 | 4              | Present key elements of study design early in the paper                                                                                                                                                                                                                                                                                                                                                       |
| Setting                      | 5              | Describe the setting, locations, and relevant dates, including periods of recruitment, exposure, follow-up, and data collection                                                                                                                                                                                                                                                                               |
| Participants                 | 6              | (a) Give the eligibility criteria, and the sources and methods of selection of participants                                                                                                                                                                                                                                                                                                                   |
| Variables                    | 7              | Clearly define all outcomes, exposures, predictors, potential confounders, and effect modifiers. Give diagnostic criteria, if applicable                                                                                                                                                                                                                                                                      |
| Data sources/<br>measurement | 8*             | For each variable of interest, give sources of data and details of methods of assessment (measurement). Describe comparability of assessment methods if there is more than one group                                                                                                                                                                                                                          |
| Bias                         | 9              | Describe any efforts to address potential sources of bias                                                                                                                                                                                                                                                                                                                                                     |
| Study size                   | 10             | Explain how the study size was arrived at                                                                                                                                                                                                                                                                                                                                                                     |
| Quantitative variables       | 11             | Explain how quantitative variables were handled in the analyses. If applicable, describe which groupings were chosen and why                                                                                                                                                                                                                                                                                  |
| Statistical methods          | 12             | (a) Describe all statistical methods, including those used to control for confounding<br>(b) Describe any methods used to examine subgroups and interactions<br>(c) Explain how missing data were addressed<br>(d) If applicable, describe analytical methods taking account of sampling strategy<br>(e) Describe any sensitivity analyses                                                                    |
| <b>Results</b>               |                |                                                                                                                                                                                                                                                                                                                                                                                                               |
| Participants                 | 13*            | (a) Report numbers of individuals at each stage of study—eg numbers potentially eligible, examined for eligibility, confirmed eligible, included in the study, completing follow-up, and analysed<br>(b) Give reasons for non-participation at each stage<br>(c) Consider use of a flow diagram                                                                                                               |
| Descriptive data             | 14*            | (a) Give characteristics of study participants (eg demographic, clinical, social) and information on exposures and potential confounders<br>(b) Indicate number of participants with missing data for each variable of interest                                                                                                                                                                               |
| Outcome data                 | 15*            | Report numbers of outcome events or summary measures                                                                                                                                                                                                                                                                                                                                                          |
| Main results                 | 16             | (a) Give unadjusted estimates and, if applicable, confounder-adjusted estimates and their precision (eg, 95% confidence interval). Make clear which confounders were adjusted for and why they were included<br>(b) Report category boundaries when continuous variables were categorized<br>(c) If relevant, consider translating estimates of relative risk into absolute risk for a meaningful time period |
| Other analyses               | 17             | Report other analyses done—eg analyses of subgroups and interactions, and sensitivity analyses                                                                                                                                                                                                                                                                                                                |

| <b>Discussion</b>        |    |                                                                                                                                                                            |
|--------------------------|----|----------------------------------------------------------------------------------------------------------------------------------------------------------------------------|
| Key results              | 18 | Summarise key results with reference to study objectives                                                                                                                   |
| Limitations              | 19 | Discuss limitations of the study, taking into account sources of potential bias or imprecision. Discuss both direction and magnitude of any potential bias                 |
| Interpretation           | 20 | Give a cautious overall interpretation of results considering objectives, limitations, multiplicity of analyses, results from similar studies, and other relevant evidence |
| Generalisability         | 21 | Discuss the generalisability (external validity) of the study results                                                                                                      |
| <b>Other information</b> |    |                                                                                                                                                                            |
| Funding                  | 22 | Give the source of funding and the role of the funders for the present study and, if applicable, for the original study on which the present article is based              |

\*Give information separately for exposed and unexposed groups.

**Note:** An Explanation and Elaboration article discusses each checklist item and gives methodological background and published examples of transparent reporting. The STROBE checklist is best used in conjunction with this article (freely available on the Web sites of PLoS Medicine at <http://www.plosmedicine.org/>, Annals of Internal Medicine at <http://www.annals.org/>, and Epidemiology at <http://www.epidem.com/>). Information on the STROBE Initiative is available at [www.strobe-statement.org](http://www.strobe-statement.org).

# BMJ Open

## Measuring precarious employment in Sweden: Translation, adaptation and psychometric properties of the Employment Precariousness Scale (EPRES)

|                                 |                                                                                                                                                                                                                                                                                                                                                                                                                                                                                                                                                                                                                                                                                                                                                                                                                                                                                                                                                                                                                                                                                                                                                                                                                                                                                                                                                                                                                                |
|---------------------------------|--------------------------------------------------------------------------------------------------------------------------------------------------------------------------------------------------------------------------------------------------------------------------------------------------------------------------------------------------------------------------------------------------------------------------------------------------------------------------------------------------------------------------------------------------------------------------------------------------------------------------------------------------------------------------------------------------------------------------------------------------------------------------------------------------------------------------------------------------------------------------------------------------------------------------------------------------------------------------------------------------------------------------------------------------------------------------------------------------------------------------------------------------------------------------------------------------------------------------------------------------------------------------------------------------------------------------------------------------------------------------------------------------------------------------------|
| Journal:                        | <i>BMJ Open</i>                                                                                                                                                                                                                                                                                                                                                                                                                                                                                                                                                                                                                                                                                                                                                                                                                                                                                                                                                                                                                                                                                                                                                                                                                                                                                                                                                                                                                |
| Manuscript ID                   | bmjopen-2019-029577.R2                                                                                                                                                                                                                                                                                                                                                                                                                                                                                                                                                                                                                                                                                                                                                                                                                                                                                                                                                                                                                                                                                                                                                                                                                                                                                                                                                                                                         |
| Article Type:                   | Research                                                                                                                                                                                                                                                                                                                                                                                                                                                                                                                                                                                                                                                                                                                                                                                                                                                                                                                                                                                                                                                                                                                                                                                                                                                                                                                                                                                                                       |
| Date Submitted by the Author:   | 08-Aug-2019                                                                                                                                                                                                                                                                                                                                                                                                                                                                                                                                                                                                                                                                                                                                                                                                                                                                                                                                                                                                                                                                                                                                                                                                                                                                                                                                                                                                                    |
| Complete List of Authors:       | <p>Jonsson, Johanna; Karolinska Institutet, Institute of Environmental Medicine, Unit of Occupational Medicine</p> <p>Vives, Alejandra; Pontificia Universidad Catolica de Chile Escuela de Medicina, Department of Public Health; Universitat Pompeu Fabra, Department of Political and Social Sciences, Health Inequalities Research Group, Employment Conditions Knowledge Network (GREDS-EMCONET)</p> <p>Benach, Joan; Universitat Pompeu Fabra, Department of Political and Social Sciences, Health Inequalities Research Group, Employment Conditions Knowledge Network (GREDS-EMCONET); Universidad Autonoma de Madrid, Transdisciplinary Research Group on Socioecological Transitions (GinTRANS2)</p> <p>Kjellberg, Katarina; Karolinska Institutet, Institute of Environmental Medicine, Unit of Occupational Medicine; Stockholm County Council, Center for Occupational and Environmental Medicine</p> <p>Selander, Jenny; Karolinska Institutet, Institute of Environmental Medicine, Unit of Occupational Medicine</p> <p>Johansson, Gun; Karolinska Institute, Institute of Environmental Medicine, Unit of Occupational Medicine; Stockholm County Council, Center for Occupational and Environmental Medicine</p> <p>Bodin, Theo; Karolinska Institutet, Unit of Occupational Medicine, Institute of Environmental Medicine; Stockholm County Council, Center for Occupational and Environmental Medicine</p> |
| <b>Primary Subject Heading</b>: | Occupational and environmental medicine                                                                                                                                                                                                                                                                                                                                                                                                                                                                                                                                                                                                                                                                                                                                                                                                                                                                                                                                                                                                                                                                                                                                                                                                                                                                                                                                                                                        |
| Secondary Subject Heading:      | Epidemiology, Public health                                                                                                                                                                                                                                                                                                                                                                                                                                                                                                                                                                                                                                                                                                                                                                                                                                                                                                                                                                                                                                                                                                                                                                                                                                                                                                                                                                                                    |
| Keywords:                       | EPIDEMIOLOGY, OCCUPATIONAL & INDUSTRIAL MEDICINE, PUBLIC HEALTH, STATISTICS & RESEARCH METHODS                                                                                                                                                                                                                                                                                                                                                                                                                                                                                                                                                                                                                                                                                                                                                                                                                                                                                                                                                                                                                                                                                                                                                                                                                                                                                                                                 |
|                                 |                                                                                                                                                                                                                                                                                                                                                                                                                                                                                                                                                                                                                                                                                                                                                                                                                                                                                                                                                                                                                                                                                                                                                                                                                                                                                                                                                                                                                                |

SCHOLARONE™  
Manuscripts

1  
2  
3  
4  
5  
6  
7  
8  
9  
10  
11  
12  
13  
14  
15  
16  
17  
18  
19  
20  
21  
22  
23  
24  
25  
26  
27  
28  
29  
30  
31  
32  
33  
34  
35  
36  
37  
38  
39  
40  
41  
42  
43  
44  
45  
46  
47  
48  
49  
50  
51  
52  
53  
54  
55  
56  
57  
58  
59  
60

## Measuring precarious employment in Sweden: Translation, adaptation and psychometric properties of the Employment Precariousness Scale (EPRES)

Johanna Jonsson\* (MSc)<sup>1</sup>, Alejandra Vives (MD, PhD)<sup>2,3</sup>, Joan Benach (MD, PhD)<sup>3,4</sup>,  
Katarina Kjellberg (PhD)<sup>1,5</sup>, Jenny Selander (PhD)<sup>1</sup>, Gun Johansson (PhD)<sup>1,5</sup> & Theo  
Bodin (MD, PhD)<sup>1,5</sup>

1 Institute of Environmental Medicine, Unit of Occupational Medicine, Karolinska Institutet, Stockholm,  
Sweden

2 Department of Public Health, School of Medicine, Pontificia Universidad Católica de Chile

3 Health Inequalities Research Group, Employment Conditions Knowledge Network (GREDS-  
EMCONET), Department of Political and Social Sciences, Universitat Pompeu Fabra, Barcelona, Spain

4 Transdisciplinary Research Group on Socioecological Transitions (GinTRANS2). Universidad  
Autónoma Madrid, 28049 Madrid, Spain

5 Centre for Occupational and Environmental Medicine, Stockholm County Council, Stockholm,  
Sweden

\* Corresponding author:

Johanna Jonsson

Karolinska Institutet

Institute of Environmental Medicine, Unit of Occupational Medicine

Solnavägen 4, 11365

Stockholm, SWEDEN

[Johanna.Jonsson@ki.se](mailto:Johanna.Jonsson@ki.se)

Telephone: +46 737 665367



## ABSTRACT

**Objectives:** Precarious employment is a determinant of poor health and health inequality. However, the evidence of health consequences and mechanisms underlying the associations, are still limited due to a lack of a comprehensive multidimensional definition and measurement instrument. The Employment Precariousness Scale (EPRES) is a Spanish, multidimensional scale, developed to measure degree of precarious employment. The aim of this study was to translate the EPRES-2010 into Swedish, adapt it to the Swedish context, and to assess the psychometric properties of the Swedish EPRES.

**Method:** EPRES was translated, adapted and implemented for data collection within the research project PREMIS. During 2016-2017, questionnaire data was collected from 483 non-standard employees in Stockholm, Sweden, sampled with web-based respondent-driven sampling. Analyses included item descriptive statistics, scale descriptive statistics and exploratory factor analysis.

**Results:** The final EPRES-Se consisted of six dimensions and 23 items. There was a high response rate to all items and response options. Global Cronbach's alpha was 0.83. Subscales 'vulnerability', 'rights' and 'exercise rights' had reliability coefficients between  $\alpha = 0.78-0.89$  and item-subscale correlations between  $r = 0.48-0.78$ . 'Temporariness' had poor reliability ( $\alpha = -0.08$ ) and inter-item correlation ( $r = -0.04$ ), while 'disempowerment' showed acceptable psychometric properties ( $\alpha = 0.5$ ;  $r = 0.34$ ). Exploratory factor analysis confirmed the original EPRES factor structure.

**Conclusions:** 'Vulnerability', 'wages' 'rights', 'exercise rights' and 'disempowerment'

1  
2  
3 worked in the Swedish context; however 'temporariness' would need revising before  
4  
5  
6 implementing the EPRES-Se in further research. Continued work and validation of  
7  
8  
9 EPRES-Se is encouraged. In order to enable international comparisons and  
10  
11 multinational studies, similar studies in other European countries are also called for.  
12  
13  
14  
15

### 16 **Strengths and limitations of this study:**

- 17 • First translation and adaptation of the EPRES-2010 to Swedish and the Swedish  
18 context  
19
- 20 • First assessment of the psychometric properties of the EPRES-Se  
21
- 22 • Relatively small sample restricted to non-standard employees  
23
- 24 • Limited generalizability of results  
25  
26  
27  
28  
29  
30  
31  
32  
33  
34  
35  
36  
37  
38  
39  
40  
41  
42  
43  
44  
45  
46  
47  
48  
49  
50  
51  
52  
53  
54  
55  
56  
57  
58  
59  
60

## INTRODUCTION

1  
2  
3  
4  
5  
6 Precarious employment (PE) is considered a social determinant of poor health and  
7  
8 health inequality (1-3). PE is present in both developing as well as developed countries  
9  
10 (4, 5). However, evidence of the health consequences of precarious employment, and  
11  
12 by which mechanisms PE harm workers' health, is still limited due to the lack of a  
13  
14 comprehensive multidimensional definition and measurement instrument (6). This lack  
15  
16 also brings about challenges in terms of capturing the size of the population in  
17  
18 precarious employment, conducting occupational health and safety surveillance (6, 7),  
19  
20 as well as cross-country comparisons. The Employment Precariousness Scale (EPRES) is  
21  
22 a Spanish questionnaire developed to measure six dimensions of precarious  
23  
24 employment. EPRES has previously been validated in Spanish and Chilean populations  
25  
26 (8-11), and also applied to the population of Catalonia (12), but as of yet there is no  
27  
28 Swedish translation or adaptation.  
29  
30  
31  
32  
33  
34  
35  
36  
37  
38

### Precarious Employment

39  
40  
41 During the past decades, neoliberal economics and policies together with increased  
42  
43 globalization, trade competition, technological innovation and financial crises, has had  
44  
45 a considerable impact on the dynamics of the labour market (5, 13, 14). These impacts  
46  
47 have had several implications, including an increase in privatization, downsizing,  
48  
49 outsourcing, a weakening of union input and collective regulation, and a more  
50  
51 competitive and uncertain context for workers, with increases in flexible work,  
52  
53 unemployment and non-standard employment arrangements (5, 13, 14). Furthermore,  
54  
55  
56  
57  
58  
59  
60

1  
2  
3 there has been a decline in attachment to employers, risk shifting from employer to  
4  
5 employees, growth in perceived and actual job insecurity and work-based stress, as  
6  
7 well as diminished bargaining power and rights (13, 14).  
8  
9

10  
11 Non-standard arrangements, in comparison with standard employment  
12  
13 contracts (i.e., open-ended full-time contracts), includes part-time work  
14  
15 (underemployment), temporary work, temporary agency work, zero hour contracts,  
16  
17 "gig" work arrangements and self-employment (1, 4, 7, 14, 15). Non-standard work can  
18  
19 also include holding multiple jobs (16). A comprehensive term used to describe forms  
20  
21 of non-standard employment is "precarious employment" (17). Precarious employment  
22  
23 does not, however, solely refer to the type of employment, but also to unfavorable  
24  
25 employment conditions, such as vulnerability, low pay, low levels of social security and  
26  
27 rights (3, 4, 14, 17-21). As these elements are not exclusively found in non-standard  
28  
29 employments *per se*, employees in a standard employment also are at risk of  
30  
31 experiencing precariousness (14, 22, 23). Thereby, it is important to move beyond a  
32  
33 simplistic categorical grouping of employment, such as temporary vs. permanent, and  
34  
35 instead work towards a comprehensive multidimensional approach that enables a  
36  
37 better understanding of precarious employment (16, 23).  
38  
39  
40  
41  
42  
43  
44  
45  
46  
47

48  
49 Several definitions and attempts to create multidimensional constructs  
50  
51 capturing precarious employment already exist. In terms of the previous, Rodgers and  
52  
53 Rodgers include employment instability, employment insecurity, lack of protection and  
54  
55 economic/social vulnerability as components in their definition of precarious  
56  
57 employment (17); and the International Labour Organization (ILO) include low wage,  
58  
59  
60

1  
2  
3 poor protection from termination of employment, lack of access to social  
4 protection/benefits (usually associated with full-time standard employment) and lack  
5 of/limited access to exercise rights at work (21). To our knowledge, two validated  
6 questionnaires have been developed for the purpose of measuring precarious  
7 employment: The Employment Precarity Index, identifying employment precarity by  
8 ten questions and dividing scores in four groups: secure, stable, vulnerable and  
9 precarious (23); and the EPRES with its six dimensions: 'temporariness', 'wages',  
10 'disempowerment', 'vulnerability', 'rights' and 'exercise rights', where precarity ranges  
11 from low to high (10). Several studies have also used a combination of indicators as  
12 proxy measures in order to identify precarious employment (see e.g. (24-26)). Despite  
13 these efforts, there is of yet no universally accepted definition or operationalization.

14  
15  
16 By the means of a cross-national multidimensional definition and measurement  
17 instrument of precarious employment, comparative and more precise estimations of  
18 health effects would be made possible. Previously, PE has been linked to an array of  
19 health issues including mental and physical health (2, 27) and occupational injuries (28).  
20 Previous research on related concepts such as job insecurity and temporary  
21 employment also show consistent associations with various health outcomes (29-32).  
22 Mechanisms linking precarious employment and health are not yet fully understood  
23 but pathways that have been suggested include more harmful working conditions,  
24 limited control over one's professional and personal lives, feelings of insecurity and  
25 incomes below the subsistence level, which consequently can affect other social  
26 determinants of health such as housing quality, lifestyles and so on (33).

## **The Employment Precariousness Scale (EPRES)**

EPRES is a Spanish, multidimensional theory-based scale, developed to measure degree of precarious employment among waged and salaried workers (8). EPRES is comprised of 22 items and six subscales corresponding to six dimensions: 'temporariness' (contract duration; two items), 'wages' (low or insufficient; possible economic deprivation; three items), 'disempowerment' (level of negotiation of employment conditions; two items), 'vulnerability' (defenselessness to authoritarian treatment; five items), 'rights' (entitlement to workplace rights and social security benefits; four items) and 'exercise rights' (powerlessness, in practice, to exercise workplace rights; six items) (8, 9). EPRES items are scored on a 5-point or 3-point scale, depending on item, and all items taken together will give a global score ranging between 0 (least precarious) and 4 (most precarious) (34). EPRES has demonstrated good acceptability, good internal consistency and evidence of construct validity in Spanish and Chilean populations (8, 9). The original EPRES scale was revised in 2015 (hereafter known as EPRES-2010), which showed good metric properties and improved sensitivity to worker vulnerability and employment stability (10). Further details about EPRES and its development has been described elsewhere (34).

## **Precarious employment in Sweden**

In Sweden, much of previous research has focused on health outcomes of PE and related exposures. Some studies have focused on exposures such as temporary

1  
2  
3 employment (35), peripheral employment (36), and temporary employment and job  
4  
5 insecurity (37). Fewer studies have created proxies of multidimensional exposures of  
6  
7 PE, for instance by combining previous unemployment, temporary/permanent  
8  
9 employment and perceived job insecurity (38); or by identifying multiple indicators of  
10  
11 precarious employment (e.g., type of contract, income, working times etc.) (26). It is  
12  
13 challenging to put Sweden in a larger comparative context of precarious employment  
14  
15 as there is no consensus on its operationalization. Sweden has, according to some  
16  
17 definitions (as defined by a typological approach of 11 indicators), one of the smallest  
18  
19 proportions of precarious employees among the Scandinavian countries (19). However,  
20  
21 in other measures (defined by involuntary part-time work, temporary employment and  
22  
23 fear of job-loss) Sweden has the highest proportion of precarious employed individuals  
24  
25 (24) and the highest proportion of fixed-term employment contracts (39) in the same  
26  
27 context. Reports show that the Swedish labour market is growing increasingly more  
28  
29 insecure, especially for temporary employees (40, 41). The proportion of temporary  
30  
31 employees has been stable around 15-17% since the late 1990's (41, 42). There has,  
32  
33 however, been reports on a shift within this group where longer-term positions have  
34  
35 been replaced by a higher proportion of on-demand employees and day laborers,  
36  
37 which are more precarious by nature (40, 41, 43). Especially women (19%, compared to  
38  
39 15% among men), 16-24 year-olds (56%, compared to 21% among 25-34 year-olds  
40  
41 and 9% among 35-44 year-olds), and foreign born (24%, compared to 15% among  
42  
43 individuals born in Sweden) are likely of holding a temporary employment (41). These  
44  
45 are groups that reportedly are exposed to high employment precariousness (19).  
46  
47  
48  
49  
50  
51  
52  
53  
54  
55  
56  
57  
58  
59  
60

1  
2  
3 Further, around 10% of the employees in Sweden are not covered by collective  
4 bargaining agreements and around 9% have multiple jobs. The latter has seen an  
5 increase with 1.5% percentage points since 2005 (43). According to a definition by the  
6 Swedish Labour Policy Council, the group of atypical employees is constituted by those  
7 that fulfil one of the following: not being covered by a collective bargaining agreement,  
8 have a temporary employment, are employed by a temp agency or are self-employed,  
9 have their own company, hold multiple jobs or are working in the informal sector. This  
10 group of atypical workers is estimated to be around 35-39% of the Swedish workforce  
11 (43), and likely of experiencing precariousness.

12  
13  
14  
15  
16  
17  
18  
19  
20  
21  
22  
23  
24  
25  
26  
27  
28  
29  
30  
31  
32  
33  
34  
35  
36  
37  
38  
39  
40  
41  
42  
43  
44  
45  
46  
47  
48  
49  
50  
51  
52  
53  
54  
55  
56  
57  
58  
59  
60  
Thereby, despite the stable levels of temporary employment in Sweden, it could  
be assumed that the level of precariousness has increased on the Swedish labour  
market. A study from Finland, however, indicate that the precariat (as defined by  
atypical employment, previous unemployment, fear of job-loss, poor prospects of  
employment and low earnings) has not seen an increase the past couple of decades  
(44). Without longitudinal studies with precise measures of precarious employment  
assessing changes over time, evidence in Sweden remains inconclusive.

To our knowledge, this is the first study in Sweden aiming at translating and  
adapting a validated multidimensional measurement of precarious employment,  
EPRES, to Swedish and the Swedish context. It is an important step in the direction to  
more precisely and fully comprehend the distribution and trends of precarious  
employment in the Swedish population, as well as it will allow for future studies on  
health outcomes of precarious employment. Further, such an instrument will also



1  
2  
3 enable well-needed cross-country comparisons.  
4  
5  
6  
7

## 8 **Aim**

9  
10  
11 The aim of this study was to translate the EPRES-2010 into Swedish, adapt it to the  
12  
13 Swedish context, and to assess the psychometric properties of the Swedish EPRES.  
14  
15  
16

## 17 **METHOD**

18  
19  
20  
21 In order to fulfil the study aims, the EPRES-2010 was first translated into Swedish and  
22  
23 subsequently adapted to suit the Swedish context (hereafter known as EPRES-Se).  
24  
25 Thereafter, EPRES-Se was piloted and implemented as a part of the survey used in the  
26  
27 research project Precarious Employment in Stockholm (PREMIS).  
28  
29  
30  
31  
32  
33  
34

### 35 **Translation and adaptation of EPRES**

36  
37 The translation and adaptation process of the EPRES-2010 consisted of five steps: 1.  
38  
39 Translation from Spanish to Swedish; 2. Cultural adaptation to fit the Swedish context;  
40  
41 3. Back translation to Spanish and adjustments; 4. Pilot testing; 5. Final adaptations  
42  
43 based on user feedback in pilot.  
44  
45  
46  
47

48  
49 1. The Spanish version of the revised EPRES-2010 scale, which has been  
50  
51 published elsewhere (10), was translated into Swedish. The translation was done by a  
52  
53 bilingual member of the research team (TB) in close discussion with AV, a native  
54  
55 Spanish speaker with previous experience of validation studies of EPRES.  
56  
57  
58  
59  
60

1  
2  
3           2. Several adaptations of the questionnaire were implemented in order to fit  
4  
5 Swedish labour market conditions. The questionnaire and its translation was discussed  
6  
7 during workshops in the project team, which consisted of Swedish, Spanish and Chilean  
8  
9 researchers within public - and occupational health, as well as within the reference  
10  
11 group involved in PREMIS, which consisted of labour union members and workers with  
12  
13 experience of precarious employment.  
14  
15  
16  
17

18  
19           3. Several drafts of the Swedish questionnaire were translated back to Spanish  
20  
21 during the adaptation process and discussed until the final translation was decided  
22  
23 upon.  
24  
25

26  
27           4. A two-stage pilot testing was performed: first face-to-face with five volunteers  
28  
29 from the reference group, and thereafter online with six volunteers who were currently  
30  
31 working but without a permanent full-time employment. The latter were also asked to  
32  
33 participate in an evaluation of the survey either via the phone or online.  
34  
35  
36

37  
38           5. With the input from the pilot, a few minor adaptations were made to the  
39  
40 EPRES.  
41

42  
43  
44  
45 Further, in order to offer non-Swedish speaking participants an opportunity to  
46  
47 participate in the PREMIS-study, the PREMIS-survey, including the Swedish version of  
48  
49 EPRES, was translated into English by an external, professional, translator. After the  
50  
51 translation, minor changes in terms of style and terminology was made by the research  
52  
53 group. The English translation of the EPRES-Se was not validated in this study, nor has  
54  
55 it been validated in any previous studies.  
56  
57  
58  
59  
60

## Implementation of the EPRES-Se

PREMIS is an ongoing, longitudinal, web-based study conducted in Stockholm county, Sweden. PREMIS aims at methodological development in terms of sampling strategies and assessment of precarious employment, as well as at studying health outcomes of precarious employment. In 2016-2017, 483 non-standard employees were sampled with web-based respondent-driven sampling (webRDS). WebRDS uses peer-to-peer recruitment to build a sample from populations that are hard-to-reach and therefore lacks a sampling frame (45). Questionnaire data was collected through an online survey tool specifically developed for RDS (46). The PREMIS-survey included all the items of the EPRES-Se, as well as questions on employment type, occupational environment, health outcomes and background. The survey could be completed in Swedish or English.

As one of the aims of PREMIS was to sample precarious employees with webRDS, a process which has been described elsewhere (47), participation in the study was restricted to individuals considered particularly vulnerable to precarious employment conditions, such as individuals with temporary employment, on-demand employment, involuntary part-time employment and involuntary self-employment. The inclusion criteria for participants were: living and/or working in Stockholm County, being aged 18-65 years, having and indicating a Swedish personal identification number, and having a current employment. Exclusion criteria were: having a fixed, full-time, employment, being voluntarily self-employed or being a student. Out of the 483

1  
2  
3 participants included in the sample, 68 participants were excluded due to not matching  
4  
5 criteria of county (n=6), re-using or giving an incorrect personal number (n = 8 and  
6  
7 n=17, respectively), being underage (n = 1) or suspected cheating (i.e., systematic  
8  
9 repeated participation; n=36), giving a final sample of 415 participants.  
10  
11  
12  
13  
14  
15

### 16 **Statistical analysis**

17  
18 Item descriptive statistics (mean, standard deviations, response frequencies, missing  
19  
20 responses and Pearson item-subscale correlations) and scale descriptive statistics  
21  
22 (mean, standard deviations, missing items, range, floor and ceiling effects, and  
23  
24 reliability (Cronbach's alpha coefficient) were assessed for the entire sample.  
25  
26 Participants answering "No answer" on the question on income (question three in  
27  
28 EPRES-Se) were excluded from the analyses of this question due to the ambiguity of  
29  
30 the response alternative. Exploratory factor analysis was conducted in order to  
31  
32 determine the underlying factor structure of the data. Principal axis factoring, with  
33  
34 varimax rotation, extracting eigenvalues >1 was used, which is the method used in  
35  
36 previous EPRES-studies (8-10). Subanalyses were conducted without informal workers,  
37  
38 i.e., participants answering "I have no contract" to the question on contract duration  
39  
40 (question one in EPRES-Se). Further, as the sample was recruited with respondent-  
41  
42 driven sampling (RDS), weighted analyses were conducted in addition to the  
43  
44 unweighted analyses. RDSII weights (48) were calculated in RDS Analyst 0.42 for  
45  
46 Windows (Los Angeles, CA). In short, weights are based on the self-reported network  
47  
48 size in the target population (*degree*) of the participant and applied in order to account  
49  
50  
51  
52  
53  
54  
55  
56  
57  
58  
59  
60

1  
2  
3 for over-sampling of individuals included in large social networks. Participants with  
4  
5 large social networks are given a smaller weight, and vice versa (48, 49). The results  
6  
7 from the weighted analyses will be shown in full in the supplementary material. All  
8  
9 analyses were performed using SPSS version 23 (IBM SPSS Statistics for Windows,  
10  
11 Version 23. Armonk, NY:IBM Corp).  
12  
13  
14  
15  
16  
17  
18

### 19 **Ethical considerations**

20  
21 Permission from the Regional Ethics Committee of Stockholm was given for the study,  
22  
23 with dnr: 2016/1291-31/5. Informed consent was attained from all participants by the  
24  
25 respondent clicking "Yes" to the question "I understand the information given above  
26  
27 and want to participate".  
28  
29  
30  
31  
32  
33  
34

### 35 **Patient and public involvement**

36  
37 In PREMIS, a reference group consisting of individuals with experience from  
38  
39 precarious employment and labour union representatives, was involved in the design  
40  
41 of the PREMIS-survey (design of survey and formulation of questions not otherwise  
42  
43 standardized) and data collection process (deciding on the appropriate compensation  
44  
45 for participation, recruitment of participants and testing the survey software) through  
46  
47 active discussions and workshops. Results will be disseminated to study participants  
48  
49 through the website of the PREMIS-study.  
50  
51  
52  
53  
54  
55  
56  
57  
58  
59  
60

## **RESULTS**

### Adaptations of EPRES-Se

The following adaptations were made to the EPRES-Se in comparison with EPRES-2010.

- (1) The response alternatives in 'temporariness' were stated as categories, as opposed to free text values of number of days, months or years in EPRES-2010, in order to increase usability in the web-survey context. For the same reason, the question on contract duration which contained three dependent items in EPRES-2010, was collapsed into one question in EPRES-Se. In addition, the response options "I do not have a contract" was added in order to capture informal work and "Do not know" was added in order to capture poor contractual relationship.
- (2) In 'wages', the question of income was presented in local currency (SEK) and intervals were set to ~300 EUR as the 150-200 EUR intervals used in the EPRES-2010 version were perceived as too narrow in the Swedish context. In EPRES-2010, intervals were 150 EUR - 200 EUR below a monthly income of 1200 EUR, and 300 EUR above an income of 1201 EUR.
- (3) In EPRES-2010, the two response alternatives capturing working conditions that were decided unilaterally by the employer, were merged into one response option in the Swedish adaptation in order to enhance usability . Further, as some workers, especially freelancers, are given a fixed budget with no hours specified, the response alternative "Not applicable. I work project-based" was added for the question on how salary was decided upon,

- 1  
2  
3 (4) One of the items in 'vulnerability', "afraid to demand better working conditions...",  
4  
5  
6 was taken from the original EPRES-scale (8) according to the recommendations  
7  
8 made by Vives et al. 2015 (10).  
9  
10  
11 (5) In 'rights', the question on pension in EPRES-2010 , which contained both pension  
12  
13 due to old age and disability, was split in two as these are distinct systems unrelated  
14  
15 to one another in the Swedish context. Retirement pension (i.e., pension due to old  
16  
17 age) was kept in EPRES-Se and disability pension was removed. However, a new  
18  
19 item assessing the right to sickness benefit was added in the subscale instead,  
20  
21 capturing both long term sick leave and shorter spells of sickness absence,  
22  
23  
24  
25  
26  
27 (6) In 'exercise of rights' the item on taking a day off for family reasons was clarified by  
28  
29 adding "care of a sick child, care of a sick relative etc." within brackets.  
30  
31  
32  
33  
34

### 35 **EPRES-Se**

36  
37 The final version of EPRES-Se consisted of a total of 23 items and six dimensions:  
38  
39 'temporariness' (two items), 'wages' (three items), 'disempowerment' (two items),  
40  
41 'vulnerability' (five items), 'rights' (five items) and 'exercise rights' (six items). As in the  
42  
43 EPRES-2010, the response scales were 5-point ordinal scales for 'temporariness', 5-  
44  
45 point ordinal and 5-point frequency scales for 'wages', 5-point frequency scales for  
46  
47 'vulnerability' and 'exercise rights', and 5-point and 3-point categorical scales for  
48  
49 'disempowerment' and 'exercise rights', respectively. See EPRES-Se in supplementary  
50  
51 material A.  
52  
53  
54  
55  
56  
57  
58  
59  
60

## Coding of EPRES-Se

Similarly as EPRES-2010, subscale scores were computed as averages and transformed into a 0-4 scale. The global EPRES score is the average of the six subscales, ranging from 0-4, where 0 represent the lowest level of precariousness and 4 represent the highest level of precariousness.

For questions in 'temporariness', response options were coded slightly different compared to EPRES-2010 in order to accommodate the changes made in the Swedish version. For instance, in the question of duration of contract, response options "Do not have a contract" and "Do not know" were coded as 4 (most precarious), in comparison with the Spanish version where a contract length of less than six months was coded as 4. In the question on income, intervals were larger and consistent in size, as compared to the Spanish version. The cut-offs for income were based on the Swedish median net income for 2016, which was just above 18000 SEK for individuals 20-64 years of age (50). The merging of items in 'disempowerment' did not affect the coding. The coding of the individual items along with the English translation of EPRES-Se can be found in the supplementary material B.

## Issues leading to recoding of 'temporariness' dimension

When conducting the data analyses it was revealed that 79% (n=139) of the respondents answering 'indefinitely' to the EPRES question on contract length ("How long is your current employment contract valid?") also answered that they were employed on demand/by the hour on a question assessing employment type included



1  
2  
3 in the PREMIS-survey. We suspected that this combination could be a type of “zero  
4  
5 hour” contract, in which the employer is not required to offer the employee any fixed  
6  
7 number of hours of work at all per day, week or month (39). Thereby, this type of  
8  
9 employment situation could be regarded as contingent with a high degree of  
10  
11 precariousness. This was confirmed as the group indicating an indefinite contract  
12  
13 length *and* on-demand/by the hour employment, were most similar (in terms of the  
14  
15 other EPRES subscales) to employees with a contract lasting less than 1 month and  
16  
17 least alike employees with a fixed-term contract >2 years. Consequently, we re-coded  
18  
19 the group with an indefinite contract *and* on demand/by the hour-employment from  
20  
21 0 to 3 (i.e., the same coding as the response alternative <1 month contract). Those with  
22  
23 any other employment type and an indefinite contract (n=36) remained coded as 0.  
24  
25 See results of subscale-average comparisons in the supplementary material C.  
26  
27  
28  
29  
30  
31  
32  
33  
34  
35  
36  
37

### 38 **Psychometric properties of EPRES-Se**

39  
40 The demographic characteristics of the sample is shown in Table 1. The sample  
41  
42 consisted of a larger proportion 25-29 year-olds (45%) compared to the other age-  
43  
44 groups, and a larger proportion women (54%) as compared to men. Further, the sample  
45  
46 was dominated by workers employed on demand/by the hour (59%).  
47  
48  
49

50  
51 Table 2 shows the item-descriptive statistics. There was a small proportion of  
52  
53 missing values (< 3%). Item means were similar within subscales, with the greatest  
54  
55 mean difference found within ‘wages’ (item mean difference = 1.6). All response  
56  
57 options within the items were used by participants, although to a varying extent. Item-  
58  
59  
60

subscale correlations were around 0.6-0.8 in 'vulnerability' and 'exercise of rights'; and around 0.4-0.6 in 'wages' and 'rights'. There was a weak correlation between item and subscale in 'disempowerment' and no correlation between items in 'temporariness'. With exception of the latter, all items correlated higher with their corresponding subscale compared to other subscales.

**Table 1. Demographic characteristics of the study population (frequencies and percentages), N=415**

|                   |                                  | N   | %  |
|-------------------|----------------------------------|-----|----|
| <b>Age</b>        | 18-24                            | 122 | 29 |
|                   | 25-29                            | 185 | 45 |
|                   | 30-64                            | 108 | 26 |
| <b>Sex</b>        | Male                             | 190 | 46 |
|                   | Female                           | 225 | 54 |
| <b>Employment</b> | Temporary employment             | 121 | 29 |
|                   | Employed on demand/by the hour   | 243 | 59 |
|                   | Self-employed (involuntary)      | 13  | 3  |
|                   | Intern                           | 2   | 1  |
|                   | Part-time employed (involuntary) | 36  | 9  |

Table 3 shows the scale descriptive statistics. The subscale mean scores ranged between 1.4 and 2.3, with a global average of 1.9. The proportion of participants with any missing values in the subscales were around 1%, except in the case of 'wages' where it was 3.1%. The latter also included participants answering "No answer" (n=9). Subscale scores ranged between 0-4, and global scale score ranged between 0.09-3.07. Both floor and ceiling effects were generally low (< 5%), with floor effects being highest for 'disempowerment' (9.2%) and 'vulnerability' (11.7%), and ceiling effects being highest for 'rights' (18.0%). Cronbach's alpha coefficients were around 0.7 or higher for

1  
2  
3 'wages', 'vulnerability', 'rights' and 'exercise of rights'. Only 'temporariness' exhibited a  
4  
5  
6 Cronbach's alpha coefficient close to 0. The global alpha coefficient was 0.83.  
7

8  
9 The exploratory factor analysis extracted six factors with eigenvalues above 1  
10  
11 (eigenvalues = 5.3; 3.2; 2.3; 1.6; 1.3; 1.1). The emerging factors were the same as in  
12  
13 EPRES-2010, thereby confirming the original factor structure. Together, the six factors  
14  
15 explained 64.1% of the variance. The six factors and their rotated factor loadings are  
16  
17 shown in Table 4. All loadings were above 0.35, except in the case of "length of  
18  
19 contract".  
20  
21  
22  
23

24  
25 Subanalyses were conducted in order to investigate the potential effect of  
26  
27 including informal workers in the sample (n=35), which had minor influence on the  
28  
29 correlation between temporariness-items ( $r=0.002$ ) and reliability of the subscale (-  
30  
31 0.003). However, in the factor analysis seven factors with eigenvalues >1 emerged (5.3;  
32  
33 3.2; 2.3; 1.6; 1.3; 1.1; 1.0), explaining 68.5% of the variance. The seventh factor was  
34  
35 caused by a split of the temporariness dimension, grouping items on length of contract  
36  
37 (duration) and time working for employer (tenure) in separate factors, with factor  
38  
39 loadings of 0.33 and 0.42 respectively.  
40  
41  
42  
43  
44

45  
46 Analyses for the weighted population sample resulted in virtually the same  
47  
48 results in regard to item-subscale correlations, Cronbach's alpha coefficients, floor  
49  
50 and ceiling effects, as well as factor loadings from the exploratory factor analysis of  
51  
52 EPRES-Se, and did thereby not affect the interpretation of the results. See the  
53  
54 weighted results in table 1-4 in Supplementary material D.  
55  
56  
57  
58  
59  
60

Table 2. Item descriptive statistics and Pearson item-subscale correlations of EPRES-Se

| Item                              | Missing % <sup>1</sup> | Mean | SD <sup>2</sup> | Response value frequency (%) <sup>3</sup> |            |            |            |           | Pearson item subscale correlations <sup>4</sup> |             |             |             |             |      |
|-----------------------------------|------------------------|------|-----------------|-------------------------------------------|------------|------------|------------|-----------|-------------------------------------------------|-------------|-------------|-------------|-------------|------|
|                                   |                        |      |                 | 0                                         | 1          | 2          | 3          | 4         | T                                               | W           | D           | V           | R           | ER   |
| <b>Temporariness<sup>5</sup></b>  |                        |      |                 |                                           |            |            |            |           |                                                 |             |             |             |             |      |
| Length of contract                | 0.0                    | 2.6  | 1.1             | 36 (8.7)                                  | 24 (5.8)   | 75 (18.1)  | 228 (54.9) | 52 (12.5) | -                                               | 0.04        | 0.05        | 0.06        | 0.08        | 0.04 |
| Time working empl.                | 0.0                    | 2.1  | 0.9             | 17 (4.1)                                  | 92 (22.2)  | 171 (41.2) | 119 (28.7) | 16 (3.9)  | <b>0.04</b>                                     | -           | 0.06        | 0.11        | -           | 0.31 |
|                                   |                        |      |                 |                                           |            |            |            |           | <b>0.04</b>                                     |             |             | 0.04        |             |      |
| <b>Wages</b>                      |                        |      |                 |                                           |            |            |            |           |                                                 |             |             |             |             |      |
| Income monthly                    | 2.2                    | 2.4  | 1.2             | 43 (10.6)                                 | 45 (11.1)  | 87 (21.4)  | 171 (42.1) | 60 (14.8) | 0.09                                            | <b>0.39</b> | 0.14        | -           | 0.29        | 0.17 |
| Cover basic need                  | 1.0                    | 0.8  | 0.9             | 175 (42.6)                                | 171 (41.6) | 44 (10.7)  | 14 (3.4)   | 7 (1.7)   | -                                               | <b>0.60</b> | 0.07        | 0.21        | 0.13        | 0.26 |
| Cover unforeseen expen.           | 1.0                    | 1.8  | 1.1             | 60 (14.6)                                 | 113 (27.5) | 136 (33.1) | 70 (17.0)  | 32 (7.8)  | 0.02                                            | <b>0.55</b> | 0.08        | 0.39        | 0.14        | 0.26 |
| <b>Disempowerment<sup>5</sup></b> |                        |      |                 |                                           |            |            |            |           |                                                 |             |             |             |             |      |
| Working hour settled              | 0.0                    | 2.1  | 1.2             | 84 (20.2)                                 | 8 (1.9)    | 110 (26.5) | 190 (45.8) | 23 (5.5)  | 0.12                                            | 0.17        | <b>0.34</b> | 0.10        | 0.26        | 0.23 |
| Salary settled                    | 0.0                    | 2.2  | 1.2             | 77 (18.6)                                 | 8 (1.9)    | 101 (24.3) | 210 (50.6) | 19 (4.6)  | 0.07                                            | 0.03        | <b>0.34</b> | 0.02        | 0.13        | 0.09 |
| <b>Vulnerability</b>              |                        |      |                 |                                           |            |            |            |           |                                                 |             |             |             |             |      |
| Demand work cond.                 | 1.0                    | 1.6  | 1.2             | 79 (19.2)                                 | 129 (31.4) | 113 (27.5) | 63 (15.3)  | 27 (6.6)  | 0.01                                            | 0.13        | 0.09        | <b>0.75</b> | 0.04        | 0.28 |
| Unfair treatment                  | 1.0                    | 1.3  | 1.1             | 114 (27.7)                                | 159 (38.7) | 67 (16.3)  | 50 (12.2)  | 21 (5.1)  | -                                               | 0.12        | 0.08        | <b>0.78</b> | -           | 0.26 |
|                                   |                        |      |                 |                                           |            |            |            |           | 0.03                                            |             |             |             | 0.01        |      |
| Afraid fired                      | 1.0                    | 1.5  | 1.2             | 106 (25.8)                                | 130 (31.6) | 81 (19.7)  | 60 (14.6)  | 34 (8.3)  | 0.06                                            | 0.20        | 0.10        | <b>0.78</b> | 0.04        | 0.35 |
| Treated authoritarian             | 1.0                    | 1.3  | 1.1             | 107 (26.0)                                | 160 (38.9) | 87 (21.2)  | 36 (8.8)   | 21 (5.1)  | -                                               | 0.20        | -           | <b>0.63</b> | 0.02        | 0.23 |
|                                   |                        |      |                 |                                           |            |            |            |           | 0.04                                            |             | 0.01        |             |             |      |
| Easily replaced                   | 1.0                    | 1.6  | 1.3             | 91 (22.1)                                 | 124 (30.2) | 92 (22.4)  | 55 (13.4)  | 49 (11.9) | 0.06                                            | 0.22        | 0.02        | <b>0.74</b> | 0.04        | 0.27 |
| <b>Rights</b>                     |                        |      |                 |                                           |            |            |            |           |                                                 |             |             |             |             |      |
| Right parental leave              | 1.2                    | 1.2  | 0.8             | 100 (24.4)                                | 130 (31.7) | 180 (43.9) |            |           | 0.18                                            | 0.16        | 0.26        | 0.05        | <b>0.58</b> | 0.16 |
| Right retirement                  | 1.2                    | 1.2  | 0.8             | 107 (26.1)                                | 113 (27.6) | 190 (46.3) |            |           | 0.26                                            | 0.22        | 0.23        | 0.07        | <b>0.60</b> | 0.16 |
| Right unemployment                | 1.2                    | 1.0  | 0.9             | 156 (38.0)                                | 100 (24.4) | 154 (37.6) |            |           | 0.15                                            | 0.24        | 0.15        | -           | <b>0.60</b> | 0.08 |
|                                   |                        |      |                 |                                           |            |            |            |           |                                                 |             |             | 0.01        |             |      |
| Right severance pay               | 1.2                    | 1.4  | 0.6             | 20 (4.9)                                  | 223 (54.4) | 167 (40.7) |            |           | 0.11                                            | 0.06        | 0.03        | -           | <b>0.48</b> | 0.03 |
|                                   |                        |      |                 |                                           |            |            |            |           |                                                 |             |             | 0.02        |             |      |
| Right sickness benefits           | 1.2                    | 0.9  | 0.8             | 160 (39.0)                                | 110 (26.8) | 140 (34.1) |            |           | 0.26                                            | 0.18        | 0.17        | 0.03        | <b>0.53</b> | 0.12 |
| <b>Exercise of rights</b>         |                        |      |                 |                                           |            |            |            |           |                                                 |             |             |             |             |      |

|   |                     |     |     |     |            |            |            |           |           |      |      |      |      |      |             |
|---|---------------------|-----|-----|-----|------------|------------|------------|-----------|-----------|------|------|------|------|------|-------------|
| 1 |                     |     |     |     |            |            |            |           |           |      |      |      |      |      |             |
| 2 |                     |     |     |     |            |            |            |           |           |      |      |      |      |      |             |
| 3 | Take weekend off    | 1.0 | 1.6 | 1.1 | 86 (20.9)  | 93 (22.6)  | 154 (37.5) | 48 (11.7) | 30 (7.3)  | -    | 0.23 | 0.18 | 0.18 | 0.10 | <b>0.62</b> |
| 4 |                     |     |     |     |            |            |            |           |           | 0.01 |      |      |      |      |             |
| 5 | Take vacation       | 1.2 | 1.9 | 1.1 | 50 (12.2)  | 88 (21.5)  | 163 (39.8) | 77 (18.8) | 32 (7.8)  | 0.14 | 0.22 | 0.20 | 0.30 | 0.15 | <b>0.68</b> |
| 6 | Take day off        | 1.2 | 1.6 | 1.1 | 88 (21.5)  | 85 (20.7)  | 166 (40.5) | 50 (12.2) | 21 (5.1)  | 0.15 | 0.19 | 0.21 | 0.24 | 0.16 | <b>0.75</b> |
| 7 | Take day off, pers. | 1.0 | 1.9 | 1.2 | 63 (15.3)  | 78 (19.0)  | 159 (38.7) | 69 (16.8) | 42 (10.2) | 0.11 | 0.21 | 0.08 | 0.36 | 0.07 | <b>0.74</b> |
| 8 | Sick leave          | 1.2 | 1.6 | 1.1 | 98 (23.9)  | 74 (18.0)  | 163 (39.8) | 50 (12.2) | 25 (6.1)  | 0.06 | 0.22 | 0.20 | 0.26 | 0.12 | <b>0.69</b> |
| 9 | Go to doctor        | 1.0 | 1.1 | 1.1 | 140 (34.1) | 126 (30.7) | 106 (25.8) | 25 (6.1)  | 14 (3.4)  | 0.11 | 0.26 | 0.09 | 0.25 | 0.14 | <b>0.64</b> |

<sup>1</sup> Proportion of participants with any missing item; <sup>2</sup> SD=Standard Deviation; <sup>3</sup> Frequency (%) of participants indicating the specific response. 0 indicates the lowest precariousness score, 4 indicating the highest precariousness score. <sup>4</sup> Corrected for overlap, i.e., item is removed from the corresponding subscale. T=Temporariness; W=Wages; D=Disempowerment; V=Vulnerability; R=Rights; ER=Exercise rights. <sup>5</sup> Inter-item correlations

**Table 3. Scale descriptive statistics: range, mean, standard deviation (SD), floor and ceiling effects and Cronbach's alpha coefficient**

| Subscale           | Items | Mean | SD  | Missing (%) <sup>1</sup> | Obs. range | Floor % <sup>2</sup> | Ceiling % <sup>2</sup> | Cronbach's alpha |
|--------------------|-------|------|-----|--------------------------|------------|----------------------|------------------------|------------------|
| Temporariness      | 2     | 2.3  | 0.7 | 0.0                      | 0-4        | 0.5                  | 1.0                    | -0.08            |
| Wages              | 3     | 1.6  | 0.8 | 3.1                      | 0-4        | 4.2                  | 0.7                    | 0.69             |
| Disempowerment     | 2     | 2.1  | 1.0 | 0.0                      | 0-4        | 9.2                  | 1.4                    | 0.50             |
| Vulnerability      | 5     | 1.4  | 1.0 | 1.0                      | 0-4        | 11.7                 | 1.9                    | 0.89             |
| Rights             | 5     | 2.3  | 1.2 | 1.2                      | 0-4        | 2.9                  | 18.0                   | 0.78             |
| Exercise of rights | 6     | 1.6  | 0.9 | 1.2                      | 0-4        | 6.8                  | 1.0                    | 0.88             |
| EPRES-se           | 23    | 1.9  | 0.5 | 3.4                      | 0.09-3.07  | 0.2                  | 0.2                    | 0.83             |

<sup>1</sup> Proportion of participants with any missing item

<sup>2</sup> Proportion of participants with lowest (floor) and highest (ceiling) EPRES-Se scores

**Table 4. Factor loadings from exploratory factor analysis of the EPRES-Se**

|                         | Factor          |               |             |             |                |               |
|-------------------------|-----------------|---------------|-------------|-------------|----------------|---------------|
|                         | Exercise rights | Vulnerability | Rights      | Wages       | Disempowerment | Temporariness |
| <b>Temporariness</b>    |                 |               |             |             |                |               |
| Length of contract      |                 |               |             |             |                | <b>0.12</b>   |
| Time working empl.      | 0.12            |               | 0.36        |             |                | <b>-0.36</b>  |
| <b>Wages</b>            |                 |               |             |             |                |               |
| Income monthly          | 0.14            | -0.16         | 0.23        | <b>0.49</b> |                | 0.35          |
| Cover basic need        | 0.17            | 0.13          |             | <b>0.71</b> |                |               |
| Cover unforeseen expen. | 0.12            | 0.32          |             | <b>0.79</b> |                | -0.10         |
| <b>Disempowerment</b>   |                 |               |             |             |                |               |
| Working hour settled    | 0.17            |               | 0.21        |             | <b>0.52</b>    | 0.15          |
| Salary settled          |                 |               |             |             | <b>0.60</b>    |               |
| <b>Vulnerability</b>    |                 |               |             |             |                |               |
| Demand work cond.       | 0.14            | <b>0.80</b>   |             |             |                |               |
| Unfair treatment        | 0.11            | <b>0.84</b>   |             |             |                |               |
| Afraid fired            | 0.20            | <b>0.80</b>   |             |             |                |               |
| Treated authoritarian   | 0.11            | <b>0.66</b>   |             | 0.12        |                | 0.13          |
| Easily replaced         | 0.12            | <b>0.77</b>   |             | 0.15        |                |               |
| <b>Rights</b>           |                 |               |             |             |                |               |
| Right parental leave    |                 |               | <b>0.67</b> |             | 0.21           |               |
| Right retirement        |                 |               | <b>0.69</b> |             | 0.16           |               |
| Right unemployment      |                 |               | <b>0.69</b> | 0.11        |                | 0.29          |
| Right severance pay     |                 |               | <b>0.55</b> |             | -0.10          |               |
| Right sickness benefits |                 |               | <b>0.60</b> |             | 0.11           |               |
| <b>Exercise rights</b>  |                 |               |             |             |                |               |

|   |                     |             |      |      |      |       |
|---|---------------------|-------------|------|------|------|-------|
| 1 |                     |             |      |      |      |       |
| 2 |                     |             |      |      |      |       |
| 3 | Take weekend off    | <b>0.65</b> |      |      | 0.10 | 0.14  |
| 4 | Take vacation       | <b>0.70</b> | 0.18 |      |      | -0.13 |
| 5 | Take day off        | <b>0.80</b> | 0.10 | 0.10 |      | -0.13 |
| 6 | Take day off, pers. | <b>0.78</b> | 0.24 |      |      | -0.10 |
| 7 | Sick leave          | <b>0.72</b> | 0.11 |      | 0.12 | 0.15  |
| 8 | Go to doctor        | <b>0.66</b> | 0.11 |      | 0.13 |       |
| 9 |                     |             |      |      |      |       |

Table showing factor loadings >0.1

## DISCUSSION

### Key findings and summary

The scale generally performed well, with a small proportion of missing values across all subscales, usage of all response options and good global reliability. The factor structure established in the Spanish EPRES-2010 (10) was confirmed. The subscales 'vulnerability', 'wages', 'rights' and 'exercise of rights' generally worked well in the Swedish context, with high item-subscale correlations, subscale reliability and factor loadings. However, 'temporariness' did not perform as expected and would need revision. In addition, although 'disempowerment' showed acceptable psychometric properties, the subscale might benefit from additional adaptation.

### 'Temporariness'

As opposed to previous studies, (8-10), temporariness yielded very poor psychometric properties. The items in the subscale did not correlate, there was a negative Cronbach's alpha coefficient and a low factor loading for the item on contract duration. Only minor changes in terms of correlation and Cronbach's alpha was initiated by the removal of informal workers. This subanalysis did, however, split

1  
2  
3 the temporariness dimension in two separate factors, both of which had higher factor  
4  
5 loadings. On the basis of these results, we believe that the temporariness dimension  
6  
7 needs further development and evaluation in a population of both standard and non-  
8  
9 standard employees. Based on the results from the present study, we offer the  
10  
11 following thoughts on this matter:  
12  
13  
14

15  
16 Firstly, it is important to acknowledge the sample selection. As the sample was  
17  
18 restricted to non-standard employees (i.e., permanent, full-time, employees were  
19  
20 excluded), the lower end of the precariousness scale had a smaller proportion than  
21  
22 what would be expected if standard employees with longer duration and tenure  
23  
24 would have been included in the sample. This limitation is likely to have contributed  
25  
26 to the lack of correlation between the items. However, considering that the sample  
27  
28 was intentionally recruited in order to capture a population of precariously employed  
29  
30 individuals, the poor psychometric properties of temporariness also shows that these  
31  
32 items are not necessarily related in a meaningful way when measuring precariousness  
33  
34 among non-standard employees.  
35  
36  
37  
38  
39  
40  
41  
42

43 Secondly, in the current context, the Swedish legislation (the Employment  
44  
45 Protection Act SFS 1982:80) prevents an employer to hire an employee for more than  
46  
47 two years during a five-year period (consecutive or in shorter repeated contracts)  
48  
49 without having to employ (or dismiss) the employee in a permanent contract (51).  
50  
51 Thereby, an employee with an 18-month tenure might be more precarious than an  
52  
53 employee with a 6-month tenure as the latter has longer time left before being  
54  
55 forced in or out. Further, approximately 50% of temporary employees in Sweden has  
56  
57  
58  
59  
60



1  
2  
3 had repeated contracts with the same employer (41), which is an additional reasons  
4  
5 that could contribute to the lack of correlation between tenure and duration of  
6  
7 contract.  
8  
9

10  
11 Thirdly, we found that several participants were employed by the hour or on  
12  
13 demand while still indicating an indefinite contract length. This highlights the  
14  
15 difficulties in assessing temporariness only by contract duration (and tenure).  
16  
17 Temporariness is the dimension most likely to be dependent on context. Given the  
18  
19 proposed mechanism of temporariness leading to ill-health mediated via feelings of  
20  
21 insecurity, temporariness is most relevant in labour markets which do not offer  
22  
23 regulatory protection for certain groups of workers, such as permanent employees in  
24  
25 most European countries, which does not apply to the same extent in the USA (52).  
26  
27  
28  
29  
30  
31

32  
33 However tempting it would be suggest the inclusion of questions regarding  
34  
35 "contract type" in a future development of EPRES, the continuous flexibilization of the  
36  
37 labour market and fast changes in employment practices in combination with  
38  
39 contextual differences, makes it increasingly difficult – at least if international  
40  
41 comparison using similar scales is sought after.  
42  
43  
44  
45

46  
47 From a mechanistic standpoint and with an aspiration to develop a scale which  
48  
49 could be used in international comparison independent of context, we believe that an  
50  
51 item that measures the future employment opportunities with the current employer  
52  
53 as objectively as possible should be developed. EPRES-Se and other translations  
54  
55 could further be adapted, for example by combining the contract duration and  
56  
57 tenure-items with an item assessing the number of repeated contracts with the same  
58  
59  
60

1  
2  
3 employer or an item assessing how often during a specific time interval the  
4  
5 employment contract is up for renewal. Contract duration could also be  
6  
7  
8 complemented or replaced by a question more explicitly assessing the remaining  
9  
10  
11 duration of the contract at the time of answering the survey.  
12  
13  
14  
15

### 16 **'Wages'**

17  
18  
19 The income-item correlated moderately with the other items in the subscale (items  
20  
21 assessing how well the income covers basic needs and unforeseen expenses). Previous  
22  
23 studies report similar findings for this item (8-10). One explanation to these results is  
24  
25 the quantitative nature of the income-item as compared to the other items. Slightly  
26  
27 more than half, 57%, of the participants scored a precariousness level of 3 or 4 on  
28  
29 income, which is not surprising as the sample is constituted by young non-standard  
30  
31 employees. However, only 5% and 25% of the sample scored a precariousness level of  
32  
33 3 or 4 on the other two items respectively. How well one can cover basic needs and  
34  
35 unforeseen expenses could depend on more than income, such as family support.  
36  
37  
38 Approximately 24% of adults aged 20-27 years in Sweden still live at home. In the  
39  
40 majority of municipalities in large city regions, this figure is more than 50% in the  
41  
42 majority of municipalities in large city regions. About half of those living at home pay  
43  
44 nothing in rent (53). As 74% of the sample is between 18-29 years old, it is likely that  
45  
46 at least a part of the participants still live at home and receive help from their family.  
47  
48  
49 Including standard employees in the sample could potentially have increased the item-  
50  
51  
52  
53  
54  
55  
56  
57  
58  
59  
60

1  
2  
3 subscale correlation as we would expect a larger proportion of participants with a high  
4  
5  
6 income.

7  
8         Aside from the income-item, item-subscale correlations for the remaining two  
9  
10 items and subscale reliability were acceptable and only a fraction of the sample did not  
11  
12 provide an answer to the item on income (2.2%). Therefore, as in the other EPRES scales,  
13  
14 we believe the subscale can be used in its current form in future studies.  
15  
16  
17  
18  
19  
20  
21

## 22 **'Disempowerment'**

23  
24 The items in 'disempowerment' had acceptable item-subscale correlations and  
25  
26 reliability. However, some response options ("my working hours/salary was decided  
27  
28 within my working team" and "do not know") were hardly used at all in, indicating that  
29  
30 these options might not be appropriate for the current population in the Swedish  
31  
32 context. Further, the remaining response options were also inadequate from an  
33  
34 adaptational point of view. For example, the working hours/salary being in line with  
35  
36 collective bargaining agreements does not imply that the working hours/salary was not  
37  
38 set by the employer; these options are not mutually exclusive. In a revised EPRES-Se,  
39  
40 the disempowerment-items would benefit from revision and clarification. Combining  
41  
42 response options not mutually exclusive could be considered as one way of improving  
43  
44 the subscale, such as "my working hours are in accordance with Swedish law and the  
45  
46 collective agreement, decided by my employer" and "my working hours are not in  
47  
48 accordance with Swedish law and the collective agreement, decided by my employer".  
49  
50  
51  
52  
53  
54  
55  
56  
57  
58  
59  
60

## **'Rights'**

The new item assessing sickness benefit had an acceptable item-subscale correlation and factor loading, similar to the other item-subscale correlations and factor loadings in the subscale. Further, the subscale reliability was good. Taken together, these results point towards that the new item worked well in the subscale.

## **Strengths and limitations**

This study finds strength in the fact that it is the first study translating and adapting EPRES-2010 to the Swedish context, as well as the first study to assess the psychometric properties of the resulting EPRES-Se. In addition, this work provides context-specific recommendations for future research using EPRES-Se. This study is, however, not without limitations.

The main limitations is the sample. As this study lies within the frame of the PREMIS-project (47), the sample was restricted to employees with a non-standard employment. EPRES, however, is developed to measure precariousness independent of the type of employment (8). By only assessing the psychometric properties of the scale in a population of non-standard employees, the scale properties cannot be directly compared to similar studies as the heterogeneity of the sample is limited. A sample representative of the entire work force would have provided better insights as to how the scale behaves among Swedish employees. A next step which this study has provided strong grounds for.

Finally, the relatively small sample size could influence the reliability of the

1  
2  
3 results, which should be kept in mind when interpreting and generalizing the results.  
4  
5  
6 Further, being a convenience sample limits the generalizability of the results. However,  
7  
8 as the weighted results confirmed the psychometric properties of the scale, we could  
9  
10 expect similar results in a representative sample applying the same sample restrictions.  
11  
12  
13  
14  
15  
16  
17  
18  
19  
20  
21

## 22 **Conclusion**

23  
24 The study found that EPRES-Se worked well in the current context, with high global  
25  
26 reliability, endorsement of all response options (for all items) and few missing values.  
27  
28 The psychometric properties for five out of six subscales were satisfactory, considering  
29  
30 this being the first translation and adaptation. However, one subscale, 'temporariness',  
31  
32 worked poorly and would need revision before implementing the scale in further  
33  
34 research. As employment precariousness is an emergent determinant of health it is  
35  
36 important that PE can be properly measured. The EPRES-Se is an important step in this  
37  
38 direction. We therefore encourage others to continue working with EPRES-Se and to  
39  
40 validate it further in populations of both standard and non-standard employees. Our  
41  
42 hope is for a revised EPRES-Se with satisfactory psychometric properties to be  
43  
44 implemented in research both as an independent tool and included in nation-wide  
45  
46 surveys. In order to enable international comparisons and multinational studies, similar  
47  
48 studies in other European countries are also called for.  
49  
50  
51  
52  
53  
54  
55  
56  
57  
58  
59  
60

## STATEMENTS

**Author contributions:** The study was conceived by Theo Bodin (TB) and Gun Johansson (GJ). All authors, TB, GJ, Johanna Jonsson (JJ), Alejandra Vives (AV), Joan Benach (JB), Katarina Kjellberg (KK) and Jenny Selander (JS), contributed to the design of the study. TB translated and back-translated the EPRES, and AV supported the translation process and examined the back translation. JJ collected the data with support from TB and GJ. JJ and TB conducted the analyses. JJ wrote the draft(s) of the manuscript. All authors reviewed the draft(s) and provided feedback on its content. All authors approved the contents of the final manuscript.

**Acknowledgements:** The authors are grateful to the PREMIS project members and reference group members who provided valuable input during the formative work of the study.

**Author statements:** All of the authors have read and approved of the contents of this manuscript and believes that the manuscript represents honest work. All of the authors have met the ICMJE requirements for authorship. We confirm that the current manuscript has not been published elsewhere and that is it not under consideration by any other journal. The manuscript or any of its content has not been presented at a conference.

1  
2  
3 **Conflict of interest:** The authors declare that there are no conflicts of interest.  
4  
5  
6  
7

8 **Funding:** This work was supported by grant 2015-00933 from The Swedish Research  
9  
10  
11 Council for Health, Working Life and Welfare (FORTE). The funder had no role in study  
12  
13  
14 design, data collection and analysis, decision to publish, or preparation of the  
15  
16  
17 manuscript.  
18  
19  
20  
21

22 **Data sharing:** Deidentified participant data are from the PREMIS study whose  
23  
24 authors may be contacted at [johanna.jonsson@ki.se](mailto:johanna.jonsson@ki.se). Data cannot be made publicly  
25  
26  
27 available for ethical and legal reasons, but could be made available to researchers  
28  
29  
30 who meet the criteria for access to confidential data after approval from the Regional  
31  
32  
33 Ethics Committee of Stockholm.  
34  
35  
36  
37  
38  
39  
40  
41  
42  
43  
44  
45  
46  
47  
48  
49  
50  
51  
52  
53  
54  
55  
56  
57  
58  
59  
60

## REFERENCES

1. CSDH. Closing the gap in a generation: Health equity through action on the social determinants of health. Final Report of the Commission on Social Determinants of Health. Geneva: World Health Organization; 2008.
2. Benach J, Vives A, Amable M, et al. Precarious employment: understanding an emerging social determinant of health. *Annu Rev Public Health* 2014;35(1):229-53.
3. Benach J, Muntaner C, Solar O, et al. Employment, work, and health inequalities: a global perspective. Geneva: WHO; 2007.
4. Benach J, Muntaner C. Precarious employment and health: developing a research agenda. *J Epidemiol Community Health*. 2007;61(4):276-7.
5. Quinlan M, Mayhew C, Bohle P. The global expansion of precarious employment, work disorganization, and consequences for occupational health: placing the debate in a comparative historical context. *Int J Health Serv*. 2001;31(3):507-36.
6. Benach J, Vives A, Tarafa G, et al. What should we know about precarious employment and health in 2025? Framing the agenda for the next decade of research. *Int J Epidemiol*. 2016;45(1):232-8.
7. Howard J. Nonstandard work arrangements and worker health and safety. *Am J Ind Med* 2017;60(1):1-10.
8. Vives A, Amable M, Ferrer M, et al. The Employment Precariousness Scale (EPRES): psychometric properties of a new tool for epidemiological studies among waged and salaried workers. *Occup Environ Med*. 2010;67(8):548-55.
9. Vives-Vergara A, Gonzalez-Lopez F, Solar O, et al. Precarious employment in Chile: psychometric properties of the Chilean version of Employment Precariousness Scale in private sector workers. *Cad Saude Publica*. 2017;33(3):e00156215.
10. Vives A, Gonzalez F, Moncada S, et al. Measuring precarious employment in times of crisis: the revised Employment Precariousness Scale (EPRES) in Spain. *Gac Sanit*. 2015;29(5):379-82.



- 1  
2  
3 11. Vives A, Amable M, Ferrer M, et al. Employment precariousness and poor  
4 mental health: evidence from Spain on a new social determinant of health. *J Environ*  
5  
6  
7  
8  
9  
10 12. Benach J, Julià M, Tarafa G, et al. La precariedad laboral medida de forma  
11 multidimensional: distribución social y asociación con la salud en Cataluña  
12 [Multidimensional measurement of precarious employment: social distribution and its  
13 association with health in Catalonia (Spain)]. *Gac Sanit* 2015;29(5):375-78.  
14  
15  
16  
17 13. Arnold D, Bongiovi JR. Precarious, Informalizing, and Flexible Work:  
18 Transforming Concepts and Understandings. *Am Behav Sci* 2013;57(3):289-308.  
19  
20  
21 14. Broughton A, Green M, Rickard C, et al. Precarious employment in Europe.  
22 Strasbourg: European Parliament; 2016.  
23  
24  
25 15. Muntaner C. Digital Platforms, Gig Economy, Precarious Employment, and the  
26 Invisible Hand of Social Class. *Int J Health Serv* 2018;48(4):597-600.  
27  
28  
29 16. Vosko LF, Zukewich N, Cranford C. Precarious jobs: A new typology of  
30 employment. *Perspect labour income* 2003;15(4).  
31  
32  
33 17. Rodgers G, Rodgers J. Precarious jobs in labour market regulation: the growth  
34 of atypical employment in Western Europe: International Labour Organisation; 1989.  
35  
36  
37 18. Standing G. Global labour flexibility: Seeking distributive justice: Macmillan  
38 London; 1999.  
39  
40  
41 19. Julia M, Vanroelen C, Bosmans K, et al. Precarious Employment and Quality of  
42 Employment in Relation to Health and Well-being in Europe. *Int J Health Serv*  
43 2017;47(3):389-409.  
44  
45  
46  
47 20. Scott-Marshall H, Tompa E. The health consequences of precarious  
48 employment experiences. *Work*. 2011;38(4):369-82.  
49  
50  
51 21. International Labour Organization. From precarious work to decent work:  
52 Outcome document to the workers' symposium on policies and regulations to  
53 combat precarious employment. ILO Geneva; 2012.  
54  
55  
56  
57  
58  
59  
60

- 1  
2  
3 22. Julia M, Vives A, Tarafa G, et al. Changing the way we understand precarious  
4 employment and health: Precarisation affects the entire salaried population. *Safety*  
5 *Science*. 2017;100:66-73.  
6  
7
- 8  
9 23. Lewchuk W. Precarious jobs: Where are they, and how do they affect well-  
10 being? *Econ Labour Relat Rev* 2017;28(3):402-19.  
11  
12
- 13 24. Kretsos L, Livanos I. The extent and determinants of precarious employment in  
14 Europe. *Int J Manpow*. 2016;37(1):25-43.  
15  
16
- 17 25. Van Aerden K, Moors G, Levecque K, et al. Measuring Employment  
18 Arrangements in the European Labour Force: A Typological Approach. *Social*  
19 *Indicators Research*. 2014;116(3):771-91.  
20  
21
- 22 26. Oke A, Braithwaite P, Antai D. Sickness Absence and Precarious Employment: A  
23 Comparative Cross-National Study of Denmark, Finland, Sweden, and Norway.  
24 *International Journal of Occupational and Environmental Medicine*. 2016;7(3):125-47.  
25  
26
- 27 27. Rönnblad T, Grönholm E, Jonsson J, et al. Precarious employment and mental  
28 health: a systematic review and meta-analysis of longitudinal studies. *Scandinavian*  
29 *Journal of Work, Environment & Health*. 2019.  
30  
31
- 32 28. Koranyi I, Jonsson J, Ronnblad T, et al. Precarious employment and  
33 occupational accidents and injuries - a systematic review. *Scand J Work Environ*  
34 *Health*. 2018;44(4):341-50.  
35  
36
- 37 29. Kim TJ, von dem Knesebeck O. Perceived job insecurity, unemployment and  
38 depressive symptoms: a systematic review and meta-analysis of prospective  
39 observational studies. *Int Arch Occup Environ Health*. 2016;89(4):561-73.  
40  
41
- 42 30. Virtanen M, Nyberg ST, Batty GD, et al. Perceived job insecurity as a risk factor  
43 for incident coronary heart disease: systematic review and meta-analysis. *Bmj-British*  
44 *Medical Journal*. 2013;347.  
45  
46
- 47 31. Kivimäki M, Vahtera J, Virtanen M, et al. Temporary Employment and Risk of  
48 Overall and Cause-specific Mortality. *American Journal of Epidemiology*.  
49 2003;158(7):663-68.  
50  
51  
52  
53  
54  
55  
56  
57  
58  
59  
60

- 1  
2  
3 32. De Witte H, Pienaar J, De Cuyper N. Review of 30 years of longitudinal studies  
4 on the association between job insecurity and health and well-being: is there causal  
5 evidence? *Australian Psychologist*. 2016;51(1):18-31.  
6  
7  
8  
9 33. Julia M, Vanroelen C, Bosmans K, et al. Precarious employment and quality of  
10 employment in relation to health and well-being in Europe. *International Journal of*  
11 *Health Services*. 2017;47(3):389-409.  
12  
13  
14  
15 34. Vives A. A multidimensional approach to precarious employment:  
16 measurement, association with poor mental health and prevalence in the Spanish  
17 workforce: Universitat Pompeu Fabra; 2010.  
18  
19  
20  
21 35. Waenerlund AK, Virtanen P, Hammarstrom A. Is temporary employment  
22 related to health status? Analysis of the Northern Swedish Cohort. *Scand J Public*  
23 *Health*. 2011;39(5):533-9.  
24  
25  
26  
27 36. Waenerlund AK, Gustafsson PE, Virtanen P, et al. Is the core-periphery labour  
28 market structure related to perceived health? findings of the Northern Swedish  
29 Cohort. *BMC Public Health*. 2011;11:956.  
30  
31  
32  
33 37. Virtanen P, Janlert U, Hammarström A. Exposure to temporary employment  
34 and job insecurity: a longitudinal study of the health effects. *Occupational and*  
35 *environmental medicine*. 2010;68(8):oem. 2010.054890.  
36  
37  
38  
39 38. Canivet C, Bodin T, Emmelin M, et al. Precarious employment is a risk factor for  
40 poor mental health in young individuals in Sweden: a cohort study with multiple  
41 follow-ups. *BMC Public Health* 2016;16  
42 (1):687.  
43  
44  
45  
46  
47 39. International Labour Organization. Non-standard employment around the  
48 world: Understanding challenges, shaping prospects. Geneva; 2016.  
49  
50  
51 40. Alfonsson J. Nomaderna på den svenska arbetsmarknaden. Det otrygga livets  
52 framväxt och effekter på klasstrukturen [In Swedish]. 2018.  
53  
54  
55 41. Statistics Sweden. Trends for persons in temporary employment [In Swedish].  
56 2015.  
57  
58  
59  
60

- 1  
2  
3 42. Eurofund. Non-standard forms of employment: recent trends and future  
4 prospects 2017b.
- 5  
6  
7 43. The Swedish Labour Policy Council (AER). Olika vägar till jobb [In Swedish].  
8 2018.
- 9  
10  
11 44. Pyoria P, Ojala S. Precarious work and intrinsic job quality: Evidence from  
12 Finland, 1984-2013. *Economic and Labour Relations Review*. 2016;27(3):349-67.
- 13  
14  
15 45. Salganik MJ, Heckathorn DD. Sampling and estimation in hidden populations  
16 using respondent-driven sampling. *Sociol methodol*. 2004;34(1):193-240.
- 17  
18  
19 46. Bengtsson L, Lu X, Nguyen QC, et al. Implementation of web-based  
20 respondent-driven sampling among men who have sex with men in Vietnam. *PLoS*  
21 *One*. 2012;7(11):e49417.
- 22  
23  
24 47. Jonsson J, Stein ML, Johansson G, et al. A performance assessment of web-  
25 based respondent driven sampling among workers with precarious employment in  
26 Sweden. *PLoS One*. 2019;14(1):e0210183.
- 27  
28  
29 48. Volz E, Heckathorn DD. Probability Based Estimation Theory for Respondent  
30 Driven Sampling. *J Off Stat* 2008;24(1):79-97.
- 31  
32  
33 49. Johnston L, Sabin K. Sampling hard -to-reach populations with respondent  
34 driven sampling. *Methodological innovations Online*. 2010;5(2):38-48.
- 35  
36  
37 50. Statistics Sweden. Inkomstrappport 2016 - Hushåll och Individer [In Swedish].  
38 2018.
- 39  
40  
41 51. Lagen (1982:80) om anställningsskydd (SFS 2017:363) [Internet].
- 42  
43  
44 52. OECD. Detailed description of employment protection legislation, 2012-2013.  
45 OECD countries. 2013.
- 46  
47  
48 53. Hyresgästföreningen. Unga vuxnas boende [In Swedish]. 2018.
- 49  
50  
51  
52  
53  
54  
55  
56  
57  
58  
59  
60

## SUPPLEMENTARY MATERIAL

### Supplementary material A. EPRES-Se

#### TEMPORALITET

##### 1. Hur länge gäller ditt nuvarande kontrakt?

Om du har flera arbetsgivare anger du den arbetsgivare du arbetar för flest timmar en genomsnittlig månad.

- Tillsvidare
- 2 år eller mer
- 1 år eller mer
- 6 månader eller mer
- 3 månader eller mer
- 1 månad eller mer
- Kortare än 1 månad
- Har inget kontrakt
- Vet ej

##### 2. Hur länge har du jobbat för samma arbetsgivare/uppdragsgivare?

Om du har flera arbetsgivare anger du den arbetsgivare du arbetar för flest timmar en genomsnittlig månad.

- Mindre än 1 månad
- 1 månad till mindre än 3 månader
- 3 månader till mindre än 6 månader
- 6 månader till mindre än 1 år
- 1 år till mindre än 2 år
- 2 år till mindre än 5 år
- 5 år eller mer

#### LÖN

##### 3. Ungefär hur mycket tjänar du per månad netto (efter skatt)?

Lägg ihop summan för din vita lön efter skatt + svart lön + eventuell dricks, en genomsnittlig månad.

- 3 000 kr eller mindre
- Mellan 3 001 och 6 000 kr
- Mellan 6 001 och 9 000 kr
- Mellan 9 001 och 12 000 kr
- Mellan 12 001 och 15 000 kr
- Mellan 15 001 och 18 000 kr
- Mellan 18 001 och 21 000 kr
- Mellan 21 001 och 24 000 kr
- Mellan 24 001 och 27 000 kr
- Mellan 27 001 och 30 000 kr
- Mer än 30 000 kr
- Inget svar

Hur ofta tillåter din nuvarande lön dig att...

- Alltid
- Ofta
- Ibland
- Sällan
- Aldrig

4. Täcka dina dagliga grundläggande behov?

5. Täcka oförutsedda utgifter av betydelse?

- Ibland
- Sällan
- Aldrig

## MAKTLÖSHET

### 6. Hur bestämdes arbetstiderna för ditt nuvarande arbete?

Välj det alternativ som stämmer bäst in på dig. Om du har flera arbetsgivare anger du den arbetsgivare du arbetar för flest timmar en genomsnittlig månad.

- De följer lag och kollektivavtalet
- De bestämdes av arbetsgivaren
- De var en överenskommelse mellan mig och min chef
- De var en överenskommelse i mitt arbetslag
- Vet ej
- Ej relevant, arbetar uppdragsbaserat

### 7. Hur bestämdes lönen för ditt nuvarande arbete?

Välj det alternativ som stämmer bäst in på dig. Om du har flera arbetsgivare anger du den arbetsgivare du arbetar för flest timmar en genomsnittlig månad.

- Den följer kollektivavtalet
- Den bestämdes av arbetsgivaren
- Den var en överenskommelse mellan mig och min chef
- Den var en överenskommelse i mitt arbetslag
- Vet ej

## SÅRBARHET

### Ange hur ofta hos din arbetsgivare som...

Om du har flera arbetsgivare anger du den arbetsgivare du arbetar för flest timmar en genomsnittlig månad.

Var god besvara alla frågor.

### 8. Du är rädd för att kräva bättre arbetsvillkor

- Alltid
- Ofta

### 9. Du är försvarslös mot orättvis behandling från överordnande

- Ibland
- Sällan

### 10. Du är rädd för att få sparken om du inte gör allt arbetsgivaren ber om

- Aldrig

### 11. Du blir behandlad auktoritärt

### 12. De får dig att känna dig lätt utbytbar

## RÄTTIGHETER

### Har du rätt till något av följande?

Var god besvara alla frågor.

1  
2  
3 **13. Föräldraledighet**

- Ja

- Nej

4  
5 **14. Ålderspension**

- Vet ej

6  
7 **15. A-kassa**

8  
9 **16. Avgångsvederlag vid uppsägning**

10  
11 **17. Sjukersättning/sjukpenning**

## 12 13 14 15 **UTÖVANDE AV RÄTTIGHETER**

16  
17  
18 **Hur ofta i den organisation där du arbetar kan du utöva**  
19 **följande rättigheter?**

20 Om du har flera arbetsgivare anger du den arbetsgivare du  
21 arbetar för flest timmar en genomsnittlig månad.

22  
23 Var god besvara alla frågor.

24  
25  
26 **18. Ta helg/veckovila utan problem**

- Alltid

- Ofta

27  
28 **19. Ta semesterdagar utan problem**

- Ibland

- Sällan

29  
30 **20. Ta en ledig dag av familjescäl utan problem (vård av**  
31 **sjukt barn, vård av sjuk anhörig etc.)**

- Aldrig

32  
33 **21. Ta en ledig dag av personliga skäl utan problem**

34  
35 **22. Sjukskriva dig utan problem**

36  
37 **23. Gå till läkare när du behöver**  
38  
39  
40  
41  
42  
43  
44  
45  
46  
47  
48  
49  
50  
51  
52  
53  
54  
55  
56  
57  
58  
59  
60

## Supplementary material B. English translation of EPRES-Se with coding

### TEMPORARINESS

Coding

|                                                                                                                       |                          |   |
|-----------------------------------------------------------------------------------------------------------------------|--------------------------|---|
| <b>1. How long is your current employment contract valid?</b>                                                         | - Indefinitely           | 0 |
|                                                                                                                       | - 2 years or more        | 1 |
| If you have more than one employer, please indicate the employer you work the most hours for during an average month. | - 1 year or more         | 1 |
|                                                                                                                       | - 6 months or more       | 2 |
|                                                                                                                       | - 3 months or more       | 3 |
|                                                                                                                       | - 1 month or more        | 3 |
|                                                                                                                       | - Less than 1 month      | 3 |
|                                                                                                                       | - Do not have a contract | 4 |
|                                                                                                                       | - Do not know            | 4 |

|                                                                                                                       |                                  |   |
|-----------------------------------------------------------------------------------------------------------------------|----------------------------------|---|
| <b>2. How long have you been working for the same employer?</b>                                                       | - Less than 1 month              | 4 |
|                                                                                                                       | - 1 month to less than 3 months  | 3 |
| If you have more than one employer, please indicate the employer you work the most hours for during an average month. | - 3 months to less than 6 months | 3 |
|                                                                                                                       | - 6 months to less than 1 year   | 2 |
|                                                                                                                       | - 1 year to less than 2 years    | 2 |
|                                                                                                                       | - 2 years to less than 5 years   | 1 |
|                                                                                                                       | - 5 years or more                | 0 |

### WAGES

|                                                                                                                    |                                 |   |
|--------------------------------------------------------------------------------------------------------------------|---------------------------------|---|
| <b>3. Approximately how much do you earn per month after taxes?</b>                                                | - 3000 SEK or less              | 4 |
|                                                                                                                    | - Between 3001 and 6000 SEK     | 4 |
| Add the amount for your salary after tax deductions + salary for illicit work + any tips, during an average month. | - Between 6001 and 9000 SEK     | 3 |
|                                                                                                                    | - Between 9001 and 12 000 SEK   | 3 |
|                                                                                                                    | - Between 12 001 and 15 000 SEK | 2 |
|                                                                                                                    | - Between 15 001 and 18 000 SEK | 2 |
|                                                                                                                    | - Between 18 001 and 21 000 SEK | 1 |
|                                                                                                                    | - Between 21 001 and 24 000 SEK | 1 |
|                                                                                                                    | - Between 24 001 and 27 000 SEK | 0 |
|                                                                                                                    | - Between 27 001 and 30 000 SEK | 0 |
|                                                                                                                    | - More than 30 000 SEK          | 0 |
|                                                                                                                    | - No answer                     | - |

|                                                           |             |   |
|-----------------------------------------------------------|-------------|---|
| <b>How often does your current salary allow you to...</b> | - Always    | 0 |
|                                                           | - Often     | 1 |
| <b>4. Cover you daily basic needs?</b>                    | - Sometimes | 2 |
| <b>5. Cover unforeseen expenses of significance?</b>      | - Rarely    | 3 |
|                                                           | - Never     | 4 |



## DISEMPOWERMENT

### 6. How were your working hours settled for your current job?

Indicate the alternative that fits you best. If you have more than one employer, please indicate the employer you work the most hours for during an average month.

- My working hours are in accordance with Swedish law and the collective agreement 0
- My employer decided my working hours 3
- My working hours are the result of an agreement between me and my manager 2
- My working hours are the result of an agreement within my work team 1
- Do not know 4
- Not applicable. I work project-based 2

### 7. How was the salary settled for your current job?

Indicate the alternative that fits you best. If you have more than one employer, please indicate the employer you work the most hours for during an average month.

- My salary is accordance with the collective agreement 0
- My salary was set by my employer 3
- My salary is the result of an agreement between me and my manager 2
- My salary is the result of an agreement in my work team 1
- Do not know 4

## VULNERABILITY

### Indicate how often, at your employer...

If you have more than one employer, please indicate the employer you work the most hours for during an average month.

Please indicate an answer to all of the questions.

### 8. You feel afraid to demand better working conditions

- Always 4
- Often 3
- Sometimes 2

### 9. You are defenceless towards unfair treatment by your superiors

- Rarely 1
- Never 0

### 10. You feel afraid of being fired if you do not comply with everything your employer asks of you

### 11. You are treated in an authoritarian manner

1  
2  
3 **12. You are made to feel easily replaceable**  
4  
5

6 **RIGHTS**  
7

8  
9 **Do you have the right to any of the following?**

10 Please indicate an answer to all of the questions.  
11

|    |                                                      |               |   |
|----|------------------------------------------------------|---------------|---|
| 12 |                                                      |               |   |
| 13 | <b>13. Parental leave</b>                            | - Yes         | 0 |
| 14 |                                                      | - No          | 1 |
| 15 | <b>14. Retirement due to old age</b>                 | - Do not know | 2 |
| 16 |                                                      |               |   |
| 17 | <b>15. Unemployment insurance fund (A-kassa)</b>     |               |   |
| 18 |                                                      |               |   |
| 19 | <b>16. Severance pay in the event of termination</b> |               |   |
| 20 |                                                      |               |   |
| 21 | <b>17. Sickness benefit</b>                          |               |   |
| 22 |                                                      |               |   |
| 23 |                                                      |               |   |

24 **EXERCISE OF RIGHTS**  
25

26  
27  
28 **How often, in the organisation where you work, are**  
29 **you able to exercise the following rights?**

30 If you have more than one employer, please indicate the  
31 employer you work the most hours for during an average  
32 month.  
33

34 Please indicate an answer to all of the questions.  
35

|    |                                                               |             |   |
|----|---------------------------------------------------------------|-------------|---|
| 36 | <b>18. Take the weekend off/ weekly rest without</b>          | - Always    | 0 |
| 37 | <b>problem</b>                                                | - Often     | 1 |
| 38 | <b>19. Take vacation days without problem</b>                 | - Sometimes | 2 |
| 39 |                                                               | - Rarely    | 3 |
| 40 | <b>20. Take a day off for family reasons without</b>          | - Never     | 4 |
| 41 | <b>problem (care of a sick child, care of a sick relative</b> |             |   |
| 42 | <b>etc.)</b>                                                  |             |   |
| 43 |                                                               |             |   |
| 44 | <b>21. Take a day off for personal reasons without</b>        |             |   |
| 45 | <b>problem</b>                                                |             |   |
| 46 |                                                               |             |   |
| 47 | <b>22. Go on sick leave without problem</b>                   |             |   |
| 48 |                                                               |             |   |
| 49 | <b>23. Go to the doctor when needed</b>                       |             |   |
| 50 |                                                               |             |   |
| 51 |                                                               |             |   |

## Supplementary material C. Comparison of subscale means for recoding of participants with an indefinite contract and on demand/by the hour employment

### Crosstabulation of type of employment and contractual length

Table showing crosstabulation of type of employment and contractual length (EPRES-Se item 1)

| Contractual length       | Type of employment   |                                |                                                | Total      |
|--------------------------|----------------------|--------------------------------|------------------------------------------------|------------|
|                          | Temporary employment | Employed on demand/by the hour | Self-employed (involuntary), intern, part-time |            |
| Indefinitely             | 16 <sup>a</sup>      | 139 <sup>b</sup>               | 20 <sup>a</sup>                                | 175        |
| 2 years or more          | 3                    | 3                              | 1                                              | 7          |
| 1 year or more           | 9                    | 7                              | 1                                              | 17         |
| 6 months or more         | 34                   | 32                             | 9                                              | 75         |
| 3 months or more         | 24                   | 19                             | 6                                              | 49         |
| 1 month or more          | 16                   | 6                              | 2                                              | 24         |
| Less than 1 month        | 11                   | 5                              | 0                                              | 16         |
| I do not have a contract | 2                    | 21                             | 12                                             | 35         |
| Do not know              | 6                    | 11                             | 0                                              | 17         |
| <b>Total</b>             | <b>121</b>           | <b>243</b>                     | <b>51</b>                                      | <b>415</b> |

<sup>a</sup> Used in comparison 2

<sup>b</sup> Used in comparison 1

## 1. Comparison of subscale means for employees with an indefinite contractual length and on demand/by the hour employment

Table showing subscale averages for employees with an indefinite contractual length and an on demand/by the hour employment

| Subscale           | N   | Minimum | Maximum | Mean | Std. Deviation |
|--------------------|-----|---------|---------|------|----------------|
| Wages              | 135 | 0.00    | 3.67    | 1.76 | 0.72           |
| Disempowerment     | 139 | 0.00    | 4.00    | 2.21 | 0.97           |
| Vulnerability      | 137 | 0.00    | 4.00    | 1.35 | 0.94           |
| Rights             | 136 | 0.00    | 4.00    | 2.35 | 1.06           |
| Exercise of rights | 136 | 0.00    | 3.50    | 1.74 | 0.71           |
| Valid N            | 134 |         |         |      |                |

Table showing least sum of squares-differences between subscale averages for employees with an on demand/by the hour employment, comparing employees with an indefinite contractual length vs. employees with any other contractual length

| EPRES-Se item 1. How long is your current employment valid? |       |       |       |       |       |              |             |              |
|-------------------------------------------------------------|-------|-------|-------|-------|-------|--------------|-------------|--------------|
| Subscale                                                    | 2 y   | 1y    | 6m    | 3m    | 1m    | <1m          | No contract | I don't know |
| Wages                                                       | 0.014 | 0.652 | 0.320 | 0,100 | 0.348 | 0.096        | 0.142       | 0.025        |
| Disempowerment                                              | 0.379 | 0.284 | 0.072 | 0.367 | 0.295 | 0.212        | 0.165       | 0.151        |
| Vulnerability                                               | 1.216 | 0.092 | 0.320 | 0,004 | 0.518 | 0.251        | 0.461       | 0.658        |
| Rights                                                      | 2.086 | 0.467 | 0.053 | 0,659 | 0.180 | 0.113        | 0.123       | 0.338        |
| Exercise of rights                                          | 0.185 | 0.764 | 0.135 | 0,191 | 0.315 | 0.040        | 0.046       | 0.558        |
| Sum                                                         | 3.880 | 2.258 | 0.899 | 1.320 | 1.657 | <b>0.713</b> | 0.936       | 1.731        |

## 2. Comparison of subscale means for employees with an indefinite contractual length and any other type of employment (excluding on demand/by the hour)

Table showing subscale averages for employees with an indefinite contract length and any other type of employment

| Subscale           | N  | Minimum | Maximum | Mean  | Std. Deviation |
|--------------------|----|---------|---------|-------|----------------|
| Wages              | 35 | 0.33    | 4.00    | 1.819 | 0.919          |
| Disempowerment     | 36 | 0.00    | 4.00    | 2.167 | 1.095          |
| Vulnerability      | 36 | 0.00    | 4.00    | 1.167 | 0.966          |
| Rights             | 36 | 0.00    | 4.00    | 2.356 | 1.182          |
| Exercise of rights | 36 | 0.00    | 4.00    | 1.690 | 0.876          |
| Valid N            | 35 |         |         |       |                |

Table showing least sum of squares-differences between subscale averages for employees with any other employment (excluding on demand/by the hour employees), comparing employees with an indefinite contractual length vs. employees with any other contractual length

| EPRES-Se item 1. How long is your current employment valid? |       |       |       |       |       |       |             |              |
|-------------------------------------------------------------|-------|-------|-------|-------|-------|-------|-------------|--------------|
| Subscale                                                    | 2 y   | 1y    | 6m    | 3m    | 1m    | <1m   | No contract | I don't know |
| Wages                                                       | 1.402 | 0.486 | 0.510 | 0.624 | 0.504 | 0.819 | 0.264       | 0.459        |
| Disempowerment                                              | 0.541 | 0.216 | 0.190 | 0.083 | 0.083 | 0.121 | 0.190       | 0.000        |
| Vulnerability                                               | 0.533 | 0.233 | 0.517 | 0.667 | 0.500 | 0.258 | 0.276       | 0.633        |
| Rights                                                      | 1.456 | 0.836 | 0.132 | 0.276 | 0.378 | 0.792 | 0.298       | 0.422        |
| Exercise of rights                                          | 0.357 | 0.957 | 0.252 | 0.179 | 0.227 | 0.311 | 0.404       | 0.032        |
| Sum                                                         | 4.289 | 2.727 | 1.601 | 1.828 | 1.692 | 2.301 | 1.433       | 1.547        |

**Supplementary material D. Weighted results, table 1-4****Table 1. Weighted demographic characteristics of the study population (percentages), N=415**

|                   |                                  | %   |
|-------------------|----------------------------------|-----|
| <b>Age</b>        | 18-24                            | 34% |
|                   | 25-29                            | 43% |
|                   | 30-64                            | 23% |
| <b>Sex</b>        | Male                             | 50% |
|                   | Female                           | 50% |
| <b>Employment</b> | Temporary employment             | 21% |
|                   | Employed on demand/by the hour   | 64% |
|                   | Self-employed (involuntary)      | 3%  |
|                   | Intern                           | 1%  |
|                   | Part-time employed (involuntary) | 10% |

**Table 2. Weighted item descriptive statistics and Pearson item-subscale correlations of EPRES-Se**

| Item                              | Missing % <sup>1</sup> | Mean | SD <sup>2</sup> | Response frequency <sup>3</sup> |      |      |      |      | Pearson item subscale correlations <sup>4</sup> |             |             |             |             |             |
|-----------------------------------|------------------------|------|-----------------|---------------------------------|------|------|------|------|-------------------------------------------------|-------------|-------------|-------------|-------------|-------------|
|                                   |                        |      |                 | 0                               | 1    | 2    | 3    | 4    | T                                               | W           | D           | V           | R           | ER          |
| <b>Temporariness</b>              |                        |      |                 |                                 |      |      |      |      |                                                 |             |             |             |             |             |
| Length of contract <sup>5</sup>   | 0.0                    | 2.5  | 1.1             | 9.5                             | 5.8  | 17.9 | 56.0 | 10.9 | <b>-0.05</b>                                    | 0.02        | -0.03       | 0.06        | 0.06        | 0.05        |
| Time working empl. <sup>5</sup>   | 0.0                    | 2.1  | 0.9             | 2.8                             | 22.1 | 43.8 | 27.8 | 3.5  | <b>-0.05</b>                                    | 0.15        | 0.17        | 0.05        | 0.36        | 0.21        |
| <b>Wages</b>                      |                        |      |                 |                                 |      |      |      |      |                                                 |             |             |             |             |             |
| Income monthly                    | 3.5                    | 2.6  | 1.0             | 6.9                             | 6.6  | 23.3 | 47.0 | 16.1 | 0.13                                            | <b>0.40</b> | 0.04        | 0.01        | 0.27        | 0.23        |
| Cover basic need                  | 1.2                    | 0.8  | 0.9             | 40.2                            | 44.2 | 11.4 | 2.5  | 1.7  | 0.01                                            | <b>0.61</b> | 0.03        | 0.27        | 0.13        | 0.28        |
| Cover unforeseen expen.           | 1.2                    | 1.8  | 1.1             | 13.3                            | 28.7 | 34.3 | 15.6 | 8.1  | 0.13                                            | <b>0.57</b> | 0.08        | 0.42        | 0.17        | 0.22        |
| <b>Disempowerment</b>             |                        |      |                 |                                 |      |      |      |      |                                                 |             |             |             |             |             |
| Working hour settled <sup>5</sup> | 0.0                    | 2.2  | 1.2             | 18.7                            | 0.7  | 31.3 | 42.7 | 6.5  | 0.06                                            | 0.13        | <b>0.33</b> | 0.08        | 0.20        | 0.16        |
| Salary settled <sup>5</sup>       | 0.0                    | 2.2  | 1.2             | 19.3                            | 2.1  | 19.3 | 54.1 | 5.2  | 0.07                                            | -0.03       | <b>0.33</b> | 0.00        | 0.10        | 0.11        |
| <b>Vulnerability</b>              |                        |      |                 |                                 |      |      |      |      |                                                 |             |             |             |             |             |
| Demand work cond.                 | 1.2                    | 1.4  | 1.1             | 21.8                            | 33.0 | 28.4 | 11.4 | 5.4  | 0.04                                            | 0.20        | 0.09        | <b>0.76</b> | 0.09        | 0.25        |
| Unfair treatment                  | 1.2                    | 1.2  | 1.1             | 28.5                            | 39.2 | 18.4 | 9.9  | 4.0  | 0.04                                            | 0.20        | 0.08        | <b>0.80</b> | 0.10        | 0.26        |
| Afraid fired                      | 1.2                    | 1.4  | 1.2             | 28.4                            | 30.9 | 21.4 | 13.3 | 6.0  | 0.09                                            | 0.31        | 0.10        | <b>0.79</b> | 0.17        | 0.38        |
| Treated authoritarian             | 1.2                    | 1.2  | 1.1             | 28.4                            | 38.1 | 19.1 | 9.9  | 4.5  | 0.03                                            | 0.21        | -0.04       | <b>0.64</b> | 0.12        | 0.23        |
| Easily replaced                   | 1.2                    | 1.6  | 1.2             | 21.6                            | 33.2 | 22.7 | 11.5 | 11.1 | 0.13                                            | 0.30        | -0.02       | <b>0.74</b> | 0.15        | 0.24        |
| <b>Rights</b>                     |                        |      |                 |                                 |      |      |      |      |                                                 |             |             |             |             |             |
| Right parental leave              | 1.2                    | 1.2  | 0.8             | 23.0                            | 33.7 | 43.3 |      |      | 0.19                                            | 0.20        | 0.22        | 0.12        | <b>0.59</b> | 0.22        |
| Right retirement                  | 1.2                    | 1.2  | 0.8             | 24.4                            | 29.8 | 45.8 |      |      | 0.29                                            | 0.20        | 0.23        | 0.17        | <b>0.59</b> | 0.28        |
| Right unemployment                | 1.2                    | 1.0  | 0.9             | 36.7                            | 24.7 | 38.6 |      |      | 0.13                                            | 0.17        | 0.05        | 0.07        | <b>0.60</b> | 0.12        |
| Right severance pay               | 1.2                    | 1.3  | 0.6             | 6.0                             | 53.2 | 40.8 |      |      | 0.14                                            | <b>0.11</b> | 0.04        | 0.05        | <b>0.50</b> | 0.05        |
| Right sickness benefits           | 1.2                    | 1.0  | 0.9             | 38.7                            | 26.8 | 34.5 |      |      | 0.28                                            | 0.15        | 0.10        | 0.13        | <b>0.53</b> | 0.15        |
| <b>Exercise of rights</b>         |                        |      |                 |                                 |      |      |      |      |                                                 |             |             |             |             |             |
| Take weekend off                  | 1.2                    | 1.7  | 1.1             | 19.9                            | 17.4 | 44.6 | 11.5 | 6.5  | 0.07                                            | 0.23        | 0.14        | 0.21        | 0.13        | <b>0.67</b> |
| Take vacation                     | 1.2                    | 1.9  | 1.0             | 12.3                            | 20.1 | 43.4 | 18.3 | 6.0  | 0.15                                            | 0.25        | 0.18        | 0.27        | 0.19        | <b>0.71</b> |
| Take day off                      | 1.2                    | 1.7  | 1.1             | 21.4                            | 17.8 | 41.4 | 13.6 | 5.8  | 0.18                                            | 0.22        | 0.19        | 0.25        | 0.20        | <b>0.77</b> |
| Take day off, pers.               | 1.2                    | 1.9  | 1.1             | 13.7                            | 19.1 | 41.8 | 16.4 | 9.0  | 0.12                                            | 0.23        | 0.05        | 0.37        | 0.19        | <b>0.71</b> |
| Sick leave                        | 1.2                    | 1.6  | 1.1             | 21.7                            | 19.1 | 42.9 | 12.1 | 4.1  | 0.11                                            | 0.22        | 0.15        | 0.23        | 0.19        | <b>0.70</b> |
| Go to doctor                      | 1.2                    | 1.2  | 1.1             | 34.3                            | 27.1 | 28.2 | 7.2  | 3.2  | 0.19                                            | 0.28        | 0.07        | 0.24        | 0.19        | <b>0.67</b> |

<sup>1</sup> Proportion of participants with any missing item; <sup>2</sup> SD=Standard Deviation; <sup>3</sup> Frequency (%) of participants indicating the specific response. 0 indicates the lowest precariousness score, 4 indicating the highest precariousness score. <sup>4</sup> Corrected for overlap, i.e., item is removed from the corresponding subscale. T=Temporariness; W=Wages; D=Disempowerment; V=Vulnerability; R=Rights; ER=Exercise rights. <sup>5</sup> Inter-item correlations

**Table 3. Weighted scale descriptive statistics: range, mean, standard deviation (SD), floor and ceiling effects and Cronbach's alpha coefficient**

| Subscale           | Items | Mean | SD  | Missing (%) <sup>1</sup> | Obs. range | Floor % <sup>2</sup> | Ceiling % <sup>2</sup> | Cronbach's alpha |
|--------------------|-------|------|-----|--------------------------|------------|----------------------|------------------------|------------------|
| Temporariness      | 2     | 2.3  | 0.7 | 0.0                      | 0-4        | 0.3                  | 1.3                    | -0.10            |
| Wages              | 3     | 1.7  | 0.8 | 4.7                      | 0-4        | 3.0                  | 1.0                    | 0.70             |
| Disempowerment     | 2     | 2.2  | 1.0 | 0.0                      | 0-4        | 8.7                  | 2.4                    | 0.50             |
| Vulnerability      | 5     | 1.4  | 1.0 | 1.2                      | 0-4        | 14.3                 | 2.0                    | 0.90             |
| Rights             | 5     | 2.3  | 1.1 | 1.3                      | 0-4        | 3.8                  | 17.9                   | 0.78             |
| Exercise of rights | 6     | 1.6  | 0.9 | 1.3                      | 0-4        | 7.3                  | 1.0                    | 0.89             |
| EPRES-se           | 23    | 1.9  | 0.5 | 4.8                      | 0.09-3.07  | 0.2                  | 0.7                    | 0.84             |

<sup>1</sup> Proportion of participants with any missing item

<sup>2</sup> Proportion of participants with lowest (floor) and highest (ceiling) EPRES-Se scores



**Table 4. Weighted factor loadings from exploratory factor analysis of the EPRES-Se**

|                         | Factor          |               |             |             |                |               |
|-------------------------|-----------------|---------------|-------------|-------------|----------------|---------------|
|                         | Exercise rights | Vulnerability | Rights      | Wages       | Disempowerment | Temporariness |
| <b>Temporariness</b>    |                 |               |             |             |                |               |
| Length of contract      |                 |               |             |             |                | <b>-0.21</b>  |
| Time working empl.      | 0.17            |               | 0.37        |             | 0.14           | <b>-0.36</b>  |
| <b>Wages</b>            |                 |               |             |             |                |               |
| Income monthly          | 0.20            | -0.11         | 0.24        | <b>0.49</b> |                | -0.25         |
| Cover basic need        | 0.20            | 0.19          |             | <b>0.66</b> |                |               |
| Cover unforeseen expen. |                 | 0.35          |             | <b>0.84</b> |                | 0.19          |
| <b>Disempowerment</b>   |                 |               |             |             |                |               |
| Working hour settled    |                 |               | 0.14        |             | <b>0.43</b>    |               |
| Salary settled          |                 |               |             |             | <b>0.69</b>    | 0.15          |
| <b>Vulnerability</b>    |                 |               |             |             |                |               |
| Demand work cond.       | 0.11            | <b>0.81</b>   |             |             |                |               |
| Unfair treatment        |                 | <b>0.86</b>   |             |             |                |               |
| Afraid fired            | 0.24            | <b>0.80</b>   |             | 0.12        | 0.13           | -0.12         |
| Treated authoritarian   | 0.11            | <b>0.67</b>   |             |             | -0.14          |               |
| Easily replaced         |                 | <b>0.76</b>   |             | 0.17        |                |               |
| <b>Rights</b>           |                 |               |             |             |                |               |
| Right parental leave    | 0.15            |               | <b>0.69</b> |             | 0.19           |               |
| Right retirement        | 0.17            |               | <b>0.68</b> |             | 0.24           | -0.13         |
| Right unemployment      |                 |               | <b>0.70</b> |             |                | -0.17         |
| Right severance pay     |                 |               | <b>0.56</b> |             |                |               |
| Right sickness benefits |                 |               | <b>0.60</b> |             |                | 0.14          |
| <b>Exercise rights</b>  |                 |               |             |             |                |               |
| Take weekend off        | <b>0.69</b>     |               |             | 0.11        |                | -0.11         |
| Take vacation           | <b>0.74</b>     | 0.12          |             |             | 0.10           |               |
| Take day off            | <b>0.82</b>     | 0.10          |             |             |                | 0.14          |
| Take day off, pers.     | <b>0.73</b>     | 0.25          |             |             | -0.10          | 0.10          |
| Sick leave              | <b>0.74</b>     |               |             |             | 0.15           | -0.16         |
| Go to doctor            | <b>0.69</b>     |               | 0.11        | 0.15        |                |               |

Table showing factor loadings >0.1

The weighted exploratory factor analysis extracted six factor with eigenvalues >1 (eigenvalues: 5.6; 3.0; 2.5; 1.5; 1.4; 1.1). These factors were the same as in EPRES-2010, thereby confirming the EPRES-2010 scale structure. Together, the six factor explained 65.4% of the variance.

1  
2  
3  
4  
5  
6  
7  
8  
9  
10  
11  
12  
13  
14  
15  
16  
17  
18  
19  
20  
21  
22  
23  
24  
25  
26  
27  
28  
29  
30  
31  
32  
33  
34  
35  
36  
37  
38  
39  
40  
41  
42  
43  
44  
45  
46  
47  
48  
49  
50  
51  
52  
53  
54  
55  
56  
57  
58  
59  
60

For peer review only

STROBE Statement—Checklist of items that should be included in reports of *cross-sectional studies*

|                              | Item No | Recommendation                                                                                                                                                                                                                                                                                                                                                                                                |
|------------------------------|---------|---------------------------------------------------------------------------------------------------------------------------------------------------------------------------------------------------------------------------------------------------------------------------------------------------------------------------------------------------------------------------------------------------------------|
| <b>Title and abstract</b>    | 1       | (a) Indicate the study's design with a commonly used term in the title or the abstract<br>(b) Provide in the abstract an informative and balanced summary of what was done and what was found                                                                                                                                                                                                                 |
| <b>Introduction</b>          |         |                                                                                                                                                                                                                                                                                                                                                                                                               |
| Background/rationale         | 2       | Explain the scientific background and rationale for the investigation being reported                                                                                                                                                                                                                                                                                                                          |
| Objectives                   | 3       | State specific objectives, including any prespecified hypotheses                                                                                                                                                                                                                                                                                                                                              |
| <b>Methods</b>               |         |                                                                                                                                                                                                                                                                                                                                                                                                               |
| Study design                 | 4       | Present key elements of study design early in the paper                                                                                                                                                                                                                                                                                                                                                       |
| Setting                      | 5       | Describe the setting, locations, and relevant dates, including periods of recruitment, exposure, follow-up, and data collection                                                                                                                                                                                                                                                                               |
| Participants                 | 6       | (a) Give the eligibility criteria, and the sources and methods of selection of participants                                                                                                                                                                                                                                                                                                                   |
| Variables                    | 7       | Clearly define all outcomes, exposures, predictors, potential confounders, and effect modifiers. Give diagnostic criteria, if applicable                                                                                                                                                                                                                                                                      |
| Data sources/<br>measurement | 8*      | For each variable of interest, give sources of data and details of methods of assessment (measurement). Describe comparability of assessment methods if there is more than one group                                                                                                                                                                                                                          |
| Bias                         | 9       | Describe any efforts to address potential sources of bias                                                                                                                                                                                                                                                                                                                                                     |
| Study size                   | 10      | Explain how the study size was arrived at                                                                                                                                                                                                                                                                                                                                                                     |
| Quantitative variables       | 11      | Explain how quantitative variables were handled in the analyses. If applicable, describe which groupings were chosen and why                                                                                                                                                                                                                                                                                  |
| Statistical methods          | 12      | (a) Describe all statistical methods, including those used to control for confounding<br>(b) Describe any methods used to examine subgroups and interactions<br>(c) Explain how missing data were addressed<br>(d) If applicable, describe analytical methods taking account of sampling strategy<br>(e) Describe any sensitivity analyses                                                                    |
| <b>Results</b>               |         |                                                                                                                                                                                                                                                                                                                                                                                                               |
| Participants                 | 13*     | (a) Report numbers of individuals at each stage of study—eg numbers potentially eligible, examined for eligibility, confirmed eligible, included in the study, completing follow-up, and analysed<br>(b) Give reasons for non-participation at each stage<br>(c) Consider use of a flow diagram                                                                                                               |
| Descriptive data             | 14*     | (a) Give characteristics of study participants (eg demographic, clinical, social) and information on exposures and potential confounders<br>(b) Indicate number of participants with missing data for each variable of interest                                                                                                                                                                               |
| Outcome data                 | 15*     | Report numbers of outcome events or summary measures                                                                                                                                                                                                                                                                                                                                                          |
| Main results                 | 16      | (a) Give unadjusted estimates and, if applicable, confounder-adjusted estimates and their precision (eg, 95% confidence interval). Make clear which confounders were adjusted for and why they were included<br>(b) Report category boundaries when continuous variables were categorized<br>(c) If relevant, consider translating estimates of relative risk into absolute risk for a meaningful time period |
| Other analyses               | 17      | Report other analyses done—eg analyses of subgroups and interactions, and sensitivity analyses                                                                                                                                                                                                                                                                                                                |

1  
2  
3  
4  
5  
6  
7  
8  
9  
10  
11  
12  
13  
14  
15  
16  
17  
18  
19  
20  
21  
22  
23  
24  
25  
26  
27  
28  
29  
30  
31  
32  
33  
34  
35  
36  
37  
38  
39  
40  
41  
42  
43  
44  
45  
46  
47  
48  
49  
50  
51  
52  
53  
54  
55  
56  
57  
58  
59  
60

| <b>Discussion</b>        |    |                                                                                                                                                                            |
|--------------------------|----|----------------------------------------------------------------------------------------------------------------------------------------------------------------------------|
| Key results              | 18 | Summarise key results with reference to study objectives                                                                                                                   |
| Limitations              | 19 | Discuss limitations of the study, taking into account sources of potential bias or imprecision. Discuss both direction and magnitude of any potential bias                 |
| Interpretation           | 20 | Give a cautious overall interpretation of results considering objectives, limitations, multiplicity of analyses, results from similar studies, and other relevant evidence |
| Generalisability         | 21 | Discuss the generalisability (external validity) of the study results                                                                                                      |
| <b>Other information</b> |    |                                                                                                                                                                            |
| Funding                  | 22 | Give the source of funding and the role of the funders for the present study and, if applicable, for the original study on which the present article is based              |

\*Give information separately for exposed and unexposed groups.

**Note:** An Explanation and Elaboration article discusses each checklist item and gives methodological background and published examples of transparent reporting. The STROBE checklist is best used in conjunction with this article (freely available on the Web sites of PLoS Medicine at <http://www.plosmedicine.org/>, Annals of Internal Medicine at <http://www.annals.org/>, and Epidemiology at <http://www.epidem.com/>). Information on the STROBE Initiative is available at [www.strobe-statement.org](http://www.strobe-statement.org).
